# Supplementary material for: Diastereoselective bicyclization of enynols via gold catalysis
Source: Royal Society of Chemistry journal article supplement (doi:10.1039/c9qo00963a), 2019-01-01
Supplement: c9qo00963a1.pdf [file c9qo00963a1.pdf]

# Electronic Supporting Information for

## Diastereoselective Bicyclization of Enynols *via* Gold Catalysis

Chiara Cecchini,<sup>a</sup> Gianpiero Cera,<sup>a</sup> Matteo Lanzi,<sup>a</sup> Luciano Marchiò,<sup>a</sup> Max Malacria<sup>b</sup>  
and Giovanni Maestri<sup>a</sup>

<sup>a</sup> Università di Parma, Dipartimento di Scienze Chimiche, della Vita e della Sostenibilità  
Ambientale, Parco Area delle Scienze 17/A, 43124 Parma, Italy;

<sup>b</sup> Sorbonne Université, Institut Parisien de Chimie Moléculaire, UMR 8232, Place Jussieu 4, 75252  
Paris, France.

;

## **Table of contents**

|                                      |    |
|--------------------------------------|----|
| <b>General remarks and materials</b> | 3  |
| <b>Synthesis of reagents</b>         | 4  |
| <b>Synthesis of products</b>         | 16 |
| <b>Scope limitations</b>             | 26 |
| <b>Copies of NMR spectra</b>         | 27 |
| <b>Crystallographic data</b>         | 66 |
| <b>References</b>                    | 69 |

## General Remarks and Materials

All chemicals those syntheses are not reported hereafter were purchased from commercial sources and used as received.  $^1\text{H}$ ,  $^{13}\text{C}$ ,  $^{31}\text{P}$  NMR spectra were recorded at 300 K on a Bruker 400 MHz or Bruker 300 MHz spectrometers using solvents as internal standards (7.26 ppm for  $^1\text{H}$  NMR and 77.00 ppm for  $^{13}\text{C}$  NMR for  $\text{CDCl}_3$ )  $^{19}\text{F}$ -NMR spectra were recorded in  $\text{CDCl}_3$  at 298 K on a JEOL 600 spectrometer. The terms m, s, d, t, q and quint represent multiplet, singlet, doublet, triplet, quadruplet and quintuplet respectively, and the term brs means a broad signal. LC-MS were recorded on an Agilent LQ Mass Spectrometer (ESI source). Chromatographic purifications were performed under gradient using a Combiflash® system and prepacked disposable silica cartridges. The synthesis of enynes **A** (see **GP-1**) and substituted acetates **B** (see **GP-2**) was carried out following known procedures.<sup>[1,2]</sup> Substituted *N*-cinnamyl-4-methylbenzenesulfonamides **C** (see **GP-3**) were prepared according to a previously employed protocol.<sup>[3]</sup> Gold complexes **B**, **C** and **E** were obtained following published procedures.<sup>[4,5,6]</sup> CCDC 1941564-1941565 contain the crystallographic data for products **4a** and **2g**, respectively.

## Synthesis of reagents

### General Procedure for synthesis of enynols (GP-1)

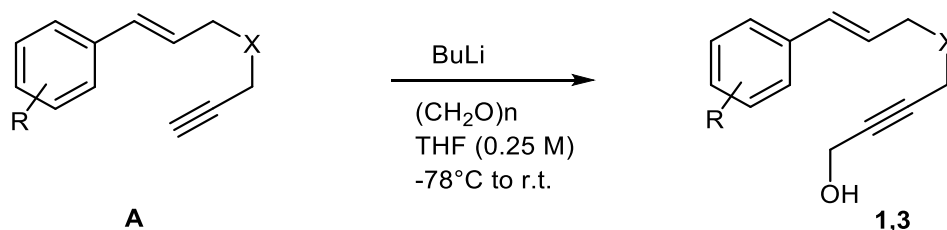

A solution of the desired enyne **A** (1 equiv.) in THF (0.25 M) was cooled to -78°C and then BuLi (1.6 M in hexane, 1.3 equiv.) was added dropwise under a N<sub>2</sub> atmosphere. After 1 hour, paraformaldehyde (3 equiv.) was added and the mixture was stirred overnight at room temperature. Upon complete conversion, a saturated solution of NH<sub>4</sub>Cl (30 mL) was added and the resulting mixture was extracted with EtOAc (3 x 20 mL). The combined organic phases were dried over anhydrous Na<sub>2</sub>SO<sub>4</sub>, concentrated under reduced pressure and purified by column chromatography (eluent: gradient hexane/ethyl acetate).

### General Procedure for synthesis of enynols (GP-2)

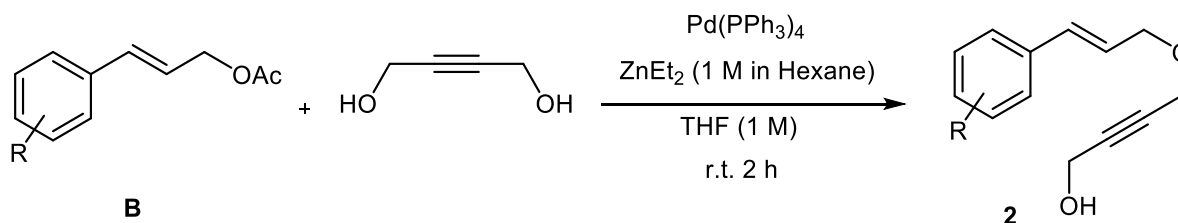

To a solution of but-2-yne-1,4-diol (5 equiv.) in THF, Et<sub>2</sub>Zn (0.9 M in hexane, 0.5 equiv.) was added dropwise. The resulting mixture was stirred until it turned cloudily white (30 min). At this point the desired acetate **B** (1 equiv.) and Pd(PPh<sub>3</sub>)<sub>4</sub> (5 mol%) were then added and the reaction was stirred overnight at room temperature. Upon complete conversion, the mixture was concentrated and carefully purified by column chromatography (eluent: gradient hexane/ethyl acetate).

### General Procedure for synthesis of enynols (GP-3)

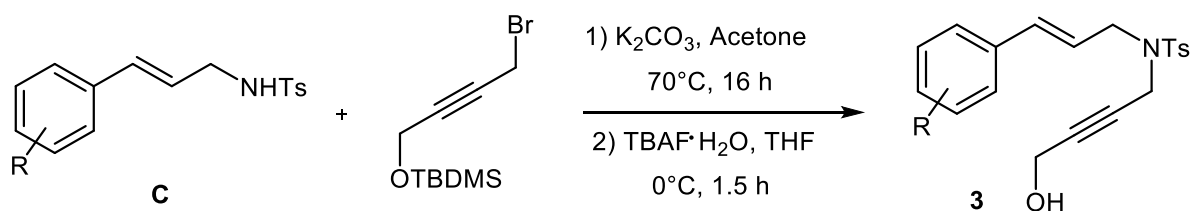

The desired cinnamyl-benzensulphonamide **C** (1 equiv.) was dissolved in acetone and then  $K_2CO_3$  (2 equiv.) was added. After 15 minutes, ((4-bromobut-2-yn-1-yl)oxy)(tert-butyl)dimethylsilane (1.5 equiv.) was syringed and the resulting mixture was stirred overnight at  $70^\circ C$ . Upon complete conversion, the reaction was diluted with water and the solution was extracted with EtOAc (3 x 30 mL). The combined organic phases were dried over anhydrous  $Na_2SO_4$ , filtered and concentrated under reduced pressure. The crude was dissolved in THF (0.4 M), cooled at  $0^\circ C$  and subsequently  $TBAF \cdot H_2O$  (1.3 equiv.) was added to the mixture. The reaction was stirred for 1.5 hours. Upon complete conversion, the reaction was diluted with a saturated solution of  $NH_4Cl$  and extracted with EtOAc (3 x 20 mL). The combined organic extracts were dried over anhydrous  $Na_2SO_4$ , concentrated under reduced pressure and purified by column chromatography (eluent: gradient hexane/ethyl acetate).

### Gold catalyst B

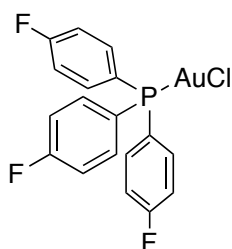

Complex **B** has been prepared following the reported procedure.<sup>[4]</sup> Spectra correspond to the literature.<sup>[4]</sup>  $^{31}\text{P}$  NMR (162 MHz,  $\text{CDCl}_3$ )  $\delta$  30.8.

### Gold catalyst C

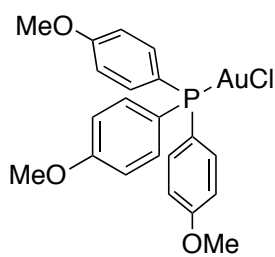

Complex **B** has been prepared following the reported procedure.<sup>[5]</sup> Spectra correspond to the literature.<sup>[5]</sup>  $^{31}\text{P}$  NMR (162 MHz,  $\text{CDCl}_3$ )  $\delta$  29.3.

### Gold catalyst E

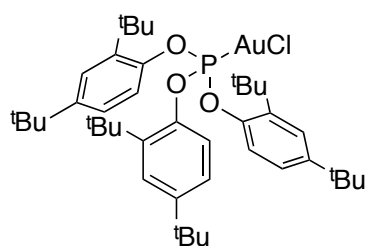

Complex **E** has been prepared following the reported procedure.<sup>[6]</sup> Spectra correspond to the literature.<sup>[6]</sup>  $^{31}\text{P}$  NMR (162 MHz,  $\text{CDCl}_3$ )  $\delta$  100.8.

#### 4-(cinnamyloxy)but-2-yn-1-ol (**1a**)

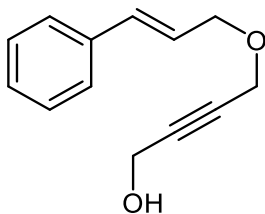

**1a** was isolated following the reported procedure.<sup>[2]</sup> Spectra correspond to the literature.<sup>[2]</sup> **<sup>1</sup>H NMR** (300 MHz, CDCl<sub>3</sub>) δ 7.43 – 7.27 (m, 5H), 6.66 (d, *J* = 16.0 Hz, 1H), 6.30 (dt, *J* = 15.9, 6.2 Hz, 1H), 4.35 (s, 2H), 4.26 – 4.24 (m, 4H).

#### (*E*)-4-[(3-(3-fluoro-4-methylphenyl)allyl)oxy]but-2-yn-1-ol (**1b**)

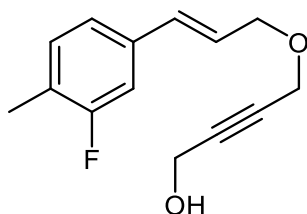

**1b** was isolated following procedure **GP-2** using but-2-yne-1,4-diol (925 mg, 10.8 mmol) and (*E*)-3-(3-fluoro-4-methylphenyl)allyl acetate (448 mg, 2.1 mmol). Purification by column chromatography afforded **1b** (39%, 196 mg, 0.8 mmol) as a brown oil. **<sup>1</sup>H NMR** (400 MHz, CDCl<sub>3</sub>) δ 7.13 – 7.01 (m, 3H), 6.56 (d, *J* = 15.9 Hz, 1H), 6.22 (dt, *J* = 15.9, 6.1 Hz, 1H), 4.32 (s, 2H), 4.23 – 4.20 (m, 4H), 2.25 (s, 3H). **<sup>13</sup>C NMR** (101 MHz, CDCl<sub>3</sub>) δ 161.5 (d, <sup>1</sup>*J*<sub>C-F</sub> = 244.2 Hz, C<sub>q</sub>), 136.2 (d, <sup>4</sup>*J*<sub>C-F</sub> = 7.8 Hz, C<sub>q</sub>), 132.2 (d, <sup>8</sup>*J*<sub>C-F</sub> = 2.2 Hz, CH), 131.5 (d, <sup>5</sup>*J*<sub>C-F</sub> = 5.3 Hz, CH), 125.4 (CH), 124.4 (d, <sup>3</sup>*J*<sub>C-F</sub> = 17.6 Hz, C<sub>q</sub>), 122.1 (d, <sup>7</sup>*J*<sub>C-F</sub> = 3.2 Hz, CH), 112.6 (d, <sup>2</sup>*J*<sub>C-F</sub> = 22.8 Hz, CH), 84.9 (C<sub>q</sub>), 81.6 (C<sub>q</sub>), 70.2 (CH<sub>2</sub>), 57.5 (CH<sub>2</sub>), 51.1 (CH<sub>2</sub>), 14.4 (d, <sup>6</sup>*J*<sub>C-F</sub> = 3.6 Hz, CH<sub>3</sub>). **<sup>19</sup>F NMR** (565 MHz, CDCl<sub>3</sub>) δ -117.7. **LC-MS** calcd for C<sub>14</sub>H<sub>15</sub>FNaO<sub>2</sub> [M+Na]<sup>+</sup> 257.10, found 257.19.

**(E)-4-[(3-(4-chlorophenyl)allyl)oxy]but-2-yn-1-ol (1c)**

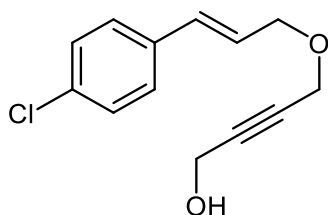

**1c** was isolated following procedure **GP-2** using but-2-yne-1,4-diol (851 mg, 9.9 mmol) and (*E*)-3-(4-chlorophenyl)allyl acetate (417 mg, 1.9 mmol). Purification by column chromatography afforded **1c** (54%, 255 mg, 1.1 mmol) as a pale yellow oil.  $^1\text{H NMR}$  (300 MHz,  $\text{CDCl}_3$ )  $\delta$  7.33 – 7.26 (m, 4H), 6.59 (d,  $J = 16.0$  Hz, 1H), 6.25 (dt,  $J = 15.9, 6.0$  Hz, 1H), 4.33 (t,  $J = 1.8$  Hz, 2H), 4.24 (t,  $J = 1.8$  Hz, 2H), 4.21 (dd,  $J = 6.1, 1.4$  Hz, 2H).  $^{13}\text{C NMR}$  (75 MHz,  $\text{CDCl}_3$ )  $\delta$  135.0 ( $\text{C}_q$ ), 133.5 ( $\text{C}_q$ ), 131.9 (CH), 128.8 (CH), 127.7 (CH), 125.8 (CH), 84.8 ( $\text{C}_q$ ), 81.7 ( $\text{C}_q$ ), 70.2 ( $\text{CH}_2$ ), 57.5 ( $\text{CH}_2$ ), 51.2 ( $\text{CH}_2$ ). **LC-MS** calcd for  $\text{C}_{13}\text{H}_{13}\text{ClNaO}_2$   $[\text{M}+\text{Na}]^+$  259.05, found 259.12.

**(E)-4-[(3-(naphthalen-1-yl)allyl)oxy]but-2-yn-1-ol (1d)**

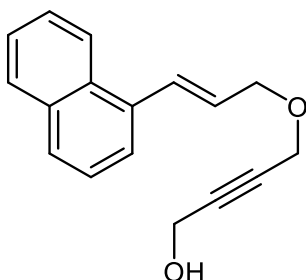

**1d** was isolated following procedure **GP-2** using but-2-yne-1,4-diol (1040 mg, 12.0 mmol) and (*E*)-3-(4-chlorophenyl)allyl acetate (550 mg, 2.4 mmol). Purification by column chromatography afforded **1d** (32%, 200 mg, 0.8 mmol) as a yellow oil.  $^1\text{H NMR}$  (400 MHz,  $\text{CDCl}_3$ )  $\delta$  8.12 (d,  $J = 7.8$  Hz, 1H), 7.86 (d,  $J = 7.1$  Hz, 1H), 7.79 (d,  $J = 8.2$  Hz, 1H), 7.61 (d,  $J = 7.2$  Hz, 1H), 7.54 – 7.45 (m, 3H), 7.41 (d,  $J = 15.8$  Hz, 1H), 6.31 (dt,  $J = 15.7, 6.1$  Hz, 1H), 4.35 – 4.31 (m, 6H), 2.10 (s, 1H).  $^{13}\text{C NMR}$  (101 MHz,  $\text{CDCl}_3$ )  $\delta$  134.3 ( $\text{C}_q$ ), 133.6 ( $\text{C}_q$ ), 131.1 ( $\text{C}_q$ ), 130.5 (CH), 128.6 (CH), 128.3 (CH), 128.2 (CH), 126.1 (CH), 125.8 (CH), 125.6 (CH), 124.0 (CH), 123.8 (CH), 85.0 ( $\text{C}_q$ ), 81.6 ( $\text{C}_q$ ), 70.6 ( $\text{CH}_2$ ), 57.6 ( $\text{CH}_2$ ), 51.0 ( $\text{CH}_2$ ). **LC-MS** calcd for  $\text{C}_{17}\text{H}_{16}\text{NaO}_2$   $[\text{M}+\text{Na}]^+$  245.10, found 245.16.



**(E)-4-[(3-(naphthalen-2-yl)allyl)oxy]but-2-yn-1-ol (1e)**

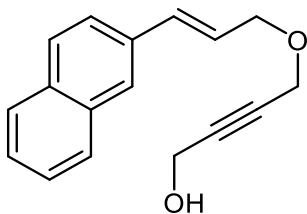

**1e** was isolated following procedure **GP-2** using but-2-yne-1,4-diol (732 mg, 8.5 mmol) and (*E*)-3-(naphthalen-2-yl)allyl acetate (385 mg, 1.7 mmol). Purification by column chromatography afforded **1e** (43%, 184 mg, 0.7 mmol) as a pale yellow wax.  $^1\text{H NMR}$  (300 MHz,  $\text{CDCl}_3$ )  $\delta$  7.82 – 7.74 (m, 4H), 7.61 (dd,  $J$  = 8.6, 1.7 Hz, 1H), 7.49 – 7.42 (m, 2H), 6.81 (d,  $J$  = 16.0 Hz, 1H), 6.41 (dt,  $J$  = 15.8, 6.2 Hz, 1H), 4.36 – 4.27 (m, 6H).  $^{13}\text{C NMR}$  (101 MHz,  $\text{CDCl}_3$ )  $\delta$  134.0 ( $\text{C}_q$ ), 133.6 ( $\text{C}_q$ ), 133.5 (CH), 133.1 ( $\text{C}_q$ ), 128.3 (CH), 128.0 (CH), 127.7 (CH), 126.7 (CH), 126.3 (CH), 126.0 (CH), 125.5 (CH), 123.5 (CH), 84.8 ( $\text{C}_q$ ), 81.8 ( $\text{C}_q$ ), 70.5 ( $\text{CH}_2$ ), 57.5 ( $\text{CH}_2$ ), 51.2 ( $\text{CH}_2$ ). **LC-MS** calcd for  $\text{C}_{17}\text{H}_{16}\text{NaO}_2$   $[\text{M}+\text{Na}]^+$  275.10, found 275.19.

**4-(cinnamyloxy)-4-phenylbut-2-yn-1-ol (1f)**

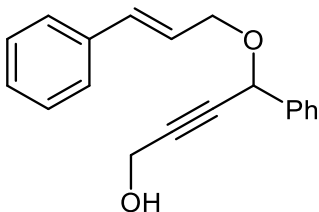

**1f** was isolated following procedure **GP-1** using (*E*)-(1-(cinnamyloxy)prop-2-yn-1-yl)benzene (500 mg, 2.0 mmol) and paraformaldehyde (181 mg, 6.0 mmol). Purification by column chromatography afforded **1f** (40 %, 224 mg, 0.8 mmol) as a pale yellow oil.  $^1\text{H NMR}$  (300 MHz,  $\text{CDCl}_3$ )  $\delta$  7.57 – 7.54 (m, 2H), 7.45 – 7.28 (m, 8H), 6.68 (d,  $J$  = 16.0 Hz, 1H), 6.35 (dt,  $J$  = 15.9, 6.2 Hz, 1H), 5.32 (s, 1H), 4.38 (s, 2H), 4.35 – 4.29 (m, 2H), 1.96 (s, 1H).  $^{13}\text{C NMR}$  (101 MHz,  $\text{CDCl}_3$ )  $\delta$  138.4 ( $\text{C}_q$ ), 136.6 ( $\text{C}_q$ ), 133.4 (CH), 128.7 (CH), 128.6 (CH), 128.6 (CH), 127.9 (CH), 127.5 (CH), 126.6 (CH), 125.4 (CH), 86.1 ( $\text{C}_q$ ), 83.5 ( $\text{C}_q$ ), 70.7 ( $\text{CH}_2$ ), 69.0 (CH), 51.0 ( $\text{CH}_2$ ). **LC-MS** calcd for  $\text{C}_{14}\text{H}_{16}\text{NaO}_2$   $[\text{M}+\text{Na}]^+$  301.12 found 301.16.

#### 4-(cinnamyloxy)pent-2-yn-1-ol (**1g**)

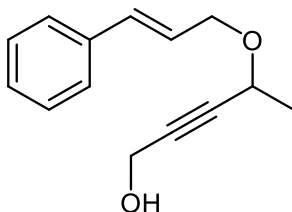

**1g** was isolated following procedure **GP-1** using (*E*)-(3-(but-3-yn-2-yloxy)prop-1-en-1-yl)benzene (432 mg, 2.3 mmol) and paraformaldehyde (209 mg, 7.0 mmol). Purification by column chromatography afforded **1g** (36%, 183 mg, 0.8 mmol) as a pale yellow oil.  $^1\text{H NMR}$  (300 MHz,  $\text{CDCl}_3$ )  $\delta$  7.43 – 7.26 (m, 5H), 6.66 (d,  $J = 15.9$  Hz, 1H), 6.43 (dt,  $J = 15.9, 6.0$  Hz, 1H), 4.42 (ddd,  $J = 12.4, 5.7, 1.5$  Hz, 1H), 4.35 – 4.31 (m, 3H), 4.16 (ddd,  $J = 12.4, 6.7, 1.3$  Hz, 1H), 1.87 (s, 1H), 1.50 (d,  $J = 6.6$  Hz, 3H).  $^{13}\text{C NMR}$  (75 MHz,  $\text{CDCl}_3$ )  $\delta$  136.6 ( $\text{C}_q$ ), 133.0 (CH), 128.6 (CH), 127.8 (CH), 126.5 (CH), 125.5 (CH), 85.6 ( $\text{C}_q$ ), 83.3 ( $\text{C}_q$ ), 69.3 ( $\text{CH}_2$ ), 64.5 (CH), 51.1 ( $\text{CH}_2$ ), 22.1 ( $\text{CH}_3$ ). **LC-MS** calcd for  $\text{C}_{14}\text{H}_{16}\text{NaO}_2$   $[\text{M}+\text{Na}]^+$  239,11, found 239.15.

#### *N*-cinnamyl-*N*-(4-hydroxybut-2-yn-1-yl)-4-methylbenzenesulfonamide (**3a**)

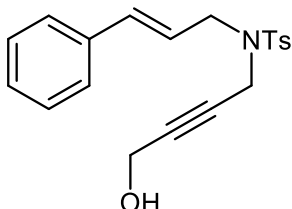

**3a** was isolated following procedure **GP-1** using *N*-cinnamyl-4-methyl-*N*-(prop-2-yn-1-yl)benzenesulfonamide (2.83 g, 8.7 mmol) and paraformaldehyde (784 mg, 26.1 mmol). Purification by column chromatography afforded **3a** (60 %, 1.86 g, 8.7 mmol) as a white solid. **M. p.** = (75 – 78) °C  $^1\text{H NMR}$  (300 MHz,  $\text{CDCl}_3$ )  $\delta$  7.77 (d,  $J = 8.2$  Hz, 2H), 7.33 – 7.24 (m, 7H), 6.56 (d,  $J = 15.8$  Hz, 1H), 6.08 (dt,  $J = 15.7, 6.8$  Hz, 1H), 4.13 (s, 2H), 4.00 – 3.98 (m, 4H), 2.44 (s, 3H), 1.43 (brs, 1H).  $^{13}\text{C NMR}$  (75 MHz,  $\text{CDCl}_3$ )  $\delta$  143.7 ( $\text{C}_q$ ), 136.2 ( $\text{C}_q$ ), 136.1 ( $\text{C}_q$ ), 134.8 (CH), 129.5 (CH), 128.7 (CH), 128.1 (CH), 128.0 (CH), 126.5 (CH), 123.0 (CH), 83.9 ( $\text{C}_q$ ), 78.7 ( $\text{C}_q$ ), 50.8 ( $\text{CH}_2$ ), 48.9 ( $\text{CH}_2$ ), 36.2 ( $\text{CH}_2$ ), 21.5 ( $\text{CH}_3$ ). **LC-MS** calcd for  $\text{C}_{20}\text{H}_{21}\text{NNaO}_3\text{S}$   $[\text{M}+\text{Na}]^+$  378.11, found 378.13.

***N*-cinnamyl-*N*-(4-hydroxybut-2-yn-1-yl)methanesulfonamide (3b)**

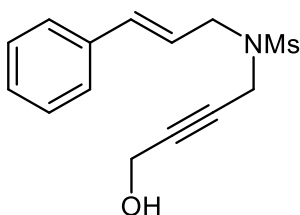

**3b** was isolated following procedure **GP-1** using *N*-cinnamyl-*N*-(prop-2-yn-1-yl)methanesulfonamide (500 mg, 2.0 mmol) and paraformaldehyde (180 mg, 6.0 mmol). Purification by column chromatography afforded **3b** (40 %, 224 mg, 0.8 mmol) as a white solid. **M. p.** = (91 – 95) °C. **<sup>1</sup>H NMR** (300 MHz, CDCl<sub>3</sub>) δ 7.41 – 7.26 (m, 5H), 6.65 (d, *J* = 15.8 Hz, 1H), 6.17 (dt, *J* = 15.8, 6.8 Hz, 1H), 4.32 (t, *J* = 1.7 Hz, 2H), 4.14 (t, *J* = 1.8 Hz, 2H), 4.05 (d, *J* = 6.8 Hz, 2H), 2.99 (s, 3H). **<sup>13</sup>C NMR** (75 MHz, CDCl<sub>3</sub>) δ 136.0 (C<sub>q</sub>), 135.0 (CH), 128.7 (CH), 128.2 (CH), 126.6 (CH), 122.9 (CH), 84.4 (C<sub>q</sub>), 79.3 (C<sub>q</sub>), 51.0 (CH<sub>2</sub>), 48.9 (CH<sub>2</sub>), 38.7 (CH<sub>3</sub>), 36.1 (CH<sub>2</sub>). **LC-MS** calcd for C<sub>14</sub>H<sub>17</sub>NNaO<sub>3</sub>S [M+Na]<sup>+</sup> 302.08, found 302.15.

***(E)*-*N*-(4-hydroxybut-2-yn-1-yl)-4-methyl-*N*-(3-(*o*-tolyl)allyl)benzenesulfonamide (3c)**

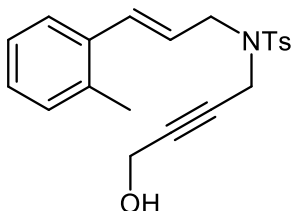

**3c** was isolated following procedure **GP-1** using *(E)*-4-methyl-*N*-(prop-2-yn-1-yl)-*N*-(3-(*o*-tolyl)allyl)benzenesulfonamide (399 mg, 1.2 mmol) and paraformaldehyde (106 mg, 3.5 mmol). Purification by column chromatography afforded **3c** (42%, 189 mg, 0.5 mmol) as a yellow solid. **M. p.** = (76 – 79) °C. **<sup>1</sup>H NMR** (400 MHz, CDCl<sub>3</sub>) δ 7.78 (d, *J* = 8.4 Hz, 2H), 7.37 – 7.32 (m, 3H), 7.18 – 7.12 (m, 3H), 6.79 (d, *J* = 15.7 Hz, 1H), 5.95 (dt, *J* = 15.6, 6.8 Hz, 1H), 4.15 (t, *J* = 1.9 Hz, 2H), 4.02 – 4.00 (m, 4H), 2.44 (s, 3H), 2.31 (s, 3H), 1.40 (brs, 1H). **<sup>13</sup>C NMR** (101 MHz, CDCl<sub>3</sub>) δ 143.7 (C<sub>q</sub>), 136.1 (C<sub>q</sub>), 135.5 (C<sub>q</sub>), 135.2 (C<sub>q</sub>), 133.0 (CH), 130.4 (CH), 129.5 (CH), 128.0 (2CH), 126.2 (CH), 125.8 (CH), 124.2 (CH), 83.9 (C<sub>q</sub>), 78.7 (C<sub>q</sub>), 50.8 (CH<sub>2</sub>), 49.1 (CH<sub>2</sub>), 36.2 (CH<sub>2</sub>), 21.5 (CH<sub>3</sub>), 19.8 (CH<sub>3</sub>). **LC-MS** calcd for C<sub>21</sub>H<sub>23</sub>NNaO<sub>3</sub>S [M+Na]<sup>+</sup> 392.13, found 392.20

**(E)-N-[3-(3-(benzyloxy)phenyl)allyl]-N-(4-hydroxybut-2-yn-1-yl)-4-methylbenzenesulfonamide (3d)**

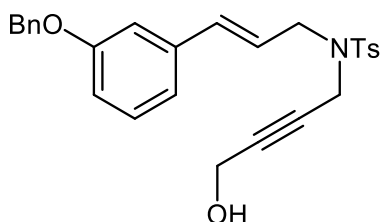

**3d** was isolated following procedure **GP-3** using (*E*)-*N*-(3-(3-(benzyloxy)phenyl)allyl)-4-methylbenzenesulfonamide (879 mg, 2.2 mmol) and ((4-bromobut-2-yn-1-yl)oxy)(tert-butyl)dimethylsilane (880 mg, 3.3 mmol). Purification by column chromatography afforded **3d** (20%, 201 mg, 0.4 mmol) as a white solid. **M. p.** = (82 – 85) °C. **<sup>1</sup>H NMR** (400 MHz, CDCl<sub>3</sub>) δ 7.77 (d, *J* = 8.3 Hz, 2H), 7.45 – 7.35 (m, 5H), 7.33 (d, *J* = 8.2 Hz, 2H), 7.23 (t, *J* = 7.9 Hz, 1H), 6.96– 6.87 (m, 3H), 6.53 (d, *J* = 15.8 Hz, 1H), 6.07 (dt, *J* = 15.7, 6.8 Hz, 1H), 5.06 (s, 2H), 4.13 (s, 2H), 4.00 – 3.97 (m, 4H), 2.43 (s, 3H). **<sup>13</sup>C NMR** (101 MHz, CDCl<sub>3</sub>) δ 159.1 (C<sub>q</sub>), 143.7 (C<sub>q</sub>), 137.6 (C<sub>q</sub>), 136.9 (C<sub>q</sub>), 136.2 (C<sub>q</sub>), 134.7 (CH), 129.7 (CH), 129.5 (CH), 128.6 (CH), 128.1 (CH), 128.0 (CH), 127.5 (CH), 123.4 (CH), 119.5 (CH), 114.6 (CH), 112.9 (CH), 83.9 (C<sub>q</sub>), 78.7 (C<sub>q</sub>), 70.0 (CH<sub>2</sub>), 50.8 (CH<sub>2</sub>), 48.8 (CH<sub>2</sub>), 36.3 (CH<sub>2</sub>), 21.6 (CH<sub>3</sub>). **LC-MS** calcd for C<sub>27</sub>H<sub>27</sub>NNaO<sub>4</sub>S [M+Na]<sup>+</sup> 484.15 found 484.19

**(E)-N-(4-hydroxybut-2-yn-1-yl)-N-(3-(4-methoxyphenyl)allyl)-4-methylbenzenesulfonamide (3e)**

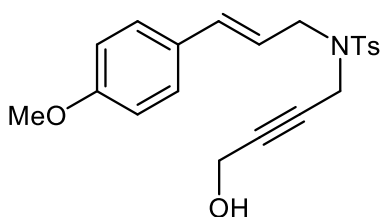

**3e** was isolated following procedure **GP-3** using (*E*)-*N*-(3-(4-methoxyphenyl)allyl)-4-methylbenzenesulfonamide (293 mg, 0.9 mmol) and ((4-bromobut-2-yn-1-yl)oxy)(tert-butyl)dimethylsilane (364 mg, 1.4 mmol). Purification by column chromatography afforded **3e** (33%, 120 mg, 0.3 mmol) as a white solid. **M. p.** = (83 – 87) °C. **<sup>1</sup>H NMR** (400 MHz, CDCl<sub>3</sub>) δ 7.79 (d, *J* = 8.3 Hz, 2H), 7.34 (d, *J* = 8.0 Hz, 2H), 7.29 (d, *J* = 8.7 Hz, 2H), 6.87 (d, *J* = 8.7 Hz, 2H), 6.52 (d, *J* = 15.8 Hz, 1H), 5.95 (dt, *J* = 15.7, 6.9 Hz, 1H), 4.15 (s, 2H), 4.03 – 3.97 (m, 4H), 3.83 (s, 3H), 2.46 (s, 3H), 1.32 (brs, 1H). **<sup>13</sup>C NMR** (101 MHz, CDCl<sub>3</sub>) δ 159.6 (C<sub>q</sub>), 143.6 (C<sub>q</sub>), 136.3 (C<sub>q</sub>), 134.4 (CH), 129.4

(CH), 128.9 (C<sub>q</sub>), 128.0 (CH), 127.8 (CH), 120.6 (CH), 114.1 (CH), 83.8 (C<sub>q</sub>), 78.8 (C<sub>q</sub>), 55.3 (CH<sub>3</sub>), 50.8 (CH<sub>2</sub>), 49.0 (CH<sub>2</sub>), 36.1 (CH<sub>2</sub>), 21.5 (CH<sub>3</sub>). **LC-MS** calcd for C<sub>21</sub>H<sub>23</sub>NNaO<sub>4</sub>S [M+Na]<sup>+</sup> 408.20, found 408.17.

**(E)-N-(3-(4-chlorophenyl)allyl)-N-(4-hydroxybut-2-yn-1-yl)-4-methylbenzenesulfonamide (3f)**

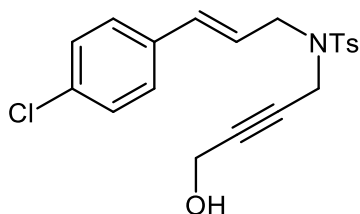

**3f** was isolated following procedure **GP-3** using (*E*)-*N*-(3-(4-chlorophenyl)allyl)-4-methylbenzenesulfonamide (413 mg, 1.3 mmol) and ((4-bromobut-2-yn-1-yl)oxy)(tert-butyl)dimethylsilane (505 mg, 1.9 mmol). Purification by column chromatography afforded **3f** (31%, 155 mg, 0.4 mmol) as a white solid. **M. p.** = (73 – 76) °C. **<sup>1</sup>H NMR** (400 MHz, CDCl<sub>3</sub>) δ 7.77 (d, *J* = 8.3 Hz, 2H), 7.33 (d, *J* = 8.1 Hz, 2H), 7.29 – 7.24 (m, 4H), 6.52 (d, *J* = 15.8 Hz, 1H), 6.07 (dt, *J* = 15.8, 6.7 Hz, 1H), 4.13 (t, *J* = 1.7 Hz, 2H), 4.01 (t, *J* = 1.8 Hz, 2H), 3.98 (d, *J* = 5.8 Hz, 2H), 2.44 (s, 3H). **<sup>13</sup>C NMR** (101 MHz, CDCl<sub>3</sub>) δ 143.7 (C<sub>q</sub>), 136.2 (C<sub>q</sub>), 134.6 (C<sub>q</sub>), 133.8 (C<sub>q</sub>), 133.4 (CH), 129.5 (CH), 128.8 (CH), 128.0 (CH), 127.7 (CH), 123.9 (CH), 83.9 (C<sub>q</sub>), 78.6 (C<sub>q</sub>), 50.8 (CH<sub>2</sub>), 48.7 (CH<sub>2</sub>), 36.4 (CH<sub>2</sub>), 21.5 (CH<sub>3</sub>). **LC-MS** calcd for C<sub>20</sub>H<sub>20</sub>ClNNaO<sub>3</sub>S [M+Na]<sup>+</sup> 412.08, found 412.14.

**(E)-N-(4-hydroxybut-2-yn-1-yl)-4-methyl-N-(3-(naphthalen-2-yl)allyl)benzenesulfonamide (3g)**

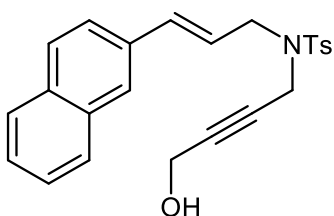

**3g** was isolated following procedure **GP-3** using (*E*)-4-methyl-*N*-(3-(naphthalen-2-yl)allyl)benzenesulfonamide (610 mg, 1.8 mmol) and ((4-bromobut-2-yn-1-yl)oxy)(tert-butyl)dimethylsilane (714 mg, 2.7 mmol). Purification by column chromatography afforded **3g** (18%, 175 mg, 0.3 mmol) as a yellow solid. **M. p.** = (78 – 81) °C. **<sup>1</sup>H NMR** (300 MHz, CDCl<sub>3</sub>) δ 7.81 – 7.77 (m, 5H), 7.69 (s, 1H), 7.55 – 7.52 (m, 1H), 7.48 – 7.44 (m, 2H), 7.34 (d, *J* = 8.0 Hz, 2H), 6.73 (d, *J* =

15.8 Hz, 1H), 6.21 (dt,  $J = 15.8, 6.8$  Hz, 1H), 4.17 (t,  $J = 1.7$  Hz, 2H), 4.05 – 4.02 (m, 4H), 2.44 (s, 3H).  $^{13}\text{C}$  NMR (101 MHz,  $\text{CDCl}_3$ )  $\delta$  143.7 ( $\text{C}_q$ ), 136.3 ( $\text{C}_q$ ), 134.9 (CH), 133.5 ( $\text{C}_q$ ), 133.5 ( $\text{C}_q$ ), 133.2 ( $\text{C}_q$ ), 129.5 (CH), 128.4 (CH), 128.0 (CH), 128.0 (CH), 127.7 (CH), 126.8 (CH), 126.4 (CH), 126.2 (CH), 123.4 (CH), 123.4 (CH), 84.0 ( $\text{C}_q$ ), 78.7 ( $\text{C}_q$ ), 50.8 ( $\text{CH}_2$ ), 49.0 ( $\text{CH}_2$ ), 36.3 ( $\text{CH}_2$ ), 21.5 ( $\text{CH}_3$ ). LC-MS calcd for  $\text{C}_{24}\text{H}_{23}\text{NNaO}_3\text{S}$  [ $\text{M}+\text{Na}$ ] $^+$  428.13, found 428.18.

**(*E*)-*N*-(3-(furan-3-yl)allyl)-*N*-(4-hydroxybut-2-yn-1-yl)-4-methylbenzenesulfonamide (3h)**

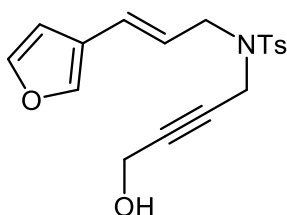

**3h** was isolated following procedure **GP-1** using (*E*)-*N*-(3-(furan-3-yl)allyl)-4-methyl-*N*-(prop-2-yn-1-yl)benzenesulfonamide (270 mg, 0.9 mmol) and paraformaldehyde (77 mg, 2.6 mmol). Purification by column chromatography afforded **3h** (30 %, 88 mg, 0.2 mmol) as a yellow solid. **M. p.** = (85 – 89) °C.  $^1\text{H}$  NMR (400 MHz,  $\text{CDCl}_3$ )  $\delta$  7.76 (d,  $J = 8.3$  Hz, 2H), 7.38 (d,  $J = 16.2$  Hz, 2H), 7.32 (d,  $J = 8.1$  Hz, 2H), 6.47 (s, 1H), 6.43 (d,  $J = 15.8$  Hz, 1H), 5.80 (dt,  $J = 15.6, 6.8$  Hz, 1H), 4.12 (s, 2H), 3.99 (s, 2H), 3.92 (d,  $J = 6.5$  Hz, 2H), 2.43 (s, 3H), 1.29 (brs, 1H).  $^{13}\text{C}$  NMR (101 MHz,  $\text{CDCl}_3$ )  $\delta$  143.7 (CH), 143.7 ( $\text{C}_q$ ), 140.9 (CH), 136.2 ( $\text{C}_q$ ), 129.4 (CH), 128.0 (CH), 124.6 (CH), 123.3 ( $\text{C}_q$ ), 122.6 (CH), 107.5 (CH), 83.8 ( $\text{C}_q$ ), 78.7 ( $\text{C}_q$ ), 50.8 ( $\text{CH}_2$ ), 48.7 ( $\text{CH}_2$ ), 36.1 ( $\text{CH}_2$ ), 21.5 ( $\text{CH}_3$ ). LC-MS calcd for  $\text{C}_{18}\text{H}_{19}\text{NNaO}_4\text{S}$  [ $\text{M}+\text{Na}$ ] $^+$  368.09, found 368.17.

**(*E*)-*N*-(4-hydroxybut-2-yn-1-yl)-4-methyl-*N*-(3-(thiophen-2-yl)allyl)benzenesulfonamide (3i)**

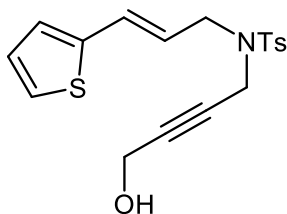

**3i** was isolated following procedure **GP-1** using (*E*)-4-methyl-*N*-(prop-2-yn-1-yl)-*N*-(3-(thiophen-2-yl)allyl)benzenesulfonamide (292 mg, 0.9 mmol) and paraformaldehyde (79 mg, 2.6 mmol). Purification by column chromatography afforded **3i** (37%, 118 mg, 0.3 mmol) as a yellow solid. **M. p.** = (79 – 82) °C.  $^1\text{H}$  NMR (400 MHz,  $\text{CDCl}_3$ )  $\delta$  7.76 (d,  $J = 8.3$  Hz, 2H), 7.32 (d,  $J = 8.1$  Hz, 2H),

7.18 – 7.16 (m, 1H), 6.96 – 6.94 (m, 2H), 6.69 (d,  $J = 15.6$  Hz, 1H), 5.89 (dt,  $J = 15.5, 6.8$  Hz, 1H), 4.13 (s, 2H), 4.00 (t,  $J = 1.8$  Hz, 2H), 3.95 (d,  $J = 6.6$  Hz, 2H), 2.44 (s, 3H).  $^{13}\text{C}$  NMR (101 MHz,  $\text{CDCl}_3$ )  $\delta$  143.8 ( $\text{C}_q$ ), 141.1 ( $\text{C}_q$ ), 136.1 ( $\text{C}_q$ ), 129.5 (CH), 128.0 (CH), 127.8 (CH), 127.5 (CH), 126.4 (CH), 124.9 (CH), 122.5 (CH), 83.9 ( $\text{C}_q$ ), 78.7 ( $\text{C}_q$ ), 50.8 ( $\text{CH}_2$ ), 48.7 ( $\text{CH}_2$ ), 36.3 ( $\text{CH}_2$ ), 21.6 ( $\text{CH}_3$ ). LC-MS calcd for  $\text{C}_{18}\text{H}_{19}\text{NNaO}_3\text{S}_2$   $[\text{M}+\text{Na}]^+$  384.07, found 384.11

**(Z)-N-(4-hydroxybut-2-yn-1-yl)-4-methyl-N-(3-phenylallyl)benzenesulfonamide (3j)**

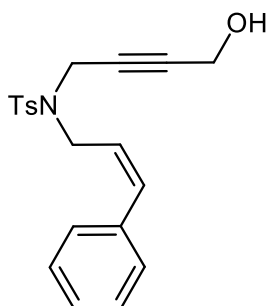

**3j** was isolated following procedure **GP-1** using (Z)-4-methyl-N-(3-phenylallyl)-N-(prop-2-yn-1-yl)benzenesulfonamide (498 mg, 1.53 mmol) and paraformaldehyde (137 mg, 4.59 mmol). Purification by column chromatography afforded **3j** (38%, 207 mg, 0.581 mmol) as a yellow oil.  $^1\text{H}$  NMR (400 MHz,  $\text{CDCl}_3$ )  $\delta$  7.73 (d,  $J = 8.3$  Hz, 2H), 7.30 (m, 7H), 6.72 (d,  $J = 11.6$  Hz, 1H), 5.64 (dt,  $J = 11.6, 6.9$  Hz, 1H), 4.15 (dd,  $J = 6.9, 1.5$  Hz, 2H), 4.10 (s, 2H), 3.72 (s, 2H), 2.44 (s, 3H).  $^{13}\text{C}$  NMR (101 MHz,  $\text{CDCl}_3$ )  $\delta$  143.7 ( $\text{C}_q$ ), 136.2 ( $\text{C}_q$ ), 135.9 ( $\text{C}_q$ ), 134.0 (CH), 129.5 (CH), 128.9 (CH), 128.2 (CH), 127.8 (CH), 127.3 (CH), 126.1 (CH), 83.9 ( $\text{C}_q$ ), 78.2 ( $\text{C}_q$ ), 50.4 ( $\text{CH}_2$ ), 44.1 ( $\text{CH}_2$ ), 36.4 ( $\text{CH}_2$ ), 21.5 ( $\text{CH}_3$ ). LC-MS calcd for  $\text{C}_{20}\text{H}_{21}\text{NNaO}_3\text{S}$   $[\text{M}+\text{Na}]^+$  378.11, found 378.20.

## Synthesis of products

### Catalytic Synthesis of 2 and 4 (GP-4)

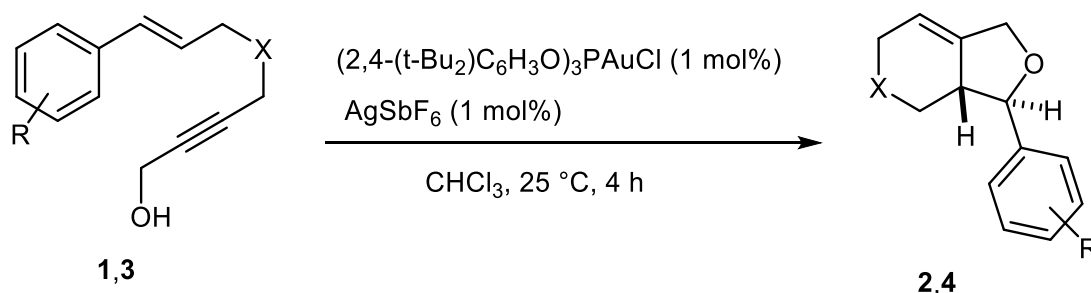

$(2,4-(t\text{-Bu}_2)\text{C}_6\text{H}_3\text{O})_3\text{PAuCl}$  (1.8 and 1.2 mg for reagents **1** and **3**, respectively, 1 mol%) was dissolved in 1.0 mL of freshly degassed  $\text{CHCl}_3$  under  $\text{N}_2$  in a 10 mL two-necked round bottom flask. The substrate (0.2 mmol and 0.14 mmol for reagents **1** and **3**, respectively, 1 equiv.) and  $\text{AgSbF}_6$  (a tip of a spatula) were then added and the mixture was stirred at room temperature. The reaction was monitored by TLC. Upon complete conversion, the solution was diluted with DCM (5 mL) and purified by column chromatography (eluent: gradient hexane/ethyl acetate).

### 3-phenyl-3,3a,4,6-tetrahydro-1H-furo[3,4-c]pyran (**2a**)

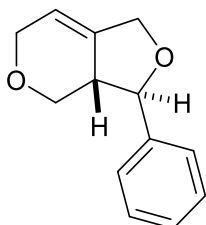

The procedure **GP-4** was followed using **1a** (40.4 mg, 0.20 mmol). Purification by column chromatography (eluent: gradient hexane/ethyl acetate.) yielded **2a** as a pale yellow oil (56%, 22.2 mg, 0.11 mmol, *d.r.* > 25:1).  $R_f = 0.45$  (eluent: Hexane/ethyl acetate = 8:2).  $^1\text{H NMR}$  (300 MHz,  $\text{CDCl}_3$ )  $\delta$  7.40 – 7.33 (m, 5H), 5.65 (s, 1H), 4.73 (d,  $J = 12.4$  Hz, 1H), 4.48 (d,  $J = 12.5$  Hz, 1H), 4.35 (d,  $J = 9.9$  Hz, 1H), 4.29 – 4.22 (m, 1H), 4.16 – 4.11 (m, 2H), 3.34 (t,  $J = 10.1$  Hz, 1H), 2.79 (brs, 1H).  $^{13}\text{C NMR}$  (75 MHz,  $\text{CDCl}_3$ )  $\delta$  140.4 ( $\text{C}_q$ ), 138.8 ( $\text{C}_q$ ), 128.6 (CH), 128.1 (CH), 126.0 (CH), 116.2 (CH), 83.4 (CH), 69.7 ( $\text{CH}_2$ ), 65.9 ( $\text{CH}_2$ ), 64.3 ( $\text{CH}_2$ ), 46.5 (CH). **LC-MS** calcd for  $\text{C}_{13}\text{H}_{14}\text{NaO}_2$   $[\text{M}+\text{Na}]^+$  225.09, found 225.12.



### 3-(3-fluoro-4-methylphenyl)-3,3a,4,6-tetrahydro-1H-furo[3,4-c]pyran (2b)

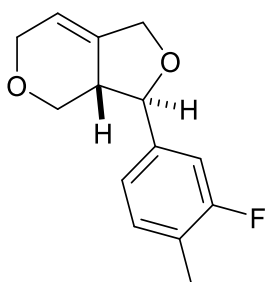

The procedure **GP-4** was followed using **1b** (46.8 mg, 0.20 mmol). Purification by column chromatography (eluent: gradient hexane/ethyl acetate.) yielded **2b** as a pale yellow oil (33%, 16.4 mg, 0.07 mmol, *d.r.* > 25:1).  $R_f = 0.41$  (eluent: Hexane/ethyl acetate = 8:2).  $^1\text{H NMR}$  (300 MHz,  $\text{CDCl}_3$ )  $\delta$  7.19 – 7.13 (m, 1H), 7.05 – 6.97 (m, 2H), 5.63 (s, 1H), 4.68 (d,  $J = 12.3$  Hz, 1H), 4.44 (d,  $J = 12.6$  Hz, 1H), 4.27 (d,  $J = 9.8$  Hz, 1H), 7.21 – 7.07 (m, 3H), 3.30 (t,  $J = 10.1$  Hz, 1H), 2.70 (brs, 1H), 2.27 (s, 3H).  $^{13}\text{C NMR}$  (75 MHz,  $\text{CDCl}_3$ )  $\delta$  161.4 (d,  $^1J_{\text{C-F}} = 245.0$  Hz,  $\text{C}_q$ ), 140.3 (d,  $^4J_{\text{C-F}} = 7.2$  Hz,  $\text{C}_q$ ), 138.5 ( $\text{C}_q$ ), 131.6 (d,  $^5J_{\text{C-F}} = 5.4$  Hz, CH), 124.5 (d,  $^3J_{\text{C-F}} = 17.3$  Hz,  $\text{C}_q$ ), 121.2 (d,  $^7J_{\text{C-F}} = 3.3$  Hz, CH), 116.4 (CH), 112.5 (d,  $^2J_{\text{C-F}} = 23.1$  Hz, CH), 82.6 (d,  $^8J_{\text{C-F}} = 1.6$  Hz, CH), 69.7 ( $\text{CH}_2$ ), 65.8 ( $\text{CH}_2$ ), 64.3 ( $\text{CH}_2$ ), 46.6 (CH), 14.4 (d,  $^6J_{\text{C-F}} = 3.5$  Hz,  $\text{CH}_3$ ).  $^{19}\text{F NMR}$  (565 MHz,  $\text{CDCl}_3$ )  $\delta$  -117.0. **LC-MS** calcd for  $\text{C}_{14}\text{H}_{15}\text{FNaO}_2$   $[\text{M}+\text{Na}]^+$  257.10 found 257.12.

### 3-(4-chlorophenyl)-3,3a,4,6-tetrahydro-1H-furo[3,4-c]pyran (2c)

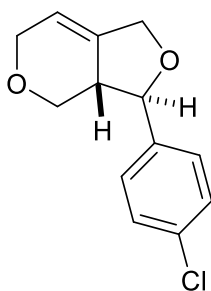

The procedure **GP-4** was followed using **1c** (47.3 mg, 0.20 mmol). Purification by column chromatography (eluent: gradient hexane/ethyl acetate.) yielded **2c** as a colourless oil (51%, 23.7 mg, 0.10 mmol, *d.r.* > 25:1).  $R_f = 0.30$  (eluent: Hexane/ethyl acetate = 8:2).  $^1\text{H NMR}$  (400 MHz,  $\text{CDCl}_3$ )  $\delta$  7.34 (d,  $J = 8.6$  Hz, 2H), 7.28 (d,  $J = 8.5$  Hz, 2H), 5.64 (s, 1H), 4.69 (d,  $J = 12.6$  Hz, 1H), 4.45 (d,  $J = 12.6$  Hz, 1H), 4.29 (d,  $J = 9.9$  Hz, 1H), 4.25 – 4.20 (m, 1H), 4.146 – 4.06 (m, 2H), 3.30 (t,  $J = 10.2$  Hz, 1H), 2.69 (brs, 1H).  $^{13}\text{C NMR}$  (101 MHz,  $\text{CDCl}_3$ )  $\delta$  139.0 ( $\text{C}_q$ ), 138.4 ( $\text{C}_q$ ), 133.7 ( $\text{C}_q$ ), 128.8

(CH), 127.3 (CH), 116.5 (CH), 82.7 (CH), 69.8 (CH<sub>2</sub>), 65.7 (CH<sub>2</sub>), 64.3 (CH<sub>2</sub>), 46.7 (CH). **LC-MS** calcd for C<sub>13</sub>H<sub>13</sub>ClNaO<sub>2</sub> [M+Na]<sup>+</sup> 259,05 found 259.09.

### 3-(naphthalen-1-yl)-5-tosyl-1,3,3a,4,5,6-hexahydrofuro[3,4-c]pyridine (**2d**)

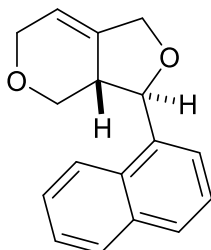

The procedure **GP-4** was followed using **1d** (50.4 mg, 0.20 mmol). Purification by column chromatography (eluent: gradient hexane/ethyl acetate.) yielded **2d** as a white solid (40 %, 20.2 mg, 0.08 mmol, *d.r.* > 25:1). **M. p.** = (98 – 100) °C. **R<sub>f</sub>** = 0.35 (eluent: Hexane/ethyl acetate = 8:2). **<sup>1</sup>H NMR** (300 MHz, CDCl<sub>3</sub>) δ 8.09 – 8.05 (m, 1H), 7.90 – 7.87 (m, 1H), 7.84 (d, *J* = 8.2 Hz, 1H), 7.69 (d, *J* = 7.1 Hz, 1H), 7.55 – 7.47 (m, 3H), 5.70 (bs, 1H), 5.08 (d, *J* = 10.0 Hz, 1H), 4.83 – 4.78 (m, 1H), 4.61 – 4.56 (m, 1H), 4.31 – 4.09 (m, 3H), 3.42 (t, *J* = 10.2 Hz, 1H), 3.12 (brs, 1H). **<sup>13</sup>C NMR** (75 MHz, CDCl<sub>3</sub>) δ 139.0 (C<sub>q</sub>), 135.3 (C<sub>q</sub>), 133.9 (C<sub>q</sub>), 131.3 (C<sub>q</sub>), 128.9 (CH), 128.8 (CH), 126.2 (CH), 125.7 (CH), 125.5 (CH), 123.6 (CH), 123.3 (CH), 116.3 (CH), 80.6 (CH), 69.6 (CH<sub>2</sub>), 66.5 (CH<sub>2</sub>), 64.5 (CH<sub>2</sub>), 45.4 (CH). **LC-MS** calcd for C<sub>17</sub>H<sub>16</sub>NaO<sub>2</sub> [M+Na]<sup>+</sup> 275.10, found 275.14.

### 3-(naphthalen-2-yl)-3,3a,4,6-tetrahydro-1H-furo[3,4-c]pyran (**2e**)

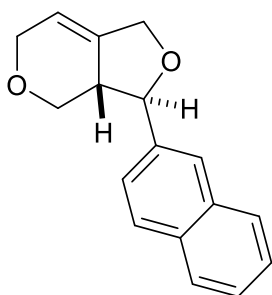

The procedure **GP-4** was followed using **1e** (50.4 mg, 0.20 mmol). Purification by column chromatography (eluent: gradient hexane/ethyl acetate.) yielded **2e** as a white solid (64%, 32.8 mg, 0.13 mmol, *d.r.* > 25:1). **M. p.** = (82 – 85) °C. **R<sub>f</sub>** = 0.30 (eluent: Hexane/ethyl acetate = 8:2). **<sup>1</sup>H NMR** (400 MHz, CDCl<sub>3</sub>) δ 7.88 – 7.81 (m, 4H), 7.51 – 7.46 (m, 3H), 5.66 (s, 1H), 4.77 (d, *J* = 12.5

Hz, 1H), 4.55 – 4.49 (m, 2H), 4.28 – 4.13 (m, 3H), 3.38 (t,  $J = 10.1$  Hz, 1H), 2.86 (s, 1H).  $^{13}\text{C}$  NMR (101 MHz,  $\text{CDCl}_3$ )  $\delta$  138.8 ( $\text{C}_q$ ), 137.9 ( $\text{C}_q$ ), 133.3 ( $\text{C}_q$ ), 133.3 ( $\text{C}_q$ ), 128.5 (CH), 128.0 (CH), 127.7 (CH), 126.2 (CH), 126.0 (CH), 125.0 (CH), 123.8 (CH), 116.3 (CH), 83.6 (CH), 69.9 ( $\text{CH}_2$ ), 66.0 ( $\text{CH}_2$ ), 64.4 ( $\text{CH}_2$ ), 46.6 (CH). LC-MS calcd for  $\text{C}_{17}\text{H}_{16}\text{NaO}_2$   $[\text{M}+\text{Na}]^+$  275.10, found 275.12.

### 3,6-diphenyl-3,3a,4,6-tetrahydro-1H-furo[3,4-c]pyran (2f)

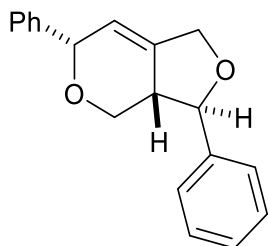

The procedure **GP-4** was followed using **1f** (55.6 mg, 0.20 mmol). Purification by column chromatography (eluent: gradient hexane/ethyl acetate.) yielded **2f** as a yellow oil (55 %, 30.6 mg, 0.11 mmol, *d.r.* > 25:1).  $R_f = 0.55$  (eluent: Hexane/ethyl acetate = 8:2).  $^1\text{H}$  NMR (300 MHz,  $\text{CDCl}_3$ )  $\delta$  7.40 – 7.30 (m, 10H), 5.68 (s, 1H), 5.13 (s, 1H), 4.77 (d,  $J = 12.8$  Hz, 1H), 4.52 (d,  $J = 12.7$  Hz, 1H), 4.41 (d,  $J = 9.8$  Hz, 1H), 4.27 (dd,  $J = 10.5, 5.6$  Hz, 1H), 3.62 (t,  $J = 10.2$  Hz, 1H), 2.95 (brs, 1H).  $^{13}\text{C}$  NMR (75 MHz,  $\text{CDCl}_3$ )  $\delta$  140.8 ( $\text{C}_q$ ), 140.2 ( $\text{C}_q$ ), 139.4 ( $\text{C}_q$ ), 128.7 (CH), 128.6 (CH), 128.2 (CH), 128.1 (CH), 127.2 (CH), 126.0 (CH), 119.8 (CH), 83.4 (CH), 76.3 (CH), 69.7 ( $\text{CH}_2$ ), 67.0 ( $\text{CH}_2$ ), 46.6 (CH). LC-MS calcd for  $\text{C}_{19}\text{H}_{18}\text{NaO}_2$   $[\text{M}+\text{Na}]^+$  301.12, found 301.16.

### 6-methyl-3-phenyl-3,3a,4,6-tetrahydro-1H-furo[3,4-c]pyran (2g)

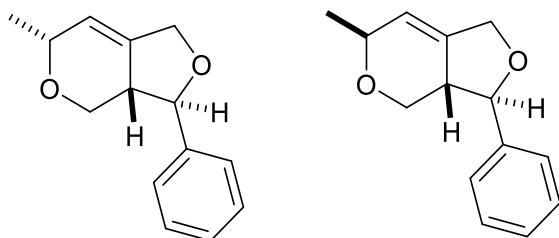

*da + db*

The procedure **GP-4** was followed using **1g** (43.3 mg, 0.20 mmol). Purification by column chromatography (eluent: gradient hexane/ethyl acetate) yielded **2g** as a pale yellow oil (31%, 13.0 mg, 0.06 mmol, *d.r.*  $\approx$  2:1).  $R_f = 0.6$  (eluent: Hexane/ethyl acetate = 8:2).  $^1\text{H}$  NMR (400 MHz,  $\text{CDCl}_3$ )  $\delta$  7.40 – 7.33 (m, 10H, *da + db*) 5.62 – 5.60 (m, 1H, *da*), 5.57 – 5.56 (m, 1H, *db*), 4.75 – 4.71 (m, 1H,

*da*), 4.70 – 4.68 (m, 1H, *db*), 4.50 – 4.47 (m, 1H, *da*), 4.46 – 4.44 (m, 1H, *db*), 4.41 – 4.38 (m, 1H, *da*), 4.35 (d,  $J = 9.9$  Hz, 1H, *da*), 4.34 (d,  $J = 9.9$  Hz, 1H, *db*), 4.25 – 2.20 (m, 1H, *db*), 4.13 (dd,  $J = 10.5, 5.7$  Hz, 1H, *da*), 3.91 (dd,  $J = 10.7, 5.9$  Hz, 1H, *db*), 3.50 – 3.47 (m, 1H, *da*), 3.45 – 3.40 (m, 1H, *db*), 2.83 – 2.76 (m, 1H, *da*), 2.72 – 2.71 (m, 1H, *db*), 1.33 – 1.29 (m, 3H, *db*), 1.31 – 1.27 (m, 3H, *da*).  $^{13}\text{C}$  NMR (101 MHz,  $\text{CDCl}_3$ )  $\delta$  140.5 ( $\text{C}_q$ , *da*), 140.4 ( $\text{C}_q$ , *db*), 139.3 ( $\text{C}_q$ , *da*), 138.9 ( $\text{C}_q$ , *db*), 128.6 (CH, *da*), 128.6 (CH, *db*), 128.1 (CH, *da,db*), 126.0 (CH, *da*), 126.0 (CH, *db*), 121.3 (CH, *da*), 121.0 (CH, *db*), 83.5 (CH, *da*), 83.3 (CH, *db*), 69.9 (CH, *da*), 69.7 (CH, *db*), 69.5 ( $\text{CH}_2$ , *da*), 67.6 ( $\text{CH}_2$ , *db*), 66.5 (*da*), 60.4 (*db*), 46.5 (CH, *da*), 46.5 (CH, *db*), 21.3 ( $\text{CH}_3$ , *da*), 20.0 ( $\text{CH}_3$ , *db*). LC-MS calcd for  $\text{C}_{14}\text{H}_{16}\text{NaO}_2$   $[\text{M}+\text{Na}]^+$  239.10 found 239.16.

### 3-phenyl-5-tosyl-1,3,3a,4,5,6-hexahydrofuro[3,4-c]pyridine (4a)

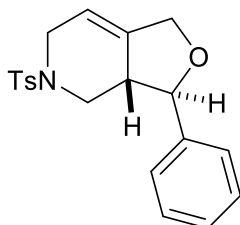

The procedure **GP-4** was followed using **3a** (49.8 mg, 0.14 mmol). Purification by column chromatography (eluent: gradient hexane/ethyl acetate) yielded **4a** as a wax (71%, 35.5 mg, 0.09 mmol, *d.r.* > 25:1).  $R_f = 0.31$  (eluent: Hexane/ethyl acetate = 7:3).  $^1\text{H}$  NMR (300 MHz,  $\text{CDCl}_3$ )  $\delta$  7.65 (d,  $J = 8.2$  Hz, 2H), 7.38–7.31 (m, 7H), 5.53 (s, 1H), 4.66 (d,  $J = 12.8$  Hz, 1H), 4.37 (d,  $J = 12.8$  Hz, 1H), 4.22 (d,  $J = 9.8$  Hz, 1H), 4.11 (d,  $J = 16.6$  Hz, 1H), 4.02 (dd,  $J = 11.1, 5.7$  Hz, 1H), 3.24 (d,  $J = 16.8$  Hz, 1H), 2.79 (brs, 1H), 2.43 (s, 3H), 2.27 (t,  $J = 10.6$  Hz, 1H).  $^{13}\text{C}$  NMR (75 MHz,  $\text{CDCl}_3$ )  $\delta$  143.7 ( $\text{C}_q$ ), 130.0 ( $\text{C}_q$ ), 139.4 ( $\text{C}_q$ ), 133.5 ( $\text{C}_q$ ), 129.8 (CH), 128.7 (CH), 128.5 (CH), 127.5 (CH), 126.2 (CH), 113.0 (CH), 84.1 (CH), 69.5 ( $\text{CH}_2$ ), 47.3 (CH), 44.5 ( $\text{CH}_2$ ), 44.3 ( $\text{CH}_2$ ), 21.6 ( $\text{CH}_3$ ). LC-MS calcd for  $\text{C}_{20}\text{H}_{21}\text{NNaO}_3\text{S}$   $[\text{M}+\text{Na}]^+$  378.11, found 378.17.

### 5-(methylsulfonyl)-3-phenyl-1,3,3a,4,5,6-hexahydrofuro[3,4-c]pyridine (**4b**)

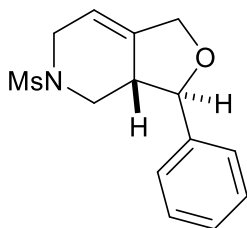

The procedure **GP-4** was followed using **3b** (55.9 mg, 0.20 mmol). Purification by column chromatography (eluent: gradient hexane/ethyl acetate) yielded **4b** as a white solid (45 %, 25.1 mg, 0.09 mmol, *d.r.* > 25:1). **M. p.** = (116 – 119)°C. **R<sub>f</sub>** = 0.27 (eluent: Hexane/ethyl acetate = 7:3). **<sup>1</sup>H NMR** (400 MHz, CDCl<sub>3</sub>) δ 7.40 – 7.30 (m, 5H), 5.62 (s, 1H), 4.72 (d, *J* = 12.9 Hz, 1H), 4.46 (d, *J* = 12.9 Hz, 1H), 4.31 (d, *J* = 9.7 Hz, 1H), 4.11 (d, *J* = 17.0 Hz, 1H), 3.98 (dd, *J* = 11.5, 5.6 Hz, 1H), 3.60 (d, *J* = 17.1 Hz, 1H), 2.80 – 2.74 (m, 4H), 2.64 (t, *J* = 10.0 Hz, 1H). **<sup>13</sup>C NMR** (101 MHz, CDCl<sub>3</sub>) δ 140.3 (C<sub>q</sub>), 139.4 (C<sub>q</sub>), 128.8 (CH), 128.4 (CH), 126.0 (CH), 113.2 (CH), 84.1 (CH), 69.6 (CH<sub>2</sub>), 47.5 (CH), 44.3 (CH<sub>2</sub>), 44.1 (CH<sub>2</sub>), 36.0 (CH<sub>3</sub>). **LC-MS** calcd for C<sub>14</sub>H<sub>17</sub>NNaO<sub>3</sub>S [M+Na]<sup>+</sup> 302.08, found 302.21.

### 3-(*o*-tolyl)-5-tosyl-1,3,3a,4,5,6-hexahydrofuro[3,4-c]pyridine (**4c**)

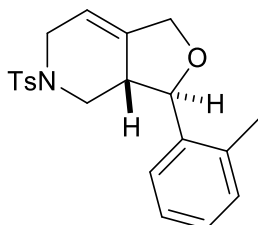

The procedure **GP-4** was followed using **3c** (51.7 mg, 0.14 mmol). Purification by column chromatography (eluent: gradient hexane/ethyl acetate) yielded **4c** as a white solid (87%, 44.3 mg, 0.12 mmol, *d.r.* > 25:1). **M. p.** = (120 – 124) °C. **R<sub>f</sub>** = 0.33 (eluent: Hexane/ethyl acetate = 7:3). **<sup>1</sup>H NMR** (400 MHz, CDCl<sub>3</sub>) δ 7.67 (d, *J* = 8.2 Hz, 2H), 7.46 – 7.44 (m, 1H), 7.34 (d, *J* = 8.1 Hz, 2H), 7.30 – 7.18 (m, 3H), 5.55 (s, 1H), 4.67 (d, *J* = 13.0 Hz, 1H), 4.49 (d, *J* = 10.0 Hz, 1H), 4.39 (d, *J* = 12.9 Hz, 1H), 4.15 (d, *J* = 16.7 Hz, 1H), 4.04 (dd, *J* = 11.1, 5.6 Hz, 1H), 3.27 (d, *J* = 16.8 Hz, 1H), 2.94 (brs, 1H), 2.46 (s, 3H), 2.33 (s, 3H), 2.29 (t, *J* = 10.7 Hz, 1H). **<sup>13</sup>C NMR** (101 MHz, CDCl<sub>3</sub>) δ 143.7 (C<sub>q</sub>), 140.2 (C<sub>q</sub>), 136.8 (C<sub>q</sub>), 135.9 (C<sub>q</sub>), 133.6 (C<sub>q</sub>), 130.7 (CH), 129.8 (CH), 128.2 (CH), 127.5 (CH), 126.5 (CH), 126.1 (CH), 112.9 (CH), 80.8 (CH), 69.3 (CH<sub>2</sub>), 46.5 (CH), 44.7 (CH<sub>2</sub>), 44.3 (CH<sub>2</sub>), 21.5 (CH<sub>3</sub>), 19.3 (CH<sub>3</sub>). **LC-MS** calcd for C<sub>21</sub>H<sub>23</sub>NNaO<sub>3</sub>S [M+Na]<sup>+</sup> 392.13, found 392.18.

### 3-(3-(benzyloxy)phenyl)-5-tosyl-1,3,3a,4,5,6-hexahydrofuro[3,4-c]pyridine (4d)

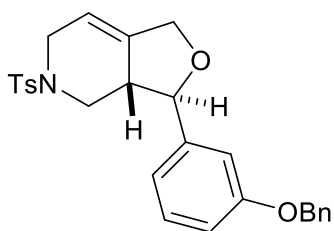

The procedure **GP-4** was followed using **3d** (64.6 mg, 0.14 mmol). Purification by column chromatography (eluent: gradient hexane/ethyl acetate) yielded **4d** as a white solid (64%, 41.5 mg, 0.09 mmol, *d.r.* > 25:1). **M. p.** = (134 – 137) °C. **R<sub>f</sub>** = 0.38 (eluent: Hexane/ethyl acetate = 7:3). **<sup>1</sup>H NMR** (400 MHz, CDCl<sub>3</sub>) δ 7.66 (d, *J* = 8.2 Hz, 2H), 7.48 – 7.28 (m, 8H), 6.99 – 6.91 (m, 3H), 5.52 (s, 1H), 5.09 (s, 2H), 4.66 (d, *J* = 12.8 Hz, 1H), 4.37 (d, *J* = 12.8 Hz, 1H), 4.19 (d, *J* = 9.8 Hz, 1H), 4.11 (d, *J* = 16.8 Hz, 1H), 4.03 (dd, *J* = 11.1, 5.7 Hz, 1H), 3.23 (d, *J* = 16.7 Hz, 1H), 2.78 (brs, 1H), 2.43 (s, 3H), 2.26 (t, *J* = 10.6 Hz, 1H). **<sup>13</sup>C NMR** (101 MHz, CDCl<sub>3</sub>) δ 159.2 (C<sub>q</sub>), 143.8 (C<sub>q</sub>), 141.2 (C<sub>q</sub>), 139.9 (C<sub>q</sub>), 136.9 (C<sub>q</sub>), 133.5 (C<sub>q</sub>), 129.8 (CH), 129.8 (CH), 128.7 (CH), 128.1 (CH), 127.7 (CH), 127.5 (CH), 118.7 (CH), 114.5 (CH), 113.0 (CH), 112.8 (CH), 83.9 (CH), 70.1 (CH<sub>2</sub>), 69.6 (CH<sub>2</sub>), 47.4 (CH), 44.6 (CH<sub>2</sub>), 44.3 (CH<sub>2</sub>), 21.6 (CH<sub>3</sub>). **LC-MS** calcd for C<sub>27</sub>H<sub>27</sub>NNaO<sub>4</sub>S [M+Na]<sup>+</sup> 484.16, found 484.19.

### 3-(4-methoxyphenyl)-5-tosyl-1,3,3a,4,5,6-hexahydrofuro[3,4-c]pyridine (4e)

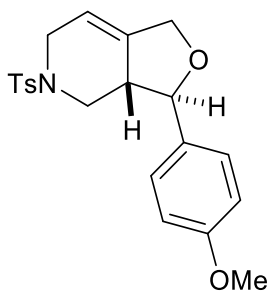

The procedure **GP-4** was followed using **3e** (53.9 mg, 0.14 mmol). Purification by column chromatography (eluent: gradient hexane/ethyl acetate) yielded **4e** as a white solid (92%, 50.1 mg, 0.13 mmol, *d.r.* > 25:1). **M. p.** = (126 – 128) °C. **R<sub>f</sub>** = 0.27 (eluent: Hexane/ethyl acetate = 7:3). **<sup>1</sup>H NMR** (400 MHz, CDCl<sub>3</sub>) δ 7.65 (d, *J* = 8.3 Hz, 2H), 7.32 (d, *J* = 8.0 Hz, 2H), 7.26 (d, *J* = 8.7 Hz, 2H), 6.91 (d, *J* = 8.7 Hz, 2H), 5.51 (s, 1H), 4.63 (d, *J* = 12.8 Hz, 1H), 4.34 (d, *J* = 12.9 Hz, 1H), 4.15 (d, *J* = 10.0 Hz, 1H), 4.12 – 4.08 (m, 1H), 3.99 (dd, *J* = 11.1, 5.7 Hz, 1H), 3.83 (s, 3H), 3.24 (d, *J* = 16.7 Hz, 1H), 2.78 (brs, 1H), 2.43 (s, 3H), 2.24 (t, (*J* = 10.0 Hz, 1H). **<sup>13</sup>C NMR** (101 MHz, CDCl<sub>3</sub>)

$\delta$  159.8 (C<sub>q</sub>), 143.7 (C<sub>q</sub>), 140.1 (C<sub>q</sub>), 133.6 (C<sub>q</sub>), 131.2 (C<sub>q</sub>), 129.8 (CH), 127.6 (CH), 127.5 (CH), 114.1 (CH), 112.9 (CH), 83.8 (CH), 69.4 (CH<sub>2</sub>), 55.4 (CH<sub>3</sub>), 47.0 (CH), 44.5 (CH<sub>2</sub>), 44.3 (CH<sub>2</sub>), 21.5 (CH<sub>3</sub>). **LC-MS** calcd for C<sub>21</sub>H<sub>23</sub>NNaO<sub>4</sub>S [M+Na]<sup>+</sup> 408.12, found 408.17.

### 3-(4-chlorophenyl)-5-tosyl-1,3,3a,4,5,6-hexahydrofuro[3,4-c]pyridine (**4f**)

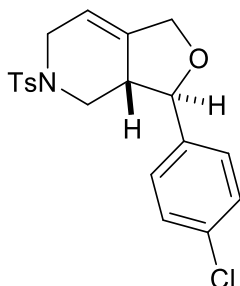

The procedure **GP-4** was followed using **3f** (54.6 mg, 0.14 mmol). Purification by column chromatography (eluent: gradient hexane/ethyl acetate) yielded **4f** as a white solid (71%, 39.0 mg, 0.01 mmol, *d.r.* > 25:1). **M. p.** = (140 – 144) °C. **R<sub>f</sub>** = 0.28 (eluent: Hexane/ethyl acetate = 7:3). **<sup>1</sup>H NMR** (400 MHz, CDCl<sub>3</sub>)  $\delta$  7.68 (d, *J* = 8.3 Hz, 2H), 7.38 (d, *J* = 8.5 Hz, 2H), 7.35 (d, *J* = 7.9 Hz, 2H), 7.29 (d, *J* = 8.4 Hz, 2H), 5.56 (s, 1H), 4.69 – 4.64 (m, 1H), 4.41 – 4.37 (m, 1H), 4.21 (d, *J* = 9.8 Hz, 1H), 4.16 – 4.11 (m, 1H), 4.02 (dd, *J* = 11.1, 5.7 Hz, 1H), 3.30 – 3.24 (m, 1H), 2.74 (brs, 1H), 2.46 (s, 3H), 2.32 – 2.27 (m, 1H). **<sup>13</sup>C NMR** (101 MHz, CDCl<sub>3</sub>)  $\delta$  143.8 (C<sub>q</sub>), 139.6 (C<sub>q</sub>), 138.1 (C<sub>q</sub>), 134.1 (C<sub>q</sub>), 133.6 (C<sub>q</sub>), 129.8 (CH), 128.92 (CH), 127.5 (2CH), 113.3 (CH), 83.3 (CH), 69.6 (CH<sub>2</sub>), 47.5 (CH), 44.4 (CH<sub>2</sub>), 44.3 (CH<sub>2</sub>), 21.6 (CH<sub>3</sub>). **LC-MS** calcd for C<sub>20</sub>H<sub>20</sub>ClNNa<sub>2</sub>O<sub>3</sub>S [M+Na]<sup>+</sup> 412.08, found 412.13.

### 3-(naphthalen-2-yl)-5-tosyl-1,3,3a,4,5,6-hexahydrofuro[3,4-c]pyridine (**4g**)

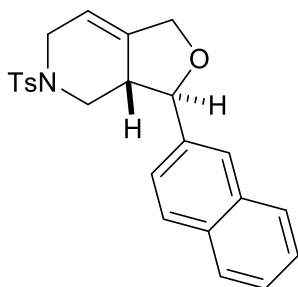

The procedure **GP-4** was followed using **3g** (56.8 mg, 0.14 mmol). Purification by column chromatography (eluent: gradient hexane/ethyl acetate) yielded **4g** as a white solid (63%, 36.5 mg,

0.09 mmol, *d.r.* > 25:1). **M.p.** = (177 – 180) °C. **R<sub>f</sub>** = 0.27 (eluent: Hexane/ethyl acetate = 7:3). **<sup>1</sup>H NMR** (400 MHz, CDCl<sub>3</sub>) δ 7.90 – 7.84 (m, 3H), 7.78 (s, 1H), 7.65 (d, *J* = 8.3 Hz, 2H), 7.52 – 7.55 (m, 3H), 7.32 (d, *J* = 8.3 Hz, 2H), 5.57 (s, 1H), 4.72 (d, *J* = 12.9 Hz, 1H), 4.45 – 4.41 (m, 1H), 4.39 (d, *J* = 9.8 Hz, 1H), 4.17 – 4.11 (m, 1H), 4.04 (dd, *J* = 11.2, 5.7 Hz, 1H), 3.32 – 3.26 (m, 1H), 2.88 (s, 1H), 2.43 (s, 3H), 2.35 (t, *J* = 10.0 Hz, 1H). **<sup>13</sup>C NMR** (101 MHz, CDCl<sub>3</sub>) δ 143.7 (C<sub>q</sub>), 140.0 (C<sub>q</sub>), 136.8 (C<sub>q</sub>), 133.7 (C<sub>q</sub>), 133.5 (C<sub>q</sub>), 133.3 (C<sub>q</sub>), 129.8 (CH), 128.7 (CH), 128.0 (CH), 127.8 (CH), 127.5 (CH), 126.3 (CH), 126.2 (CH), 125.4 (CH), 123.8 (CH), 113.1 (CH), 84.3 (CH), 69.7 (CH<sub>2</sub>), 47.3 (CH), 44.6 (CH<sub>2</sub>), 44.3 (CH<sub>2</sub>), 21.6 (CH<sub>3</sub>). **LC-MS** calcd for C<sub>24</sub>H<sub>23</sub>NNaO<sub>3</sub>S [M+Na]<sup>+</sup> 428.13, found 428.16.

### 3-(furan-2-yl)-5-tosyl-1,3,3a,4,5,6-hexahydrofuro[3,4-c]pyridine (**4h**)

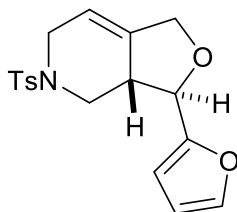

The procedure **GP-4** was followed using **3h** (48.4 mg, 0.14 mmol). Purification by column chromatography (eluent: gradient hexane/ethyl acetate) yielded **4h** as a white solid (68%, 34.5 mg, 0.10 mmol, *d.r.* > 25:1). **M.p.** = (149 – 152) °C. **R<sub>f</sub>** = 0.27 (eluent: Hexane/ethyl acetate = 7:3). **<sup>1</sup>H NMR** (400 MHz, CDCl<sub>3</sub>) δ 7.66 (d, *J* = 8.3 Hz, 2H), 7.45 – 7.44 (m, 2H), 7.32 (d, *J* = 8.0 Hz, 2H), 6.44 (s, 1H), 5.52 (s, 1H), 4.56 (d, *J* = 12.9 Hz, 1H), 4.30 (d, *J* = 12.9 Hz, 1H), 4.19 (d, *J* = 10.0 Hz, 1H), 4.12 (d, *J* = 16.7 Hz, 1H), 4.03 (dd, *J* = 11.2, 5.7 Hz, 1H), 3.23 (d, *J* = 16.8 Hz, 1H), 2.82 (brs, 1H), 2.43 (s, 3H), 2.18 (t, *J* = 10.0 Hz, 1H). **<sup>13</sup>C NMR** (101 MHz, CDCl<sub>3</sub>) δ 143.9 (CH), 143.8 (C<sub>q</sub>), 140.2 (CH), 139.7 (C<sub>q</sub>), 133.5 (C<sub>q</sub>), 129.8 (CH), 127.5 (CH), 123.9 (C<sub>q</sub>), 113.1 (CH), 108.5 (CH), 76.3 (CH), 69.2 (CH<sub>2</sub>), 45.7 (CH), 44.6 (CH<sub>2</sub>), 44.3 (CH<sub>2</sub>), 21.6 (CH<sub>3</sub>). **LC-MS** calcd for C<sub>18</sub>H<sub>19</sub>NNaO<sub>4</sub>S [M+Na]<sup>+</sup> 368.09, found 368.13.



### 3-(thiophen-2-yl)-5-tosyl-1,3,3a,4,5,6-hexahydrofuro[3,4-c]pyridine (4i)

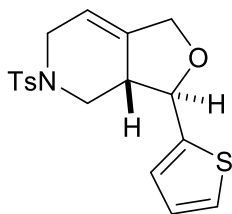

The procedure **GP-4** was followed using **3i** (50.6 mg, 0.14 mmol). Purification by column chromatography (eluent: gradient hexane/ethyl acetate) yielded **4i** as a pale yellow solid (68%, 36.1 mg, 0.10 mmol, *d.r.* > 25:1). **M. p.** = (132 – 135) °C. **R<sub>f</sub>** = 0.24 (eluent: Hexane/ethyl acetate = 7:3). **<sup>1</sup>H NMR** (400 MHz, CDCl<sub>3</sub>) δ 7.66 (d, *J* = 8.3 Hz, 2H), 7.33 – 7.31 (m, 3H), 7.03 – 6.99 (m, 2H), 5.52 (s, 1H), 4.61 (d, *J* = 12.9 Hz, 1H), 4.48 (d, *J* = 9.8 Hz, 1H), 4.33 (d, *J* = 12.9 Hz, 1H), 4.15 – 4.07 (m, 2H), 3.24 (d, *J* = 16.9 Hz, 1H), 2.90 (s, 1H), 2.43 (s, 3H), 2.25 (t, *J* = 10.0 Hz, 1H). **<sup>13</sup>C NMR** (101 MHz, CDCl<sub>3</sub>) δ 143.80 (C<sub>q</sub>), 142.38 (C<sub>q</sub>), 139.3 (C<sub>q</sub>), 133.6 (C<sub>q</sub>), 129.8 (CH), 127.5 (CH), 126.8 (CH), 125.8 (CH), 125.2 (CH), 113.4 (CH), 79.5 (CH), 69.4 (CH<sub>2</sub>), 47.4 (CH), 44.5 (CH<sub>2</sub>), 44.3 (CH<sub>2</sub>), 21.6 (CH<sub>3</sub>). **LC-MS** calcd for C<sub>18</sub>H<sub>19</sub>NNaO<sub>3</sub>S<sub>2</sub> [M+Na]<sup>+</sup> 384.07, found 384.11.

## Scope limitations

List of unsuccessful substrates

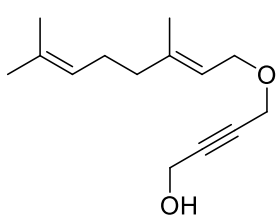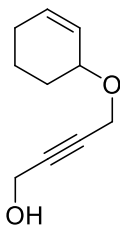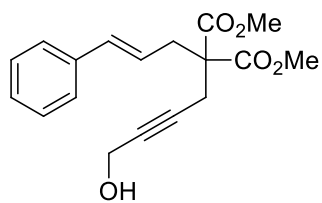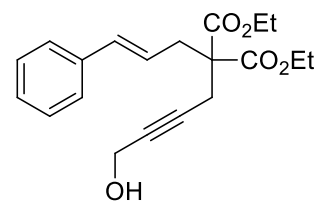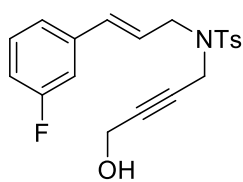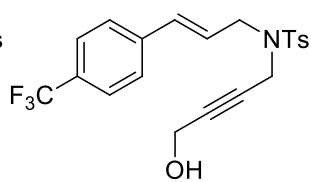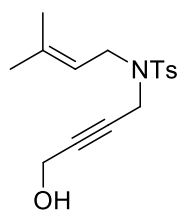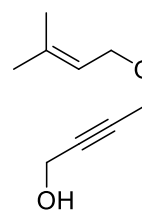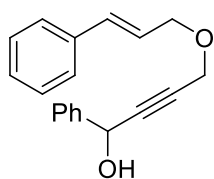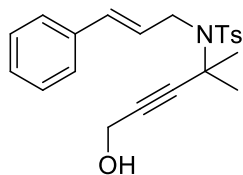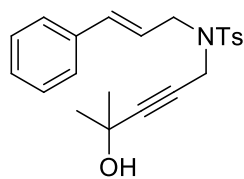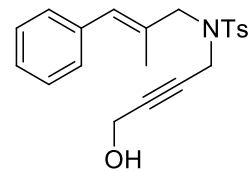

## Copies of NMR spectra

—30.8

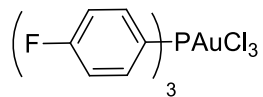

Gold catalyst **B** (162 MHz, CDCl<sub>3</sub>)

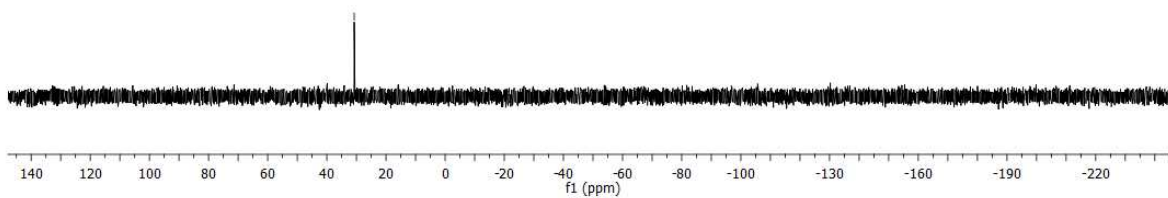

—29.3

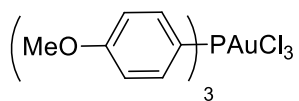

Gold catalyst **C** (162 MHz, CDCl<sub>3</sub>)

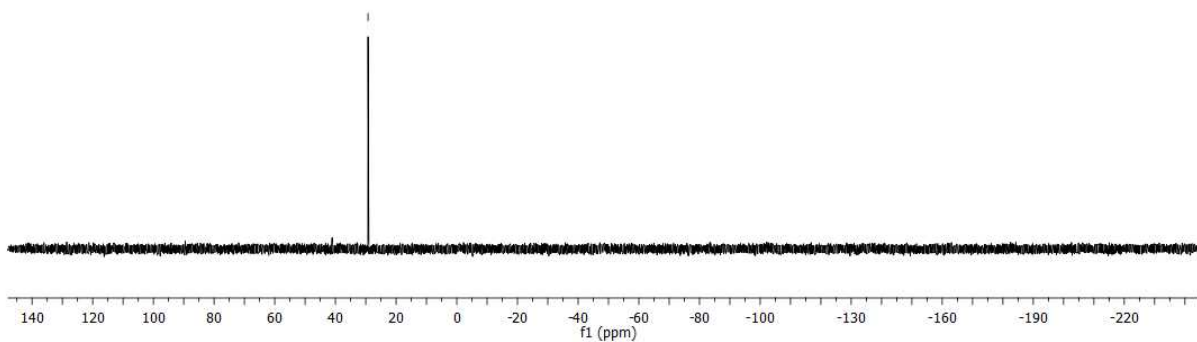

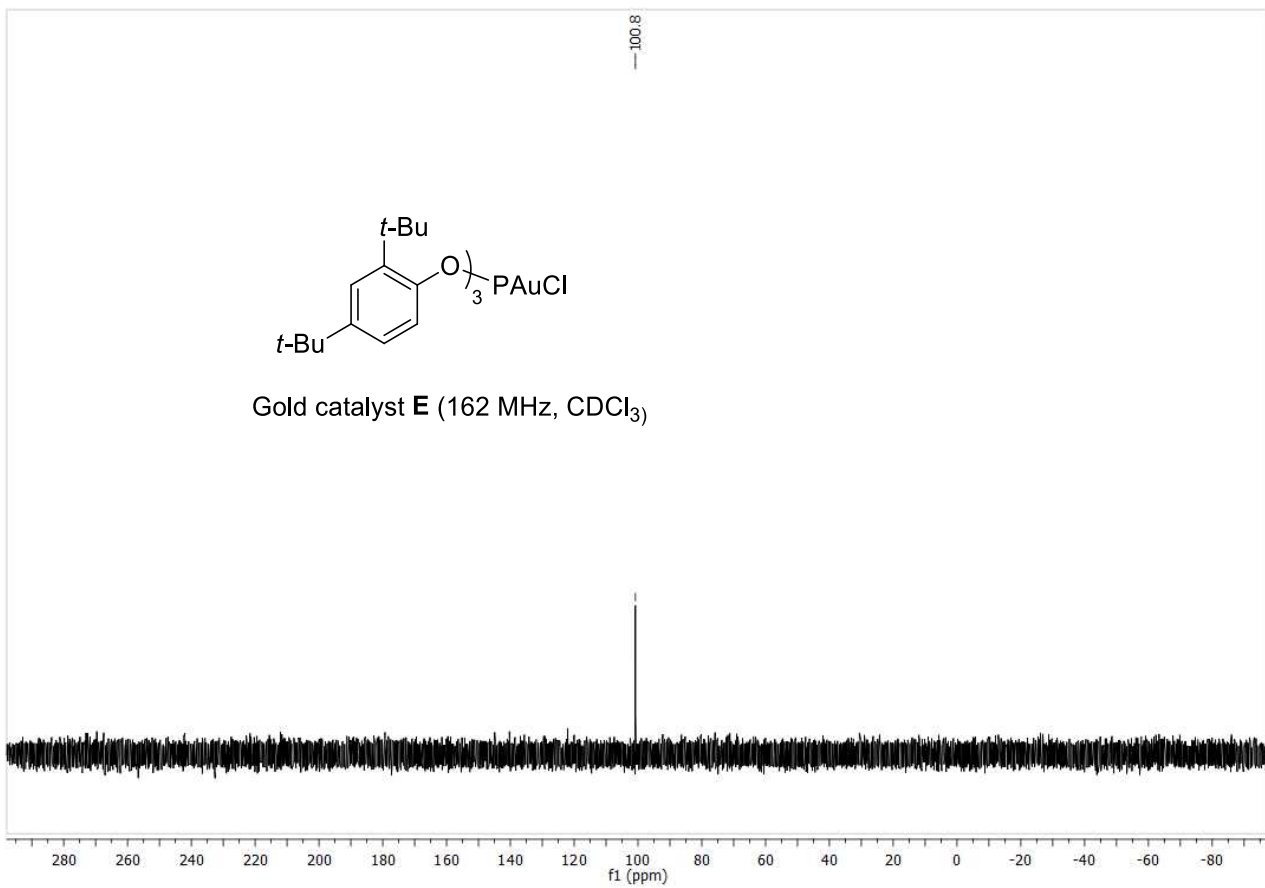

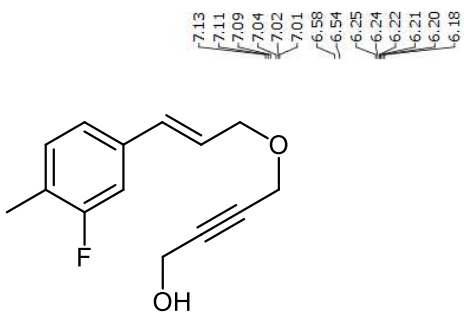

**1b** (400 MHz, CDCl<sub>3</sub>)

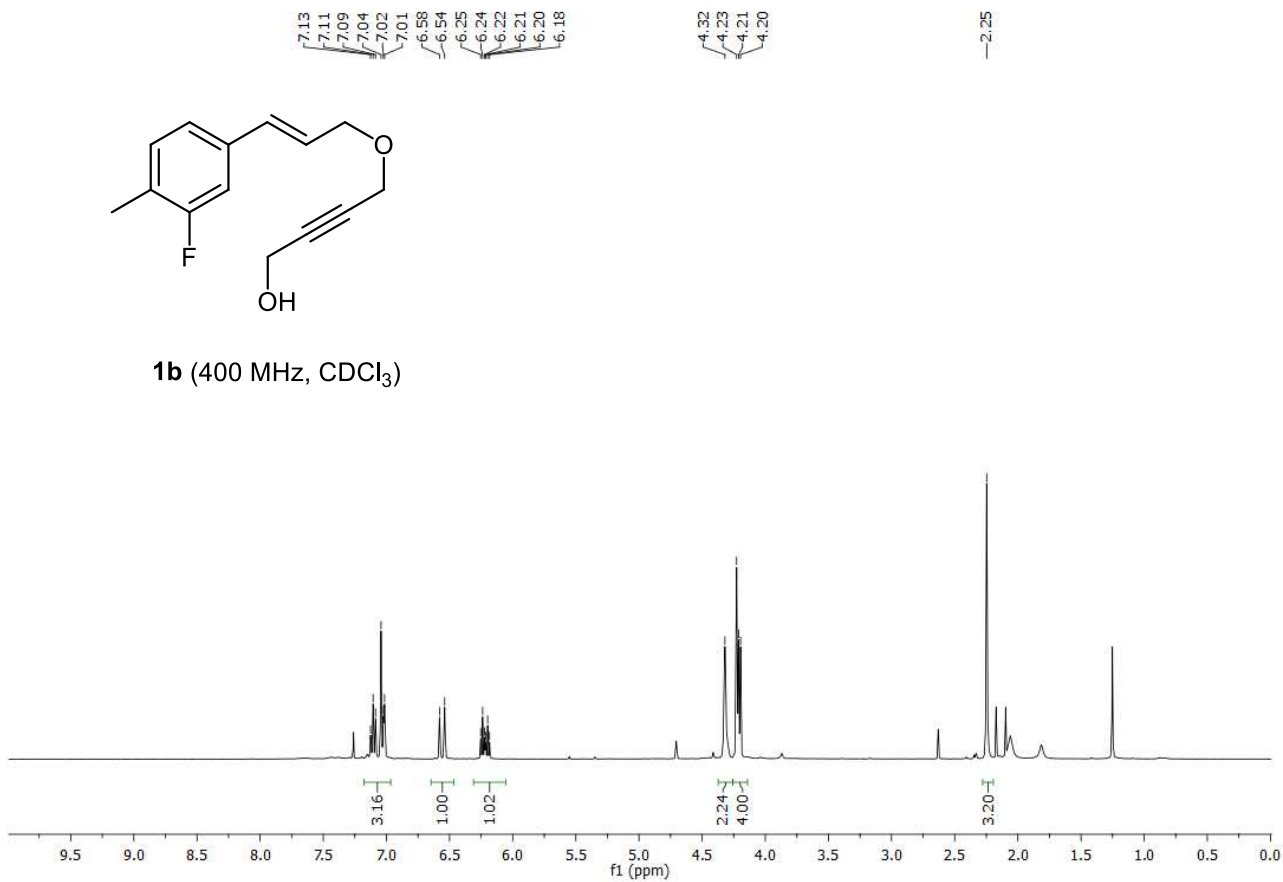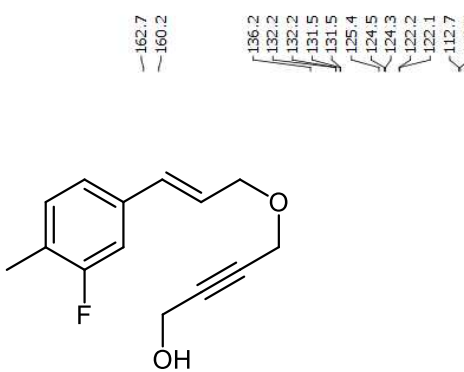

**1b** (101 MHz, CDCl<sub>3</sub>)

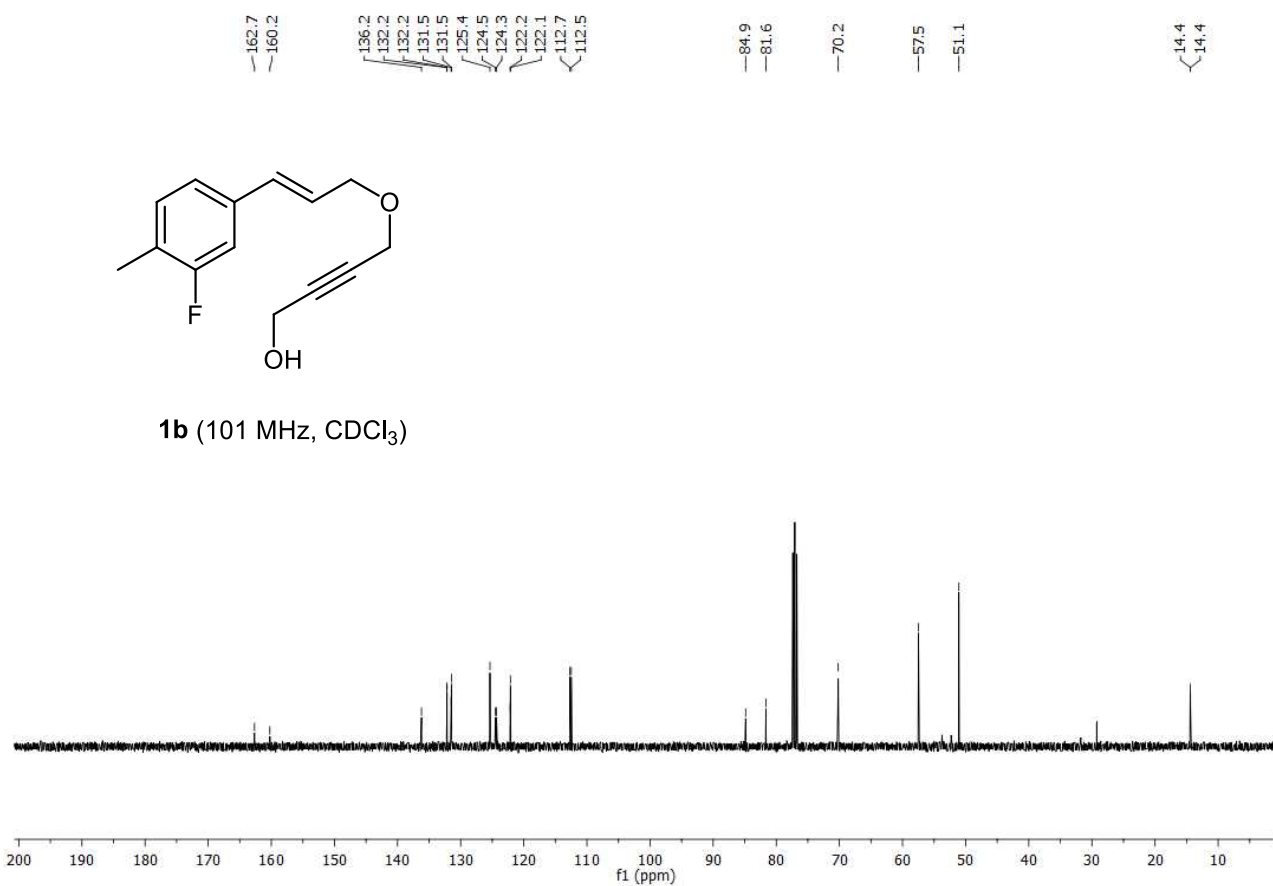

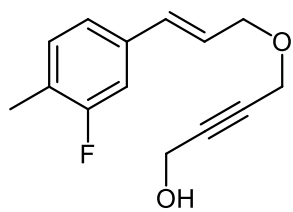

**1b** (565 MHz, CDCl<sub>3</sub>)

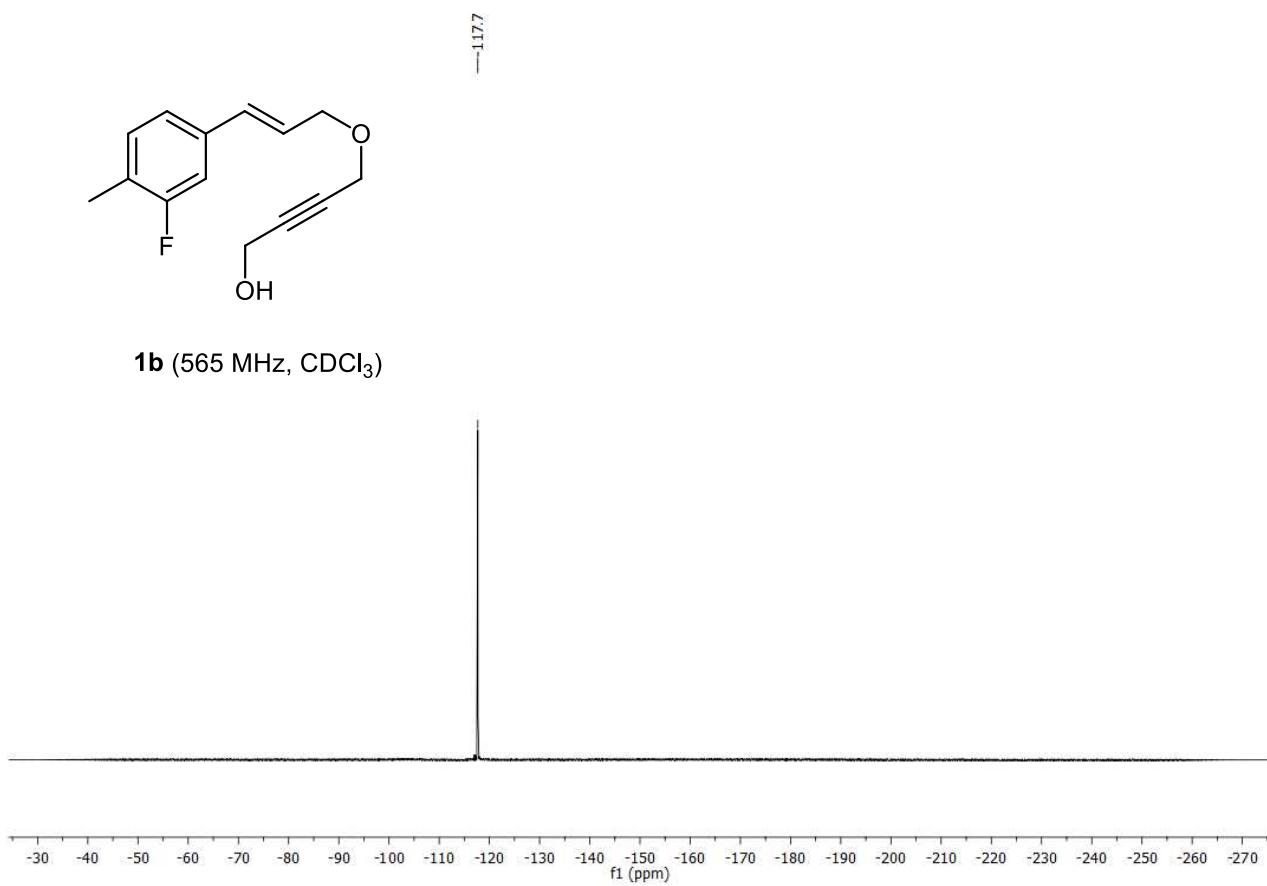

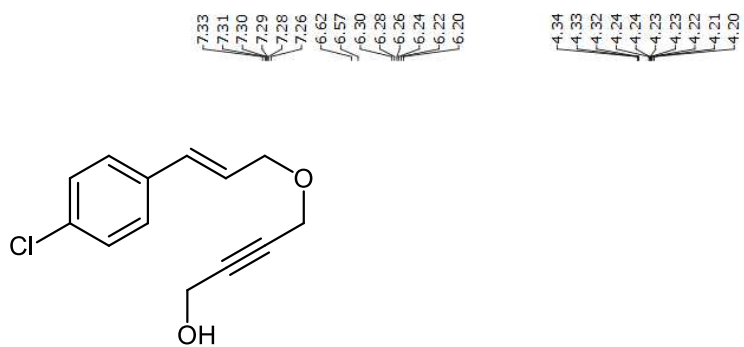

**1c** (300 MHz, CDCl<sub>3</sub>)

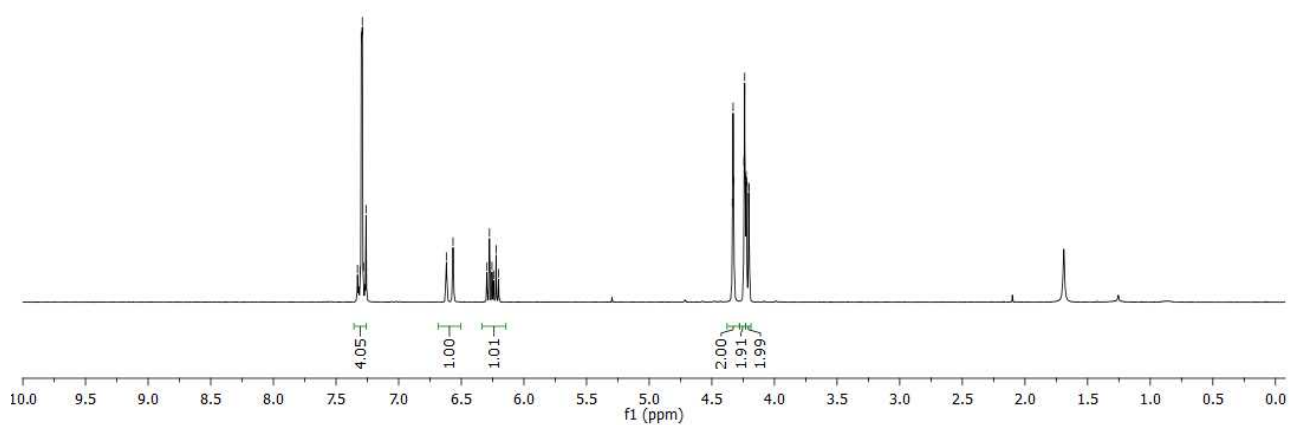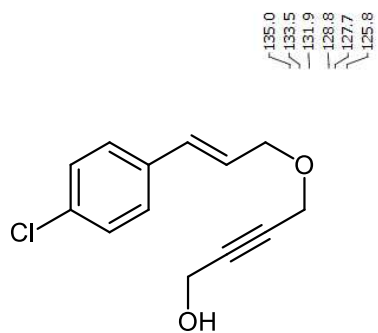

**1c** (75 MHz, CDCl<sub>3</sub>)

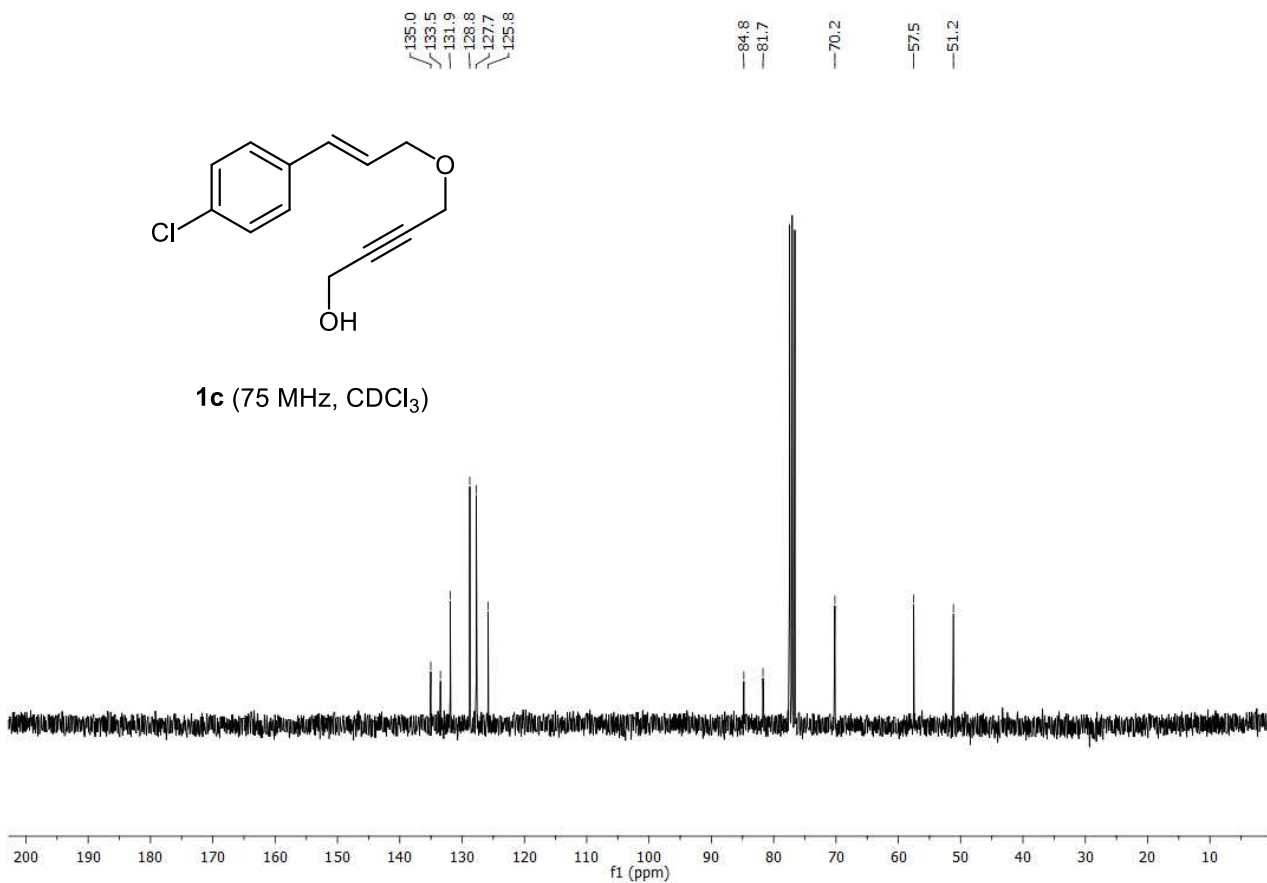

8.13  
8.11  
7.86  
7.85  
7.84  
7.80  
7.78  
7.62  
7.60  
7.54  
7.53  
7.52  
7.51  
7.51  
7.49  
7.49  
7.47  
7.45  
7.39  
6.35  
6.33  
6.32  
6.31  
6.29  
6.28

4.35  
4.33  
4.31  
4.31

2.10

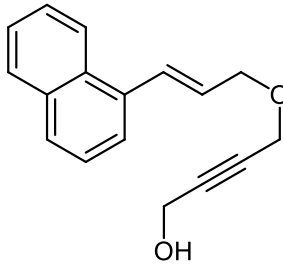

**1d** (400 MHz, CDCl<sub>3</sub>)

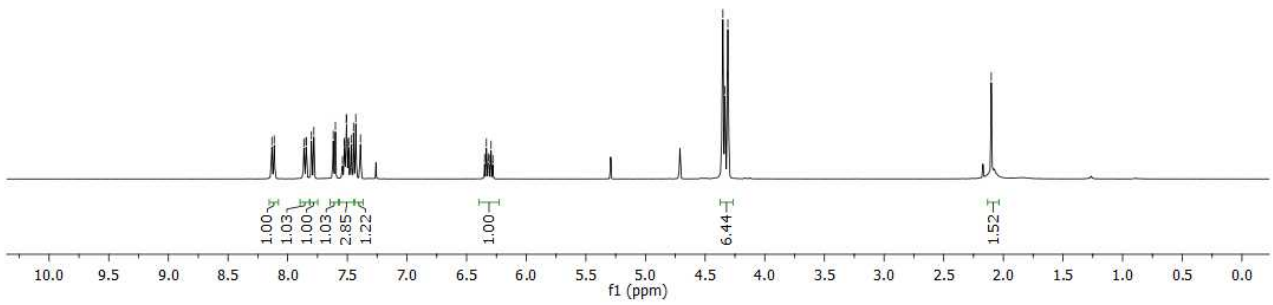

134.3  
133.6  
131.1  
130.5  
128.6  
128.3  
128.2  
126.1  
125.8  
125.6  
124.0  
123.8

85.0  
81.6  
70.6  
57.6  
51.0

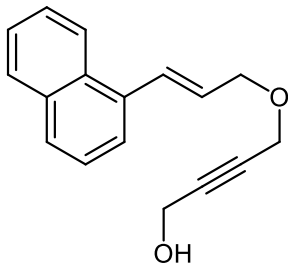

**1d** (101 MHz, CDCl<sub>3</sub>)

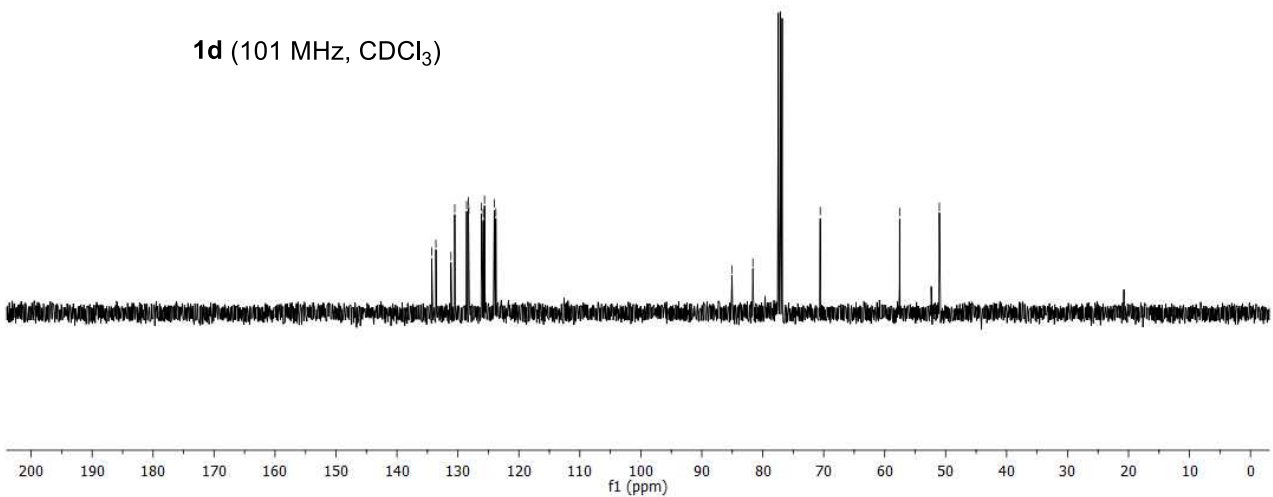



7.82 7.80 7.79 7.78 7.74 7.62 7.62 7.59 7.49 7.47 7.47 7.45 7.44 7.42 6.84 6.78 6.45 6.43 6.41 6.40 6.38 6.36 4.36 4.34 4.30 4.30 4.28 4.28 4.27

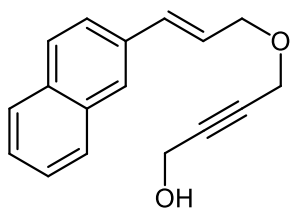

**1e** (300 MHz, CDCl<sub>3</sub>)

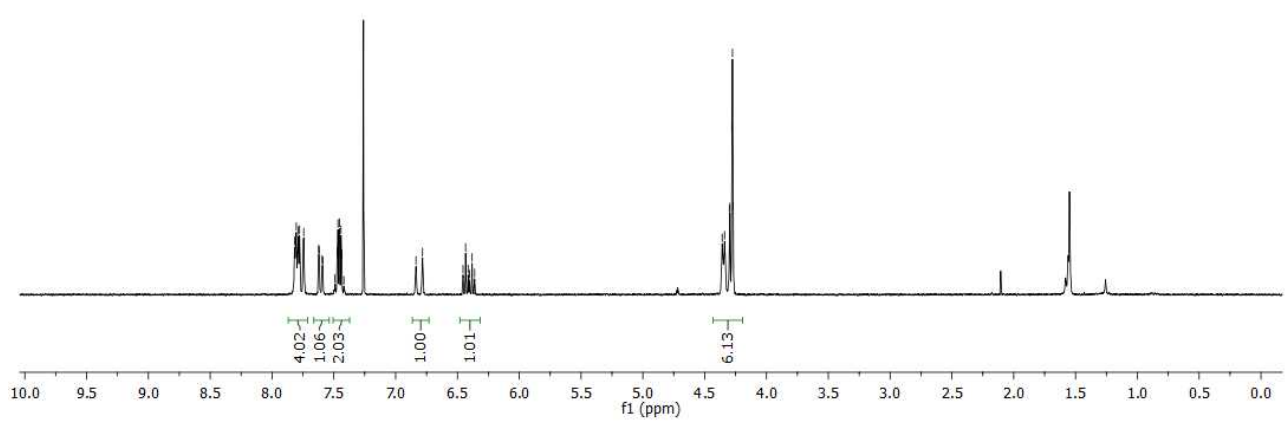

134.0 133.6 133.5 133.1 128.3 128.0 127.7 126.7 126.3 126.0 125.5 123.5 -84.8 -81.8 -70.5 -57.5 -51.2

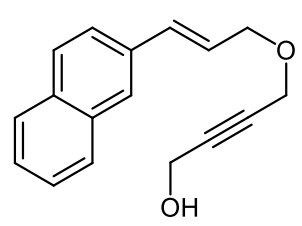

**1e** (101 MHz, CDCl<sub>3</sub>)

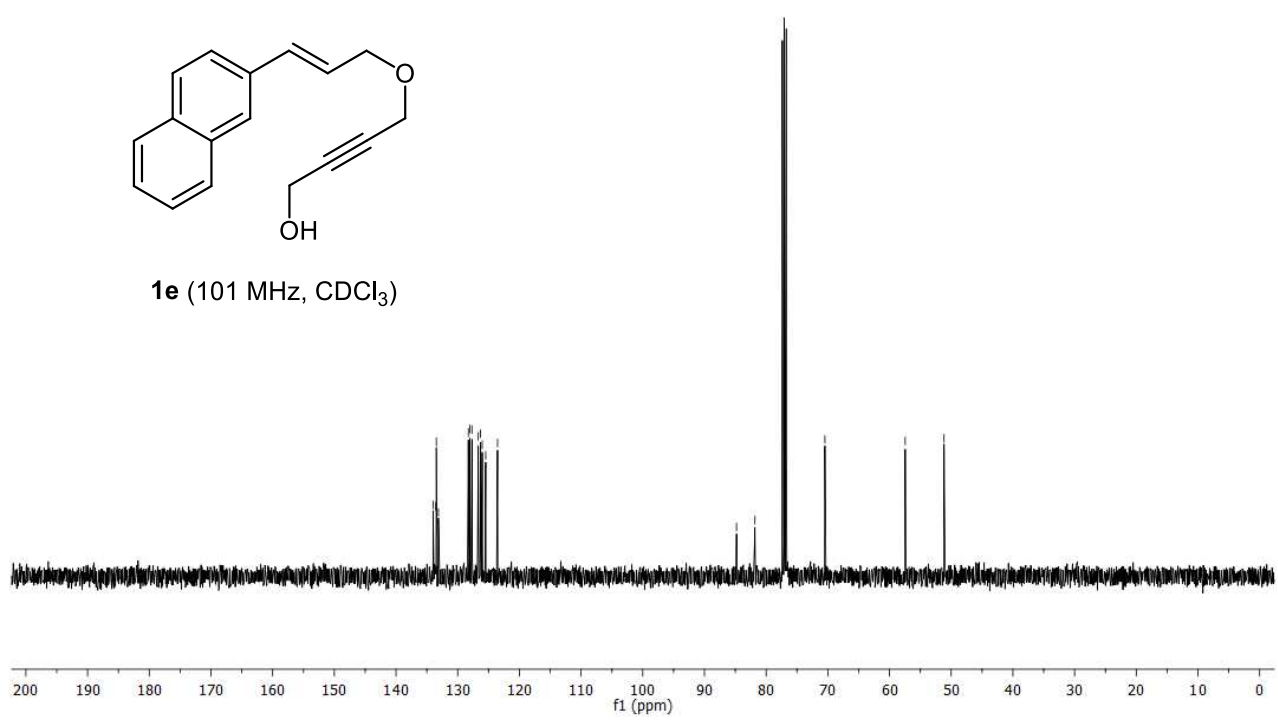

7.57  
7.55  
7.54  
7.44  
7.43  
7.42  
7.41  
7.41  
7.40  
7.40  
7.39  
7.38  
7.37  
7.37  
7.37  
7.35  
7.32  
7.32  
6.78  
6.65  
6.39  
6.37  
6.35  
6.34  
6.32  
6.30  
-5.32  
4.39  
4.38  
4.37  
4.35  
4.35  
4.34  
4.33  
4.31  
4.31  
4.29  
4.29  
-1.96

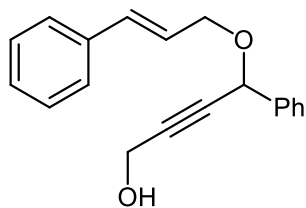

**1f** (300 MHz, CDCl<sub>3</sub>)

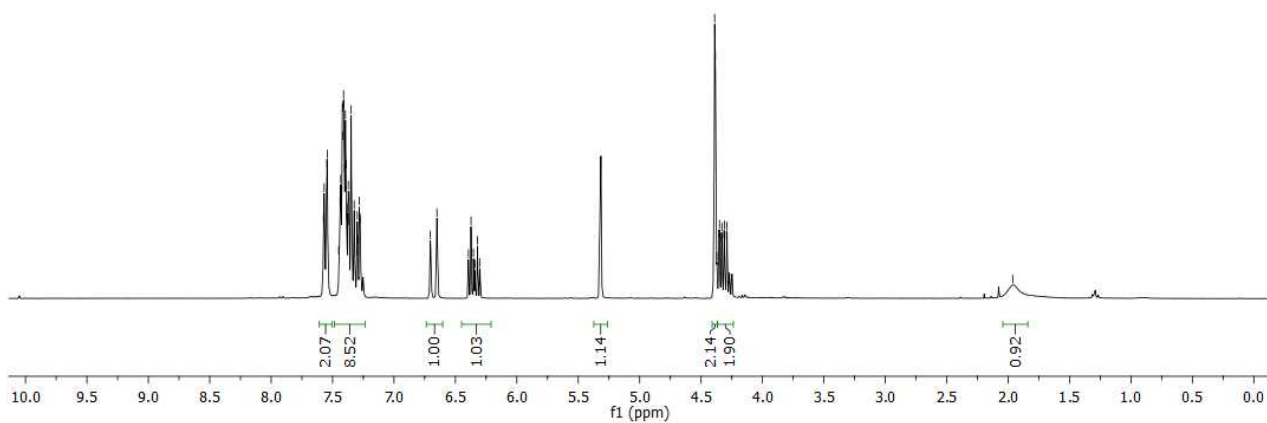

138.4  
136.6  
133.4  
128.7  
128.6  
128.6  
127.9  
127.5  
126.6  
125.4  
86.1  
83.5  
70.7  
69.0  
51.0

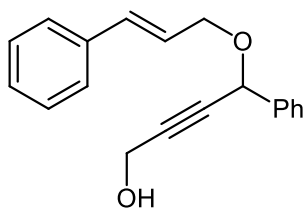

**1f** (101 MHz, CDCl<sub>3</sub>)

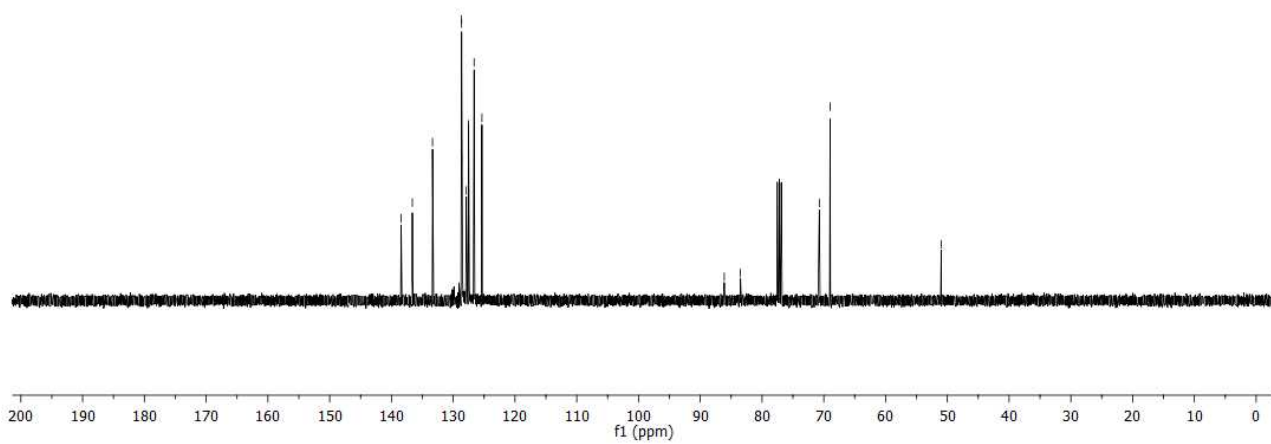

7.43 7.43 7.42 7.40 7.40 7.37 7.36 7.35 7.34 7.33 7.32 7.31 7.29 7.29 7.28 7.26 6.69 6.64 6.36 6.35 6.34 6.32 6.31 6.29 6.27 4.45 4.43 4.43 4.41 4.41 4.39 4.39 4.35 4.35 4.34 4.34 4.32 4.31 4.19 4.19 4.17 4.17 4.15 4.15 4.13 4.13 1.51 1.49

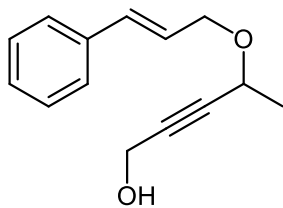

**1g** (300 MHz, CDCl<sub>3</sub>)

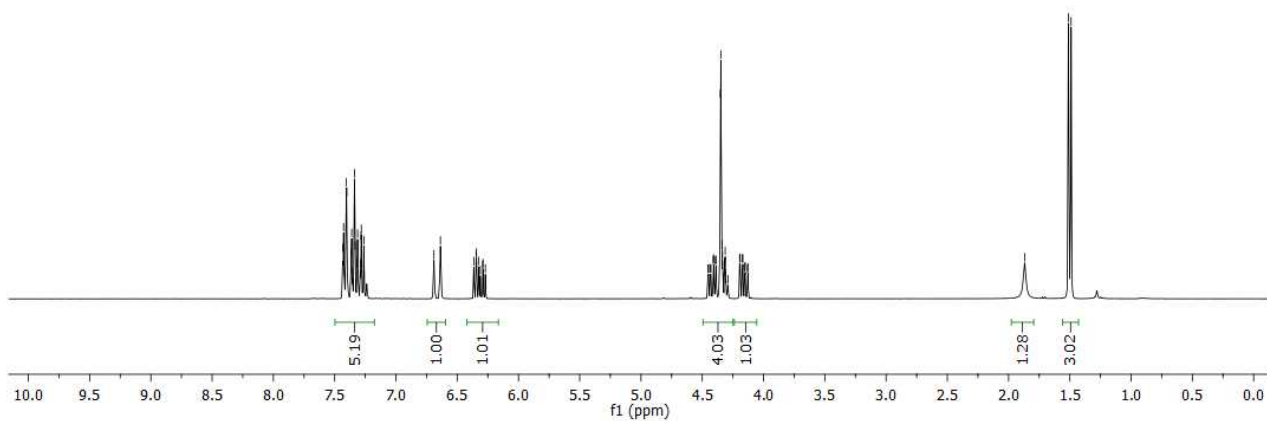

136.6 133.0 128.6 127.8 126.5 125.5 85.6 83.3 69.3 64.5 51.1 22.1

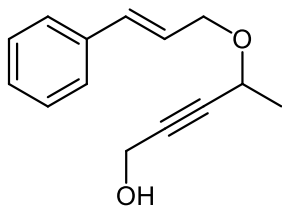

**1g** (75 MHz, CDCl<sub>3</sub>)

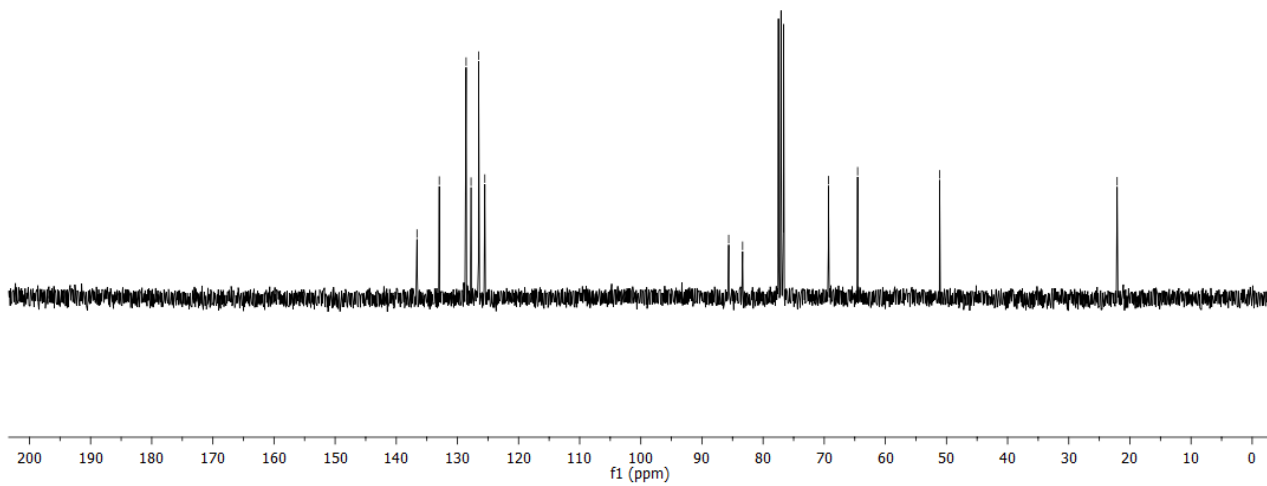

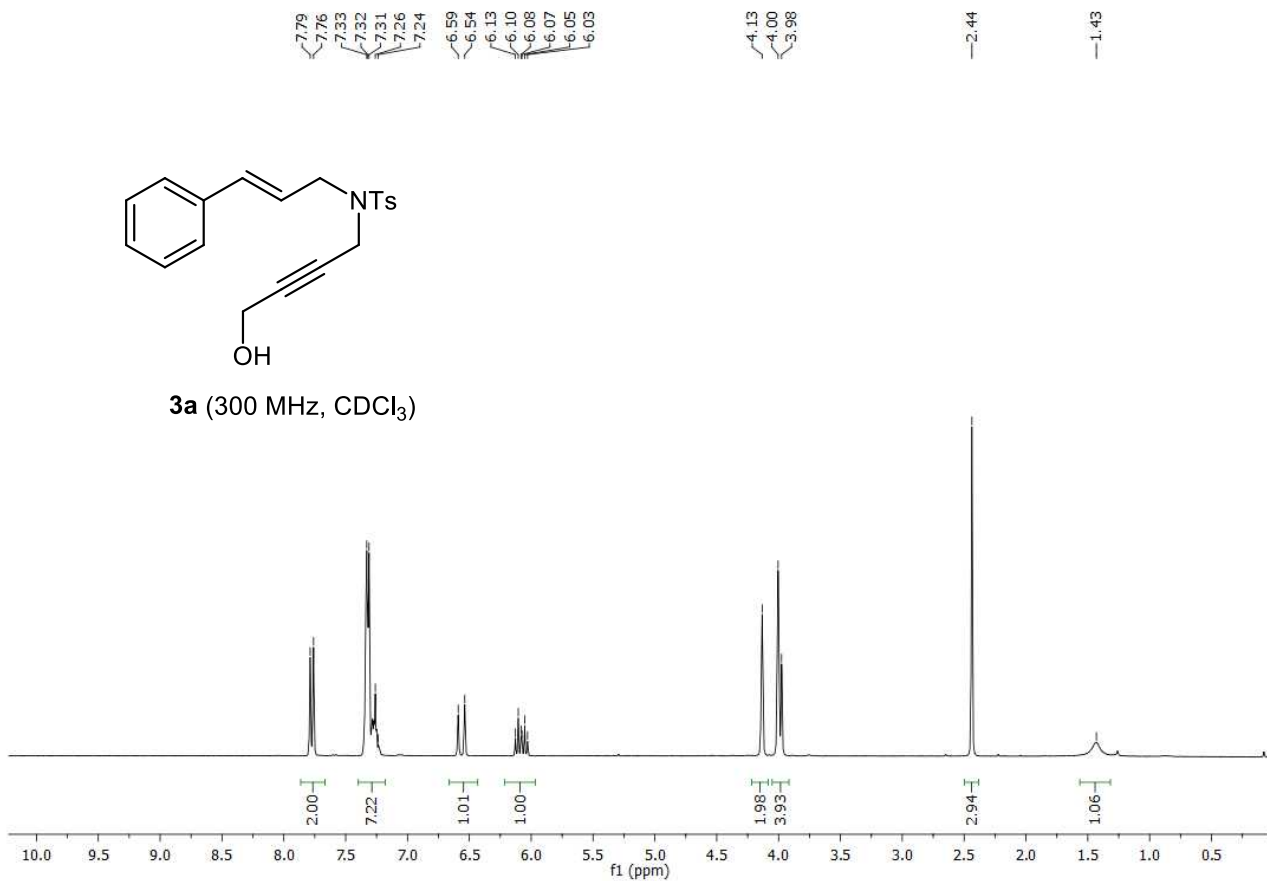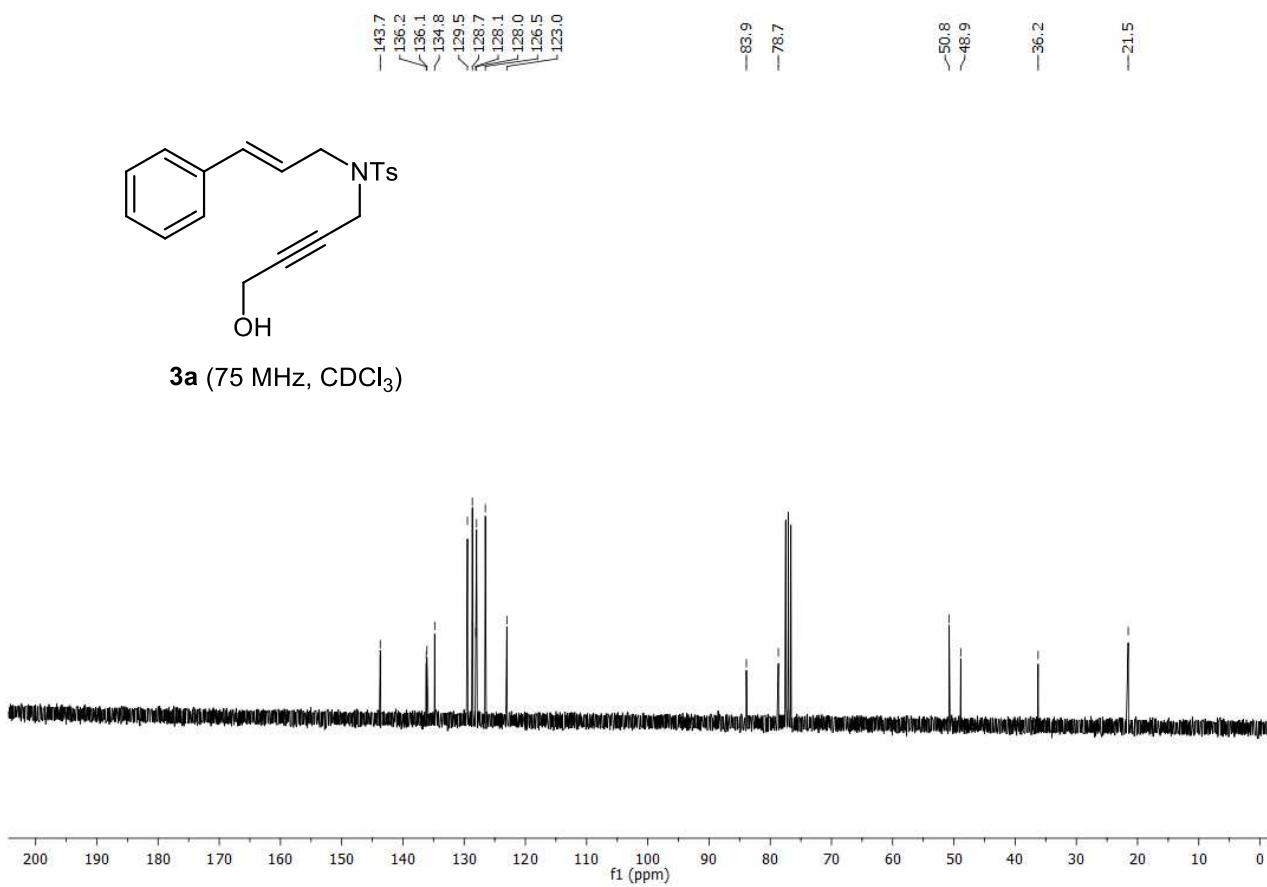

7.41, 7.38, 7.36, 7.33, 7.30, 7.29, 7.27, 7.26, 6.68, 6.63, 6.22, 6.20, 6.17, 6.14, 6.12, 4.33, 4.32, 4.32, 4.14, 4.14, 4.13, 4.06, 4.06, 4.04, 4.04, -2.99

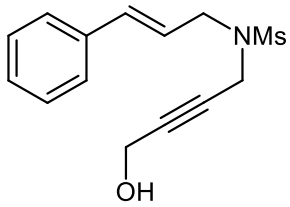

**3b** (300 MHz, CDCl<sub>3</sub>)

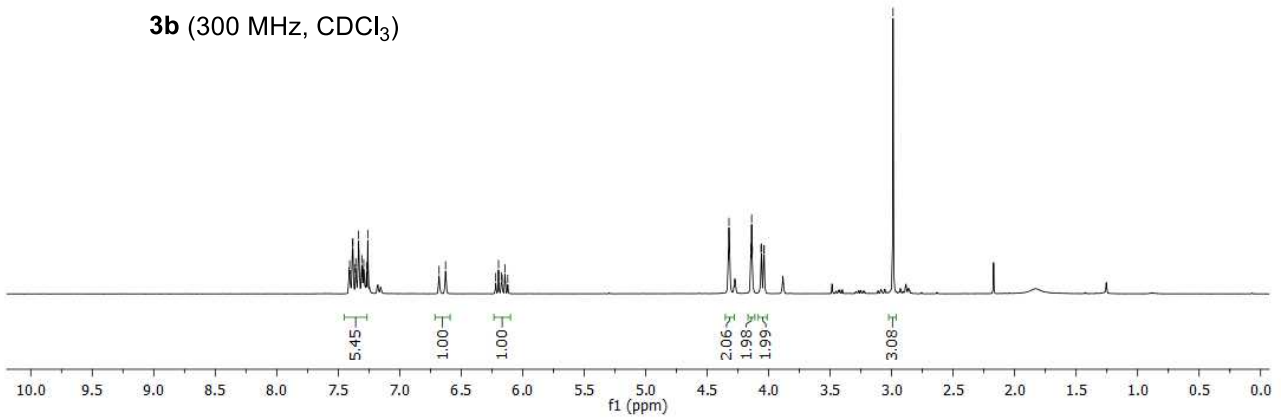

136.0, 135.0, 128.7, 128.2, 126.6, 122.9, 84.4, 79.3, 77.5, 77.0, 76.6, 51.0, 48.9, 38.7, 36.1

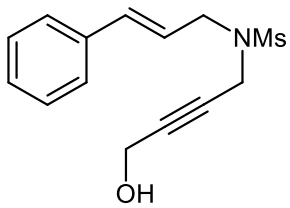

**3b** (75 MHz, CDCl<sub>3</sub>)

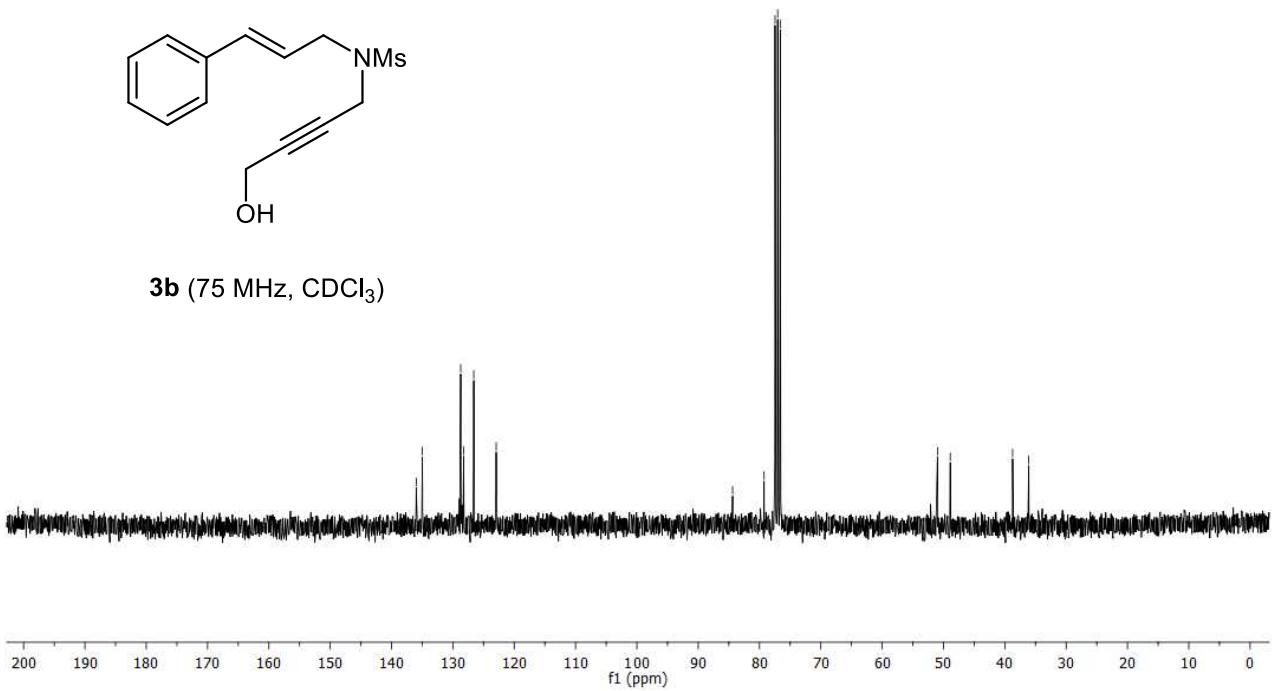

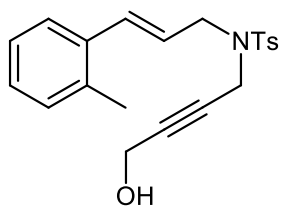

**3c** (400 MHz, CDCl<sub>3</sub>)

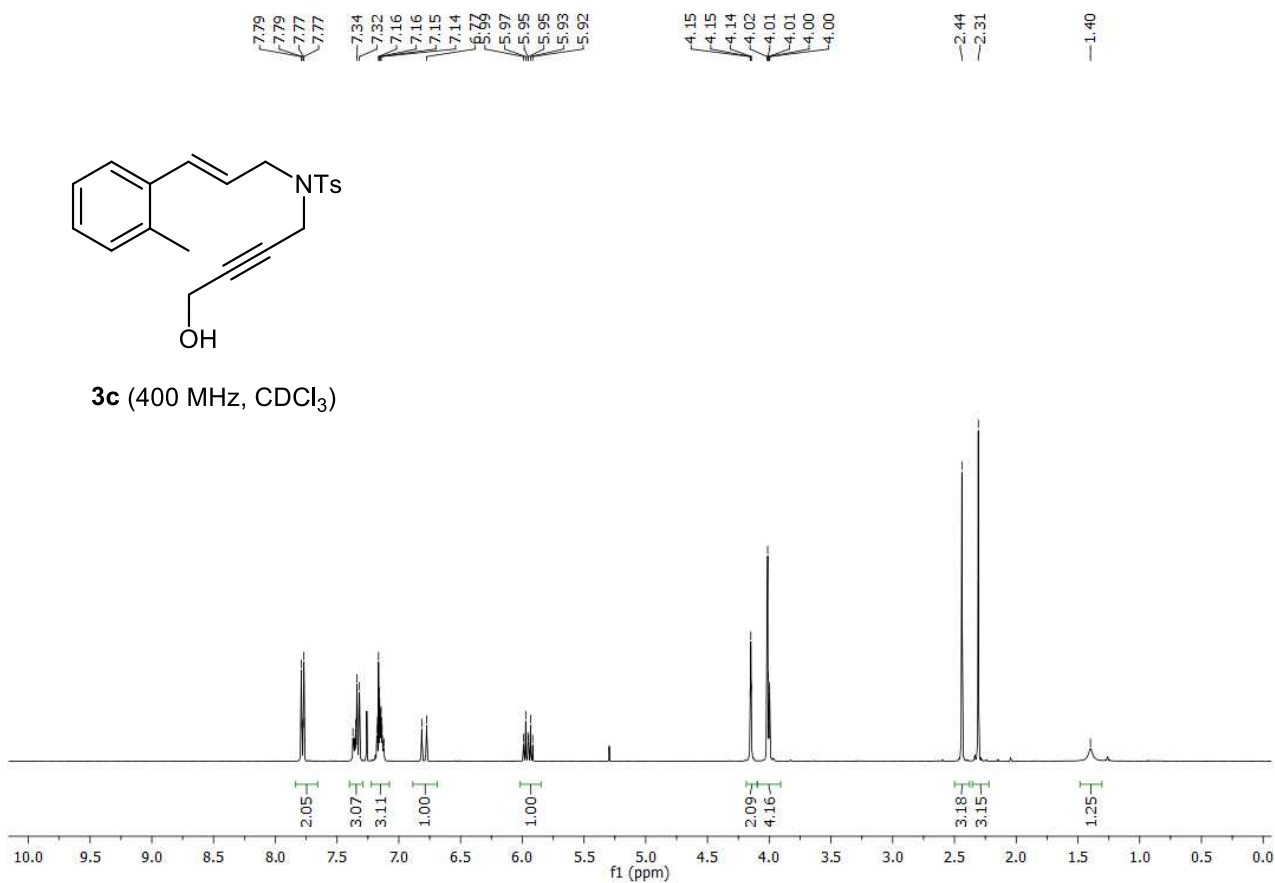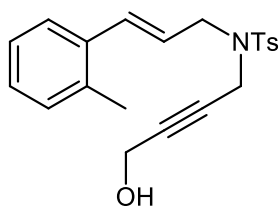

**3c** (101 MHz, CDCl<sub>3</sub>)

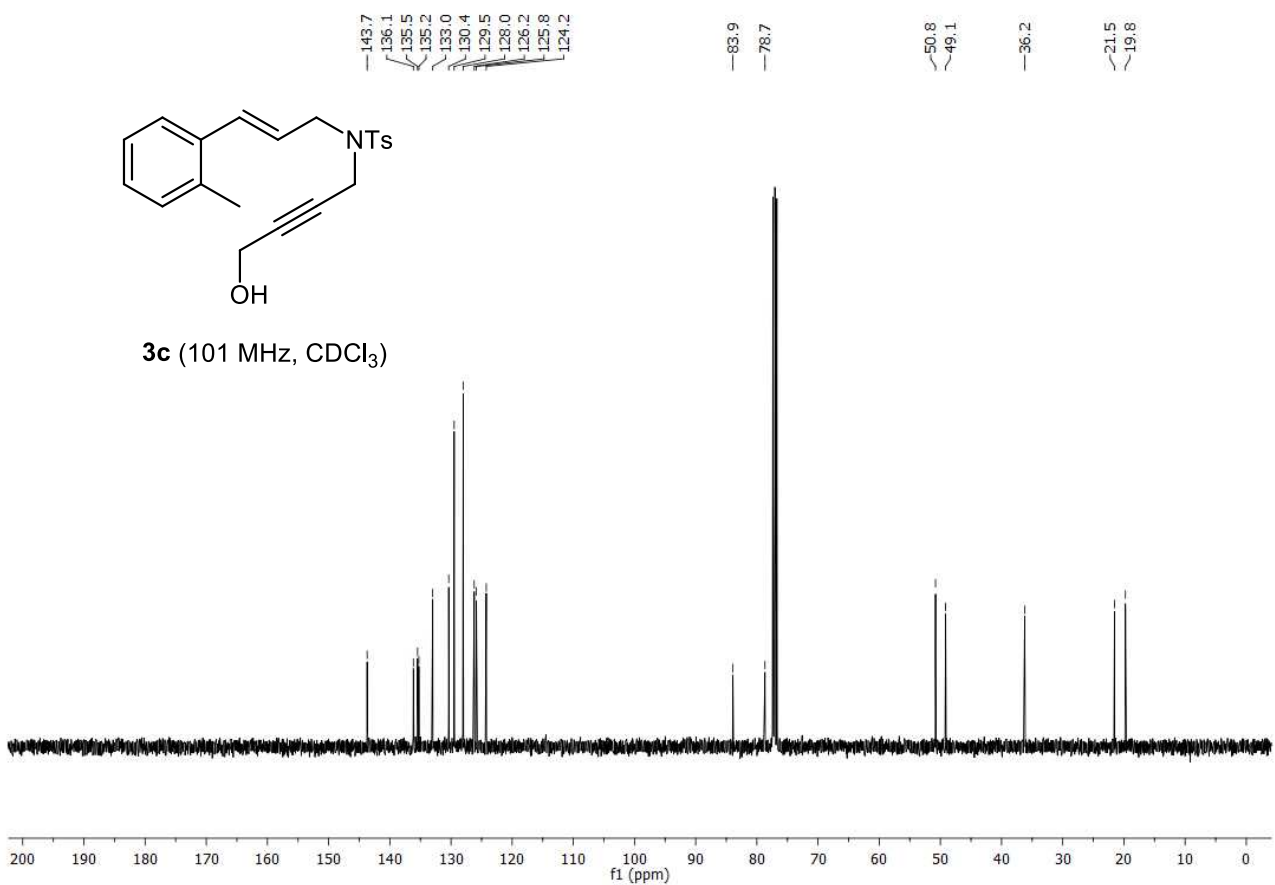

7.78  
7.76  
7.45  
7.43  
7.41  
7.39  
7.39  
7.37  
7.35  
7.34  
7.32  
7.26  
7.25  
7.23  
7.21  
6.96  
6.96  
6.93  
6.90  
6.89  
6.88  
6.87  
6.55  
6.51  
6.11  
6.09  
6.07  
6.07  
6.05  
6.03  
— 5.06  
4.13  
4.00  
3.99  
3.97  
— 2.43

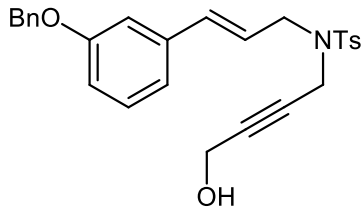

**3d** (400 MHz, CDCl<sub>3</sub>)

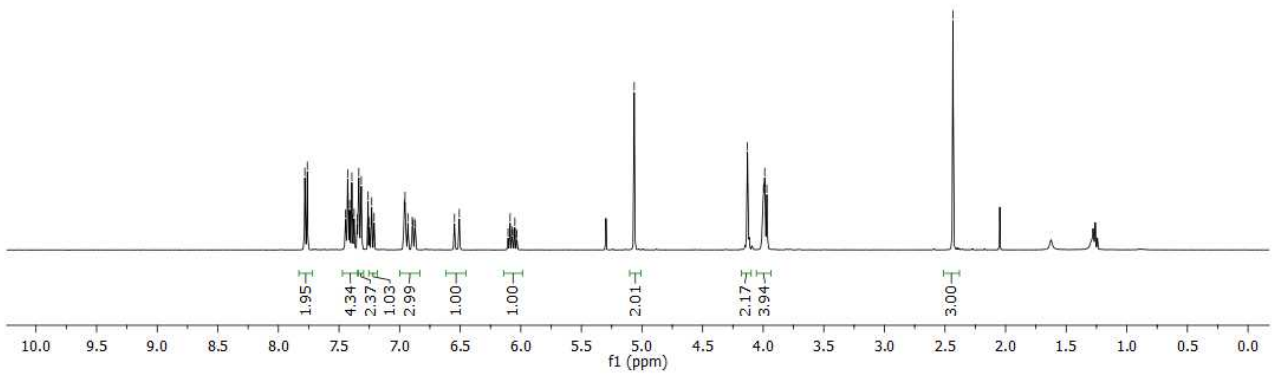

— 159.1  
143.7  
137.6  
136.9  
136.2  
134.6  
129.7  
129.5  
128.6  
128.1  
128.0  
127.5  
123.4  
119.5  
114.6  
112.9  
— 83.9  
— 78.7  
— 70.0  
— 50.8  
— 48.8  
— 36.3  
— 21.6

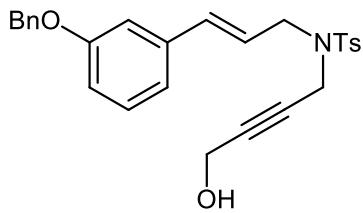

**3d** (101 MHz, CDCl<sub>3</sub>)

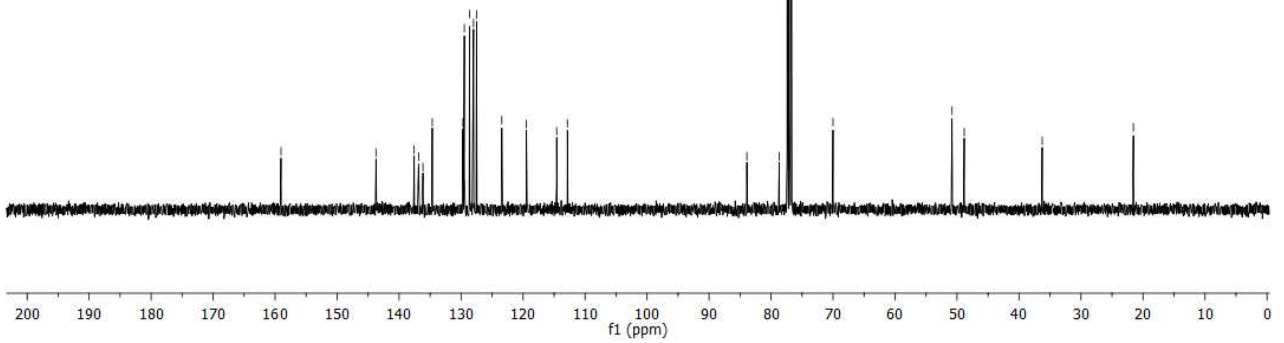

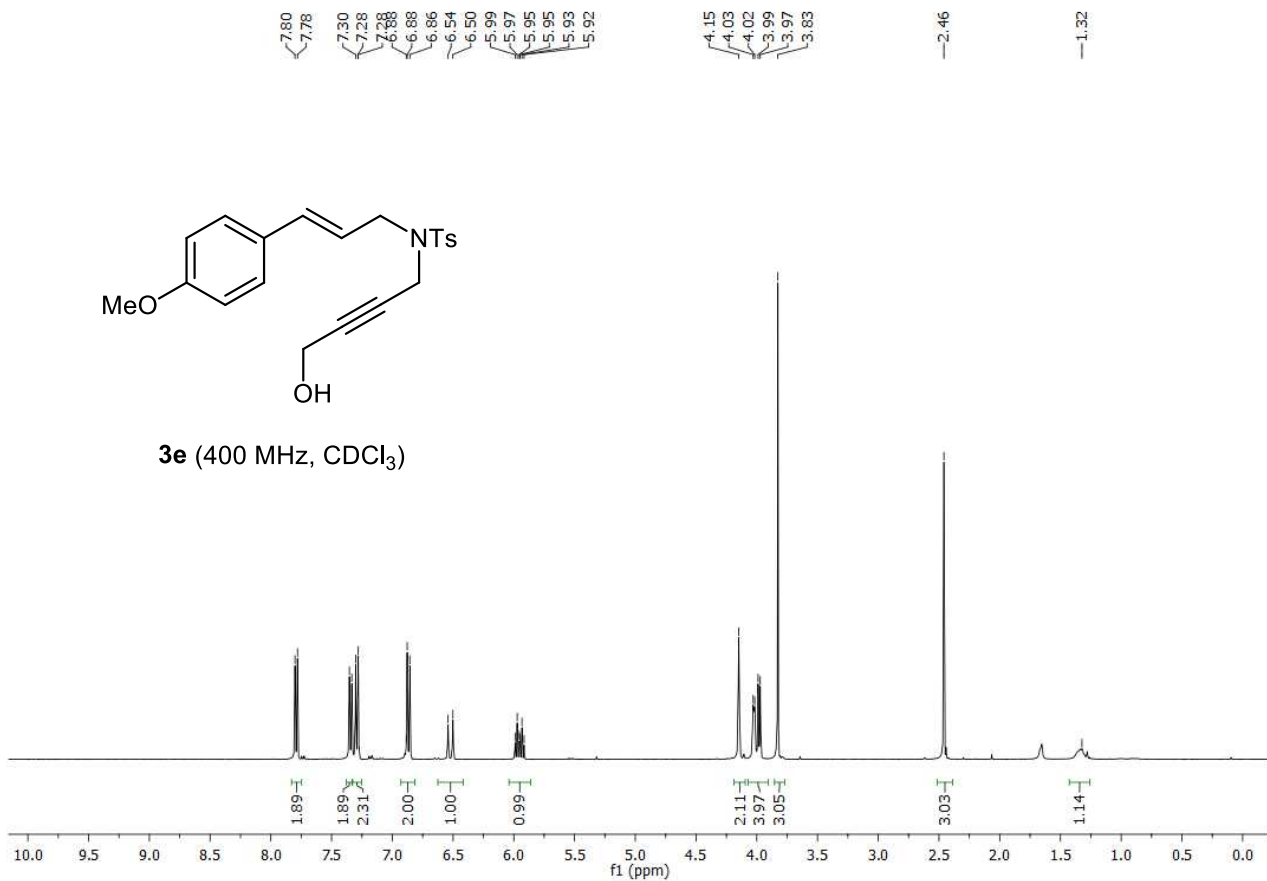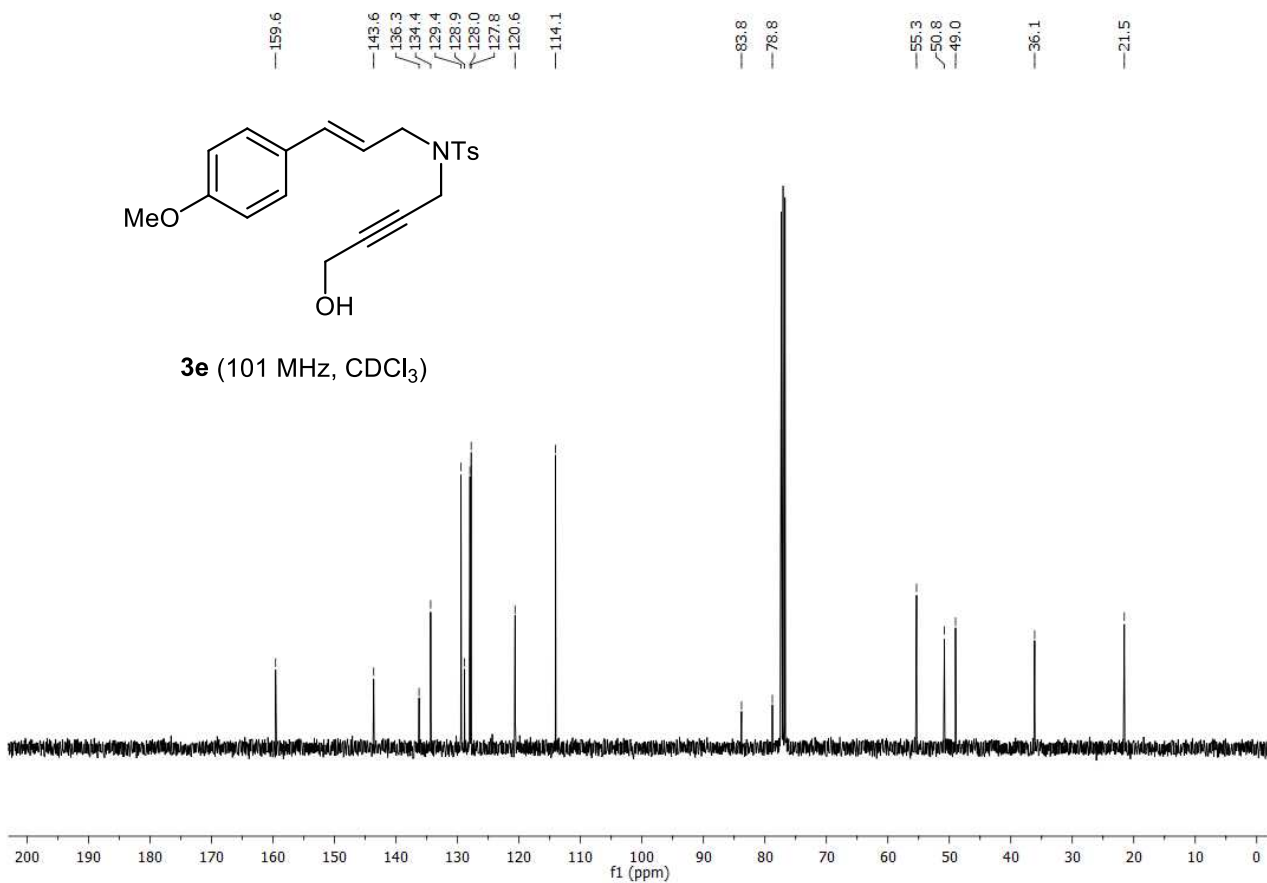



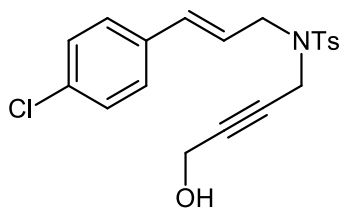

**3f** (400 MHz, CDCl<sub>3</sub>)

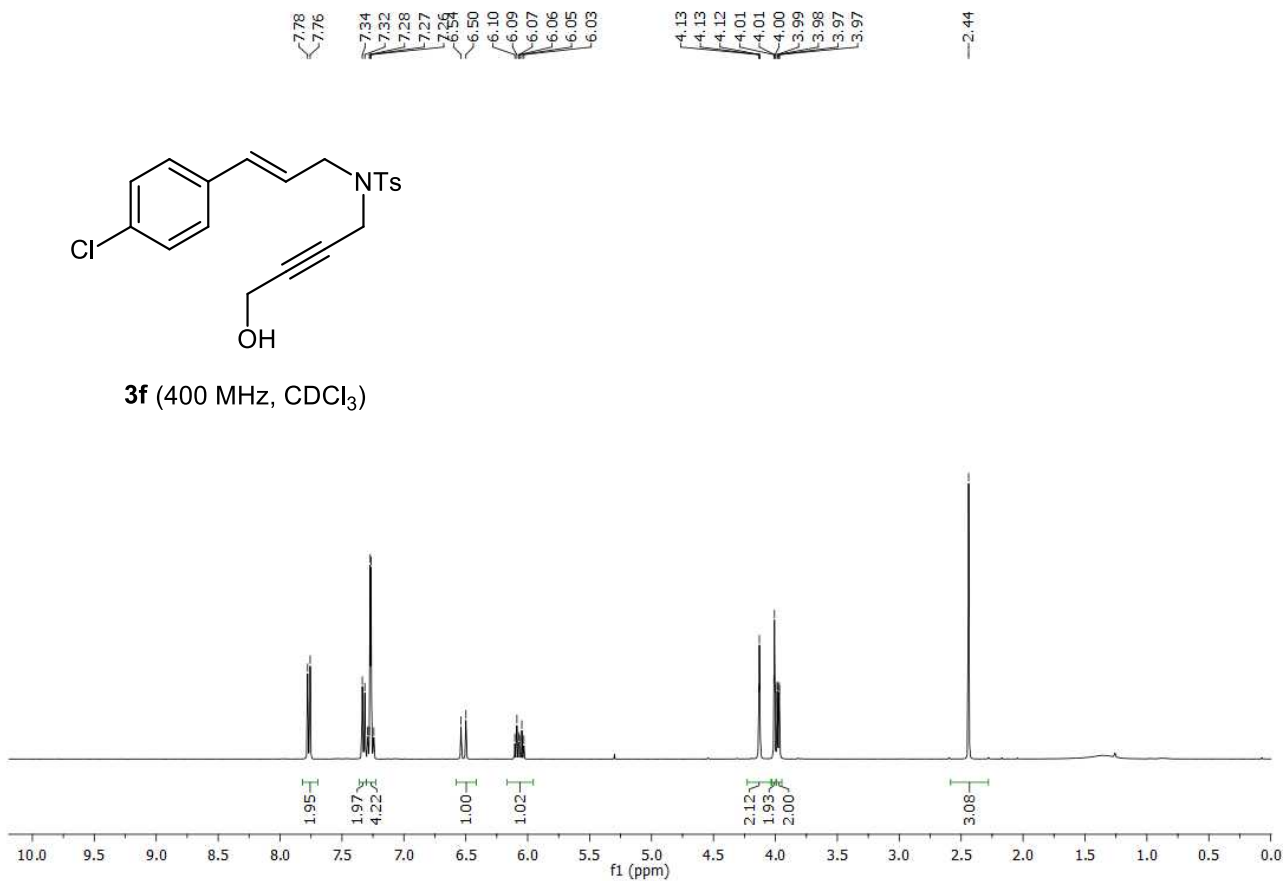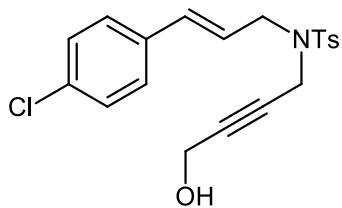

**3f** (101 MHz, CDCl<sub>3</sub>)

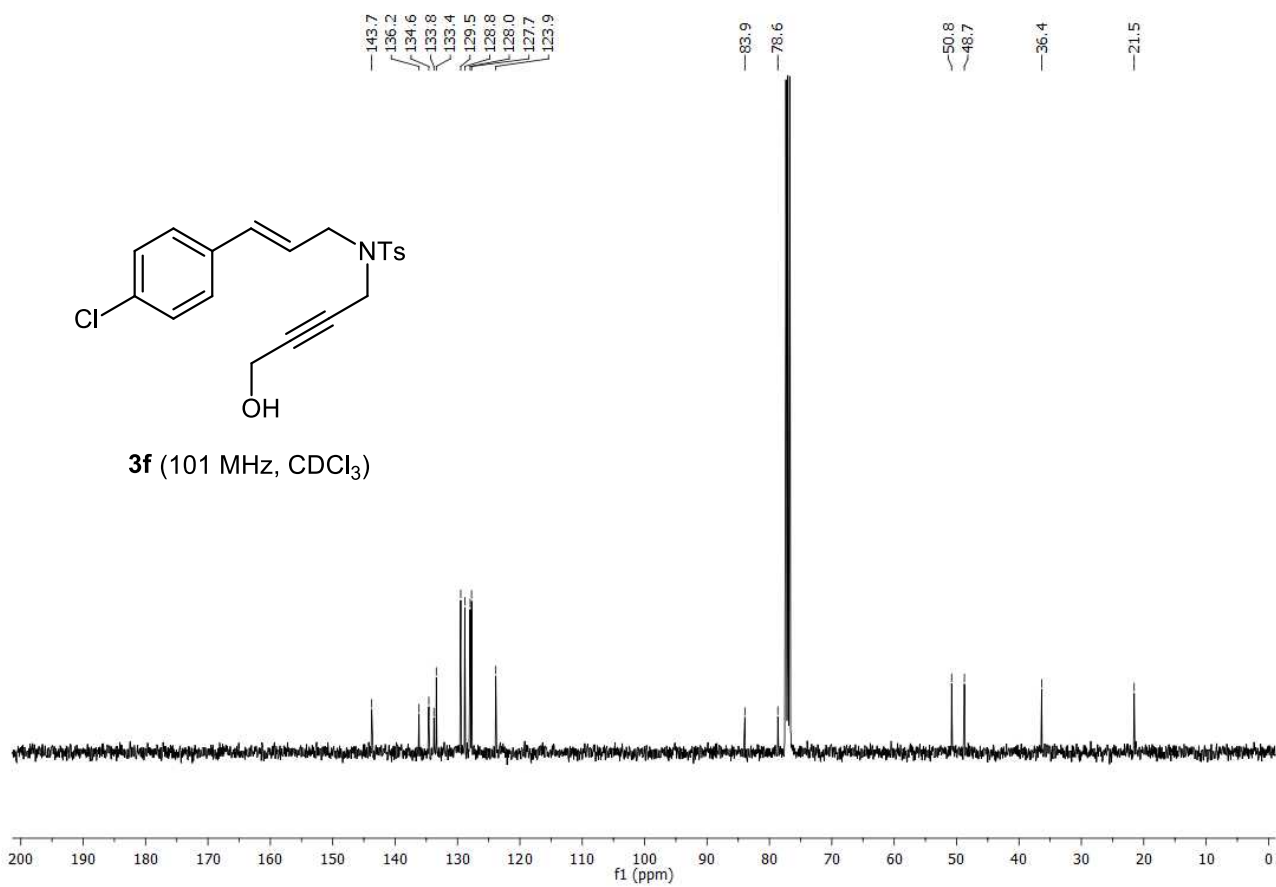

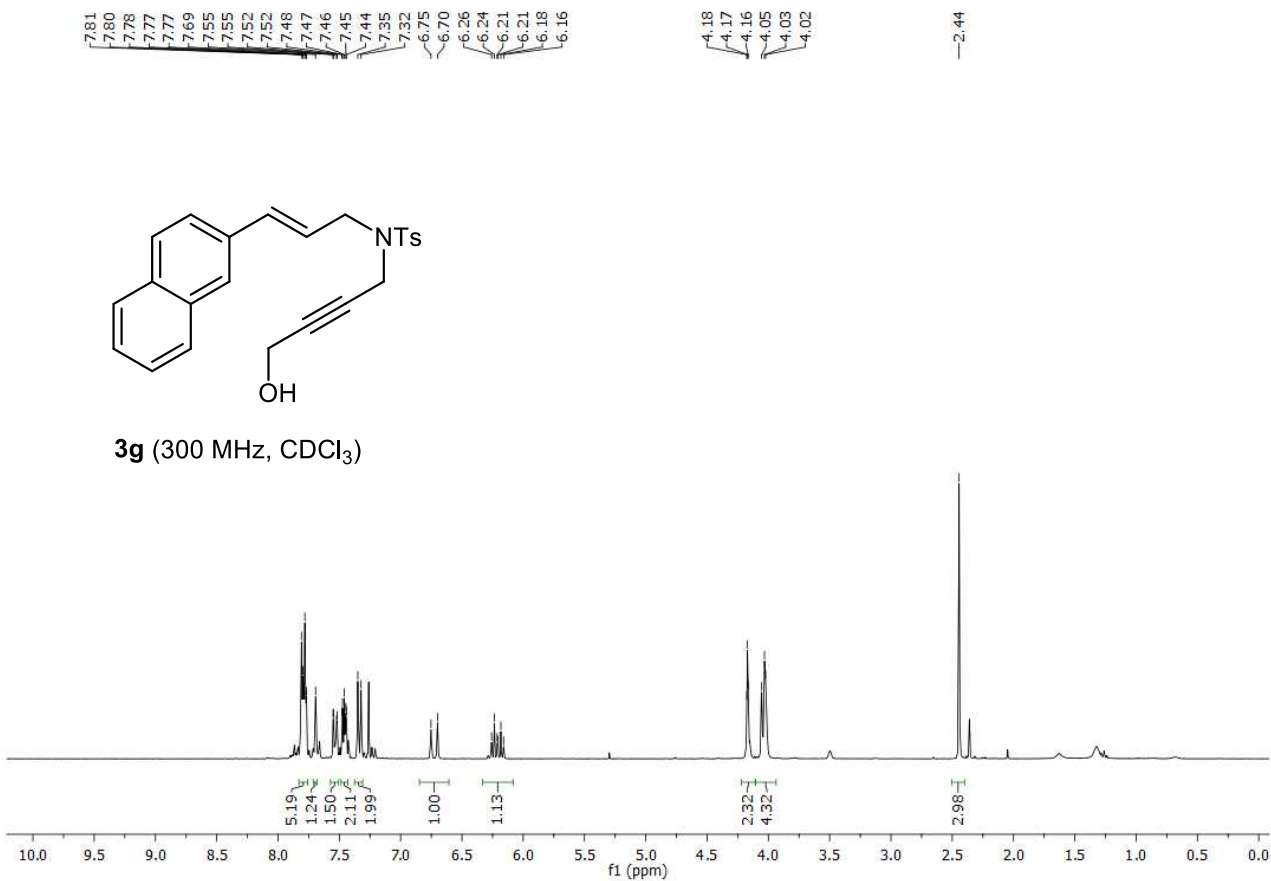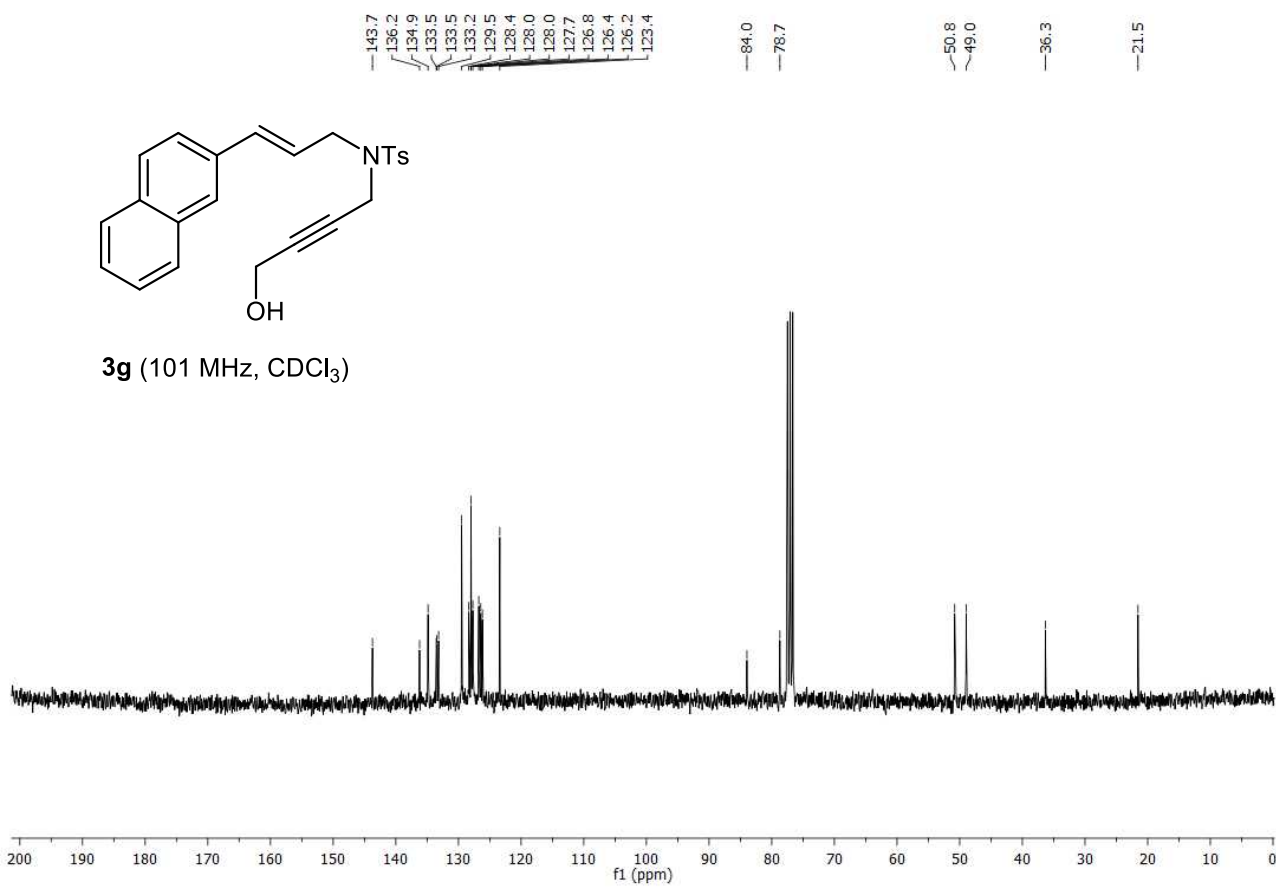

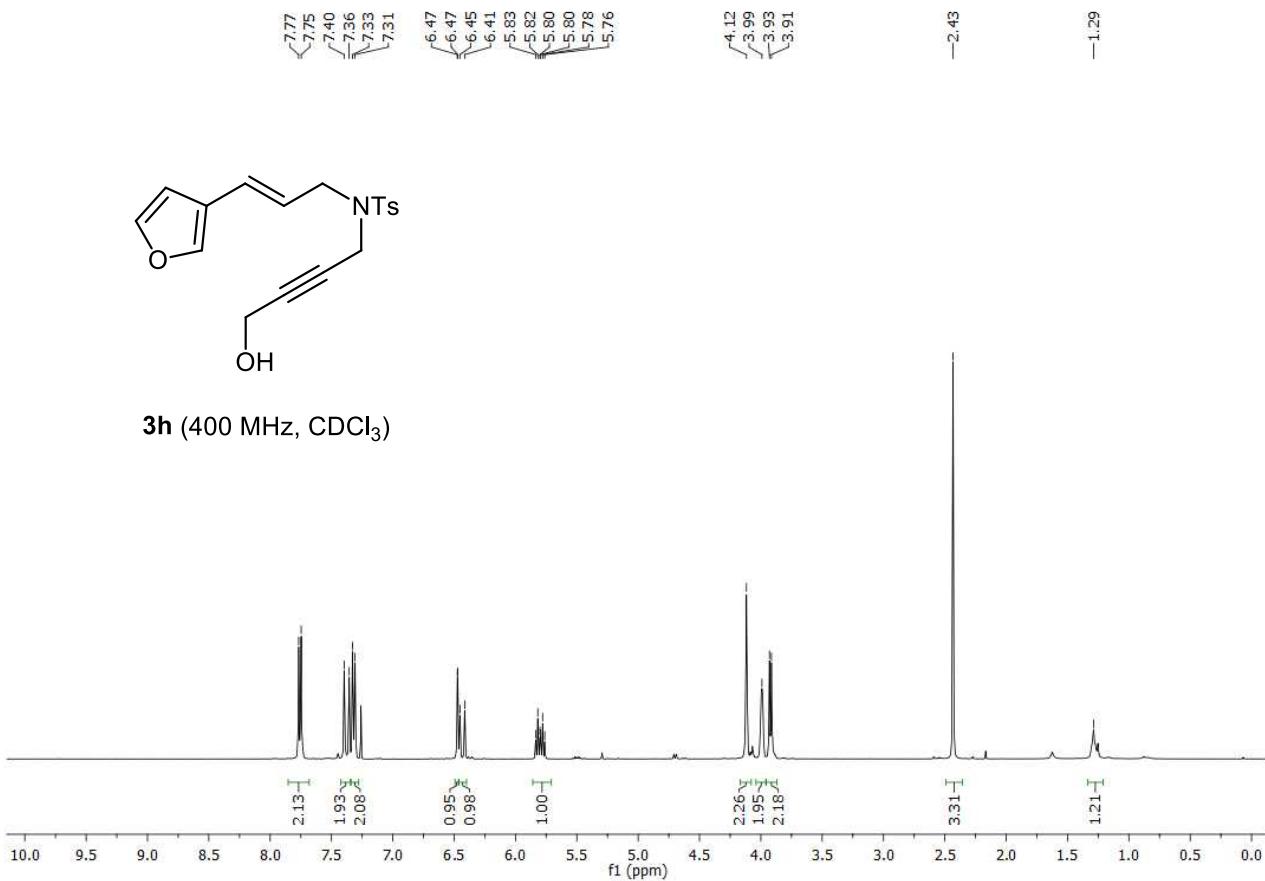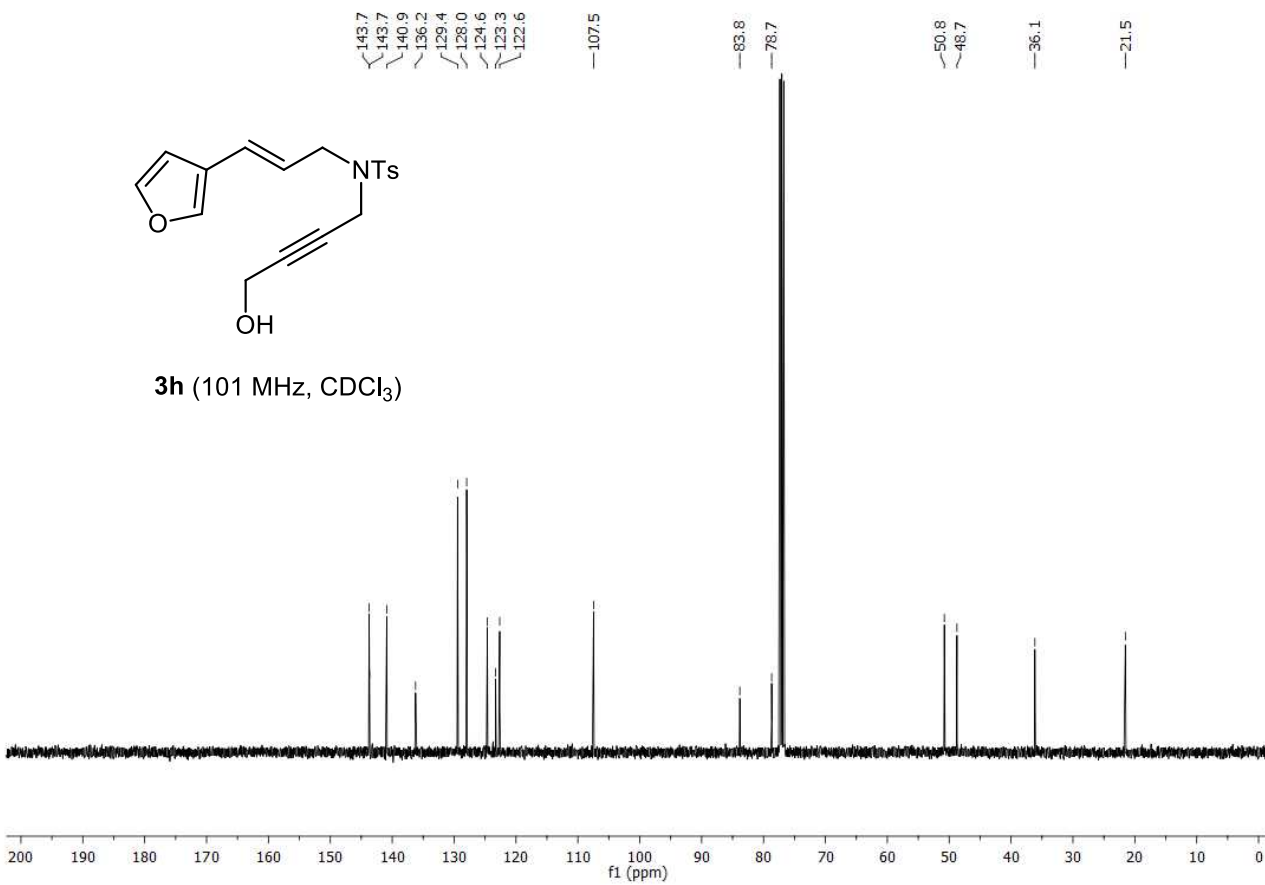

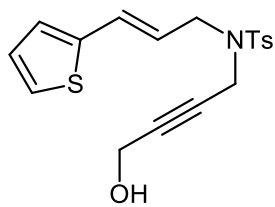

**3i** (400 MHz, CDCl<sub>3</sub>)

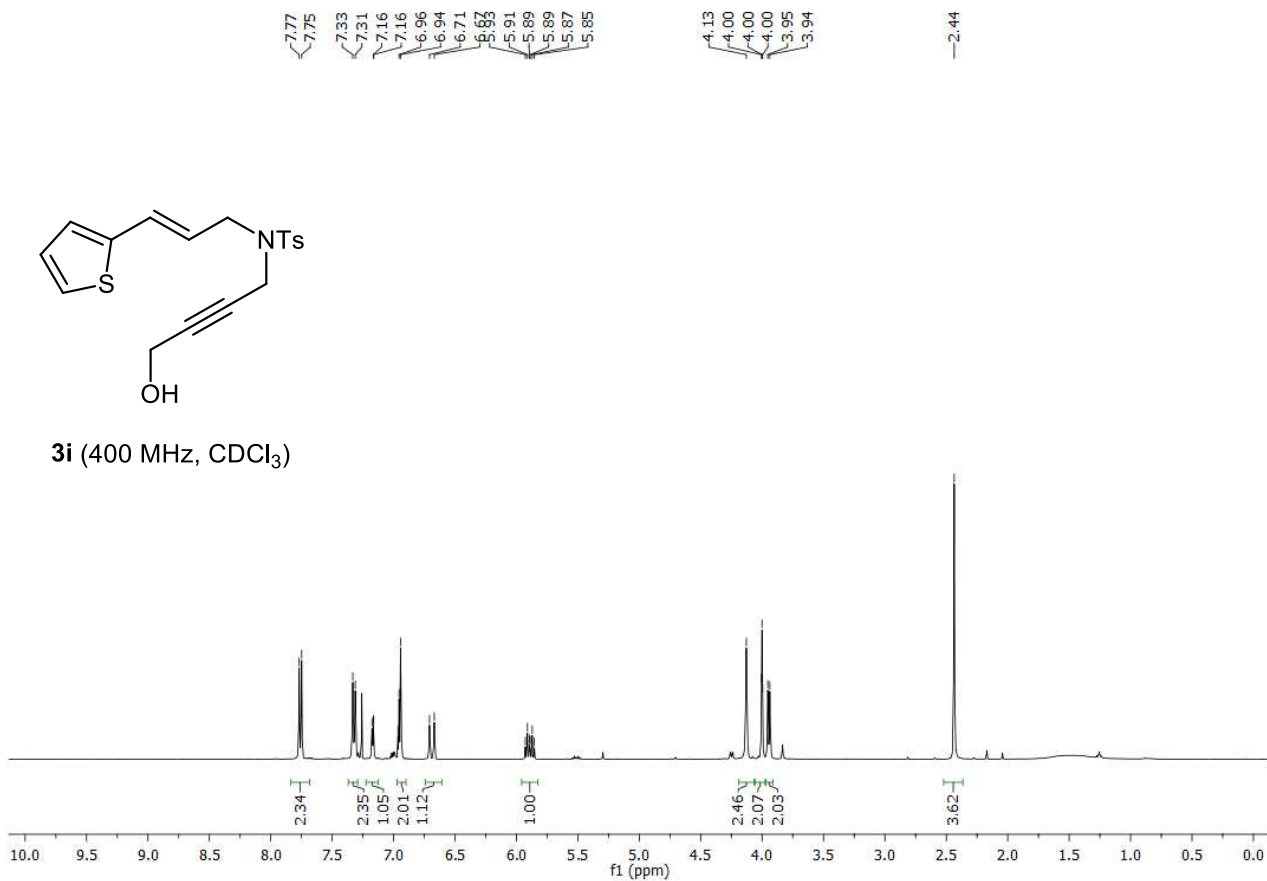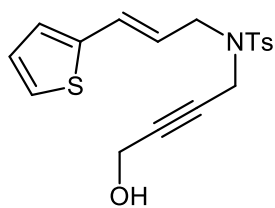

**3i** (101 MHz, CDCl<sub>3</sub>)

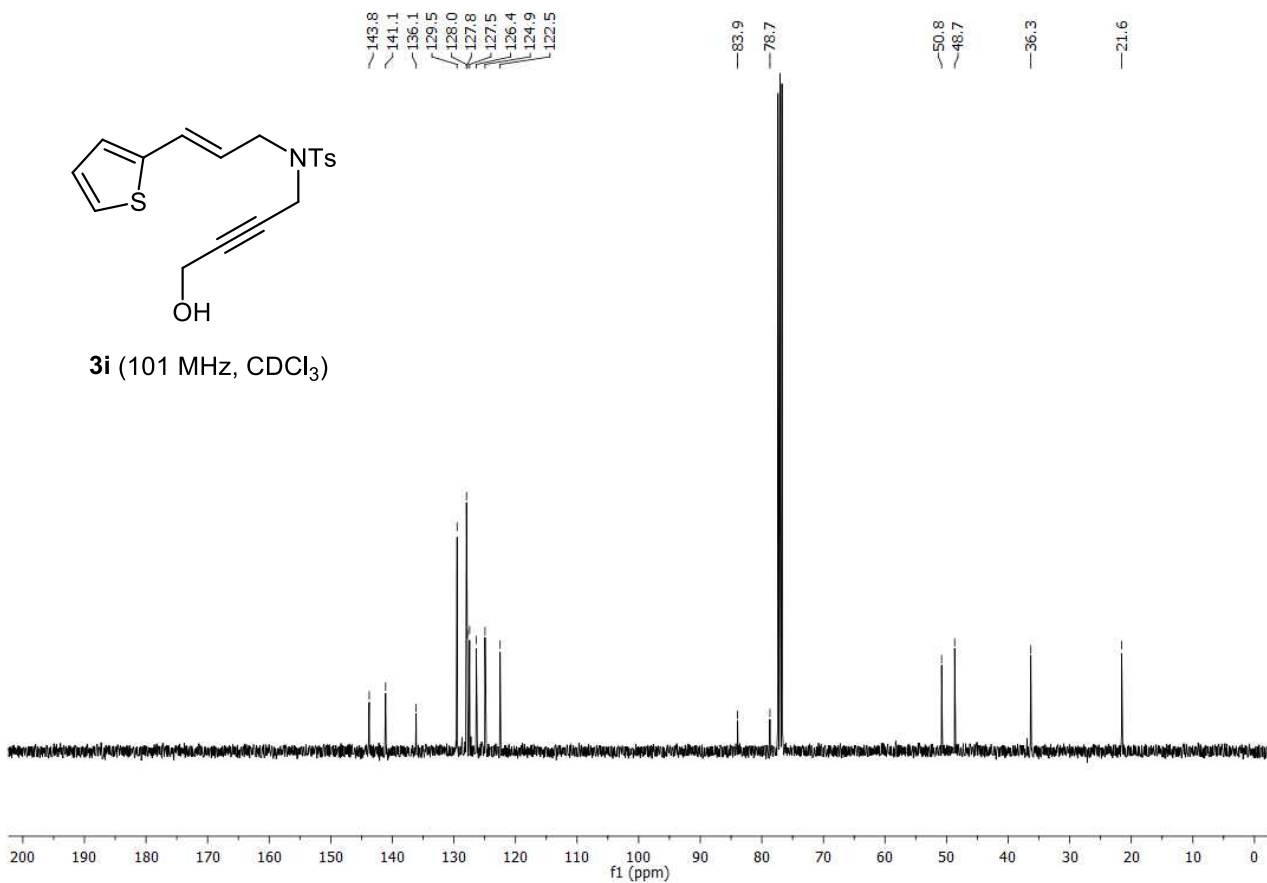

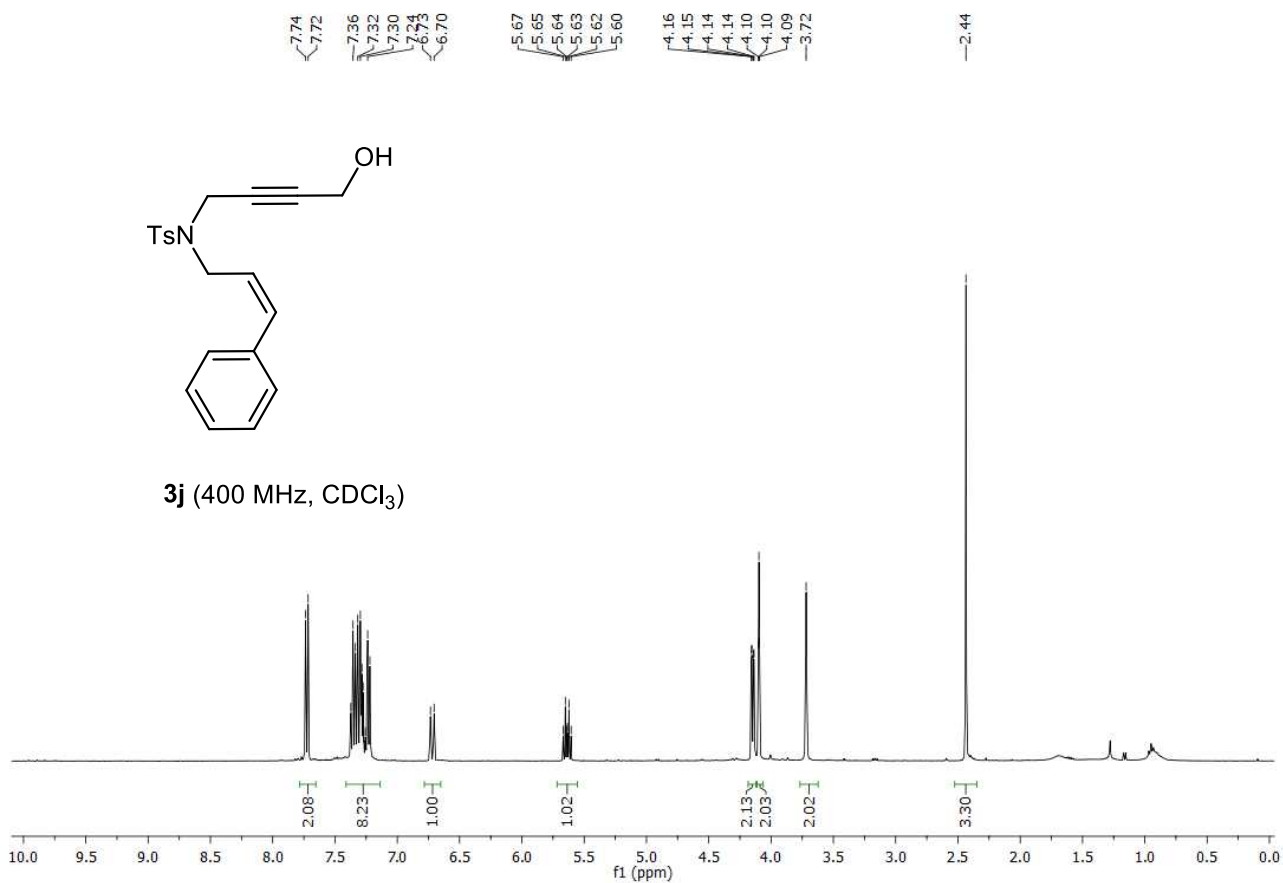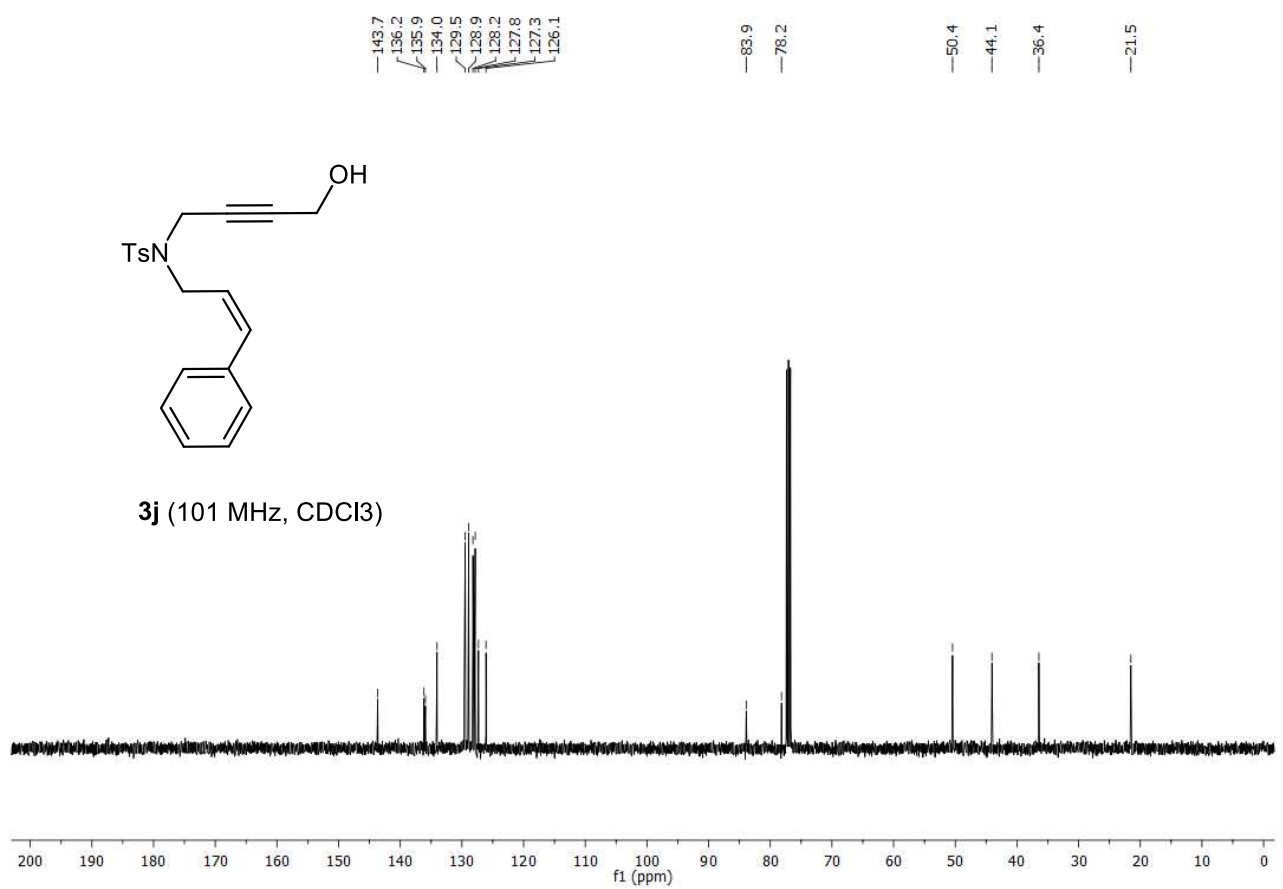

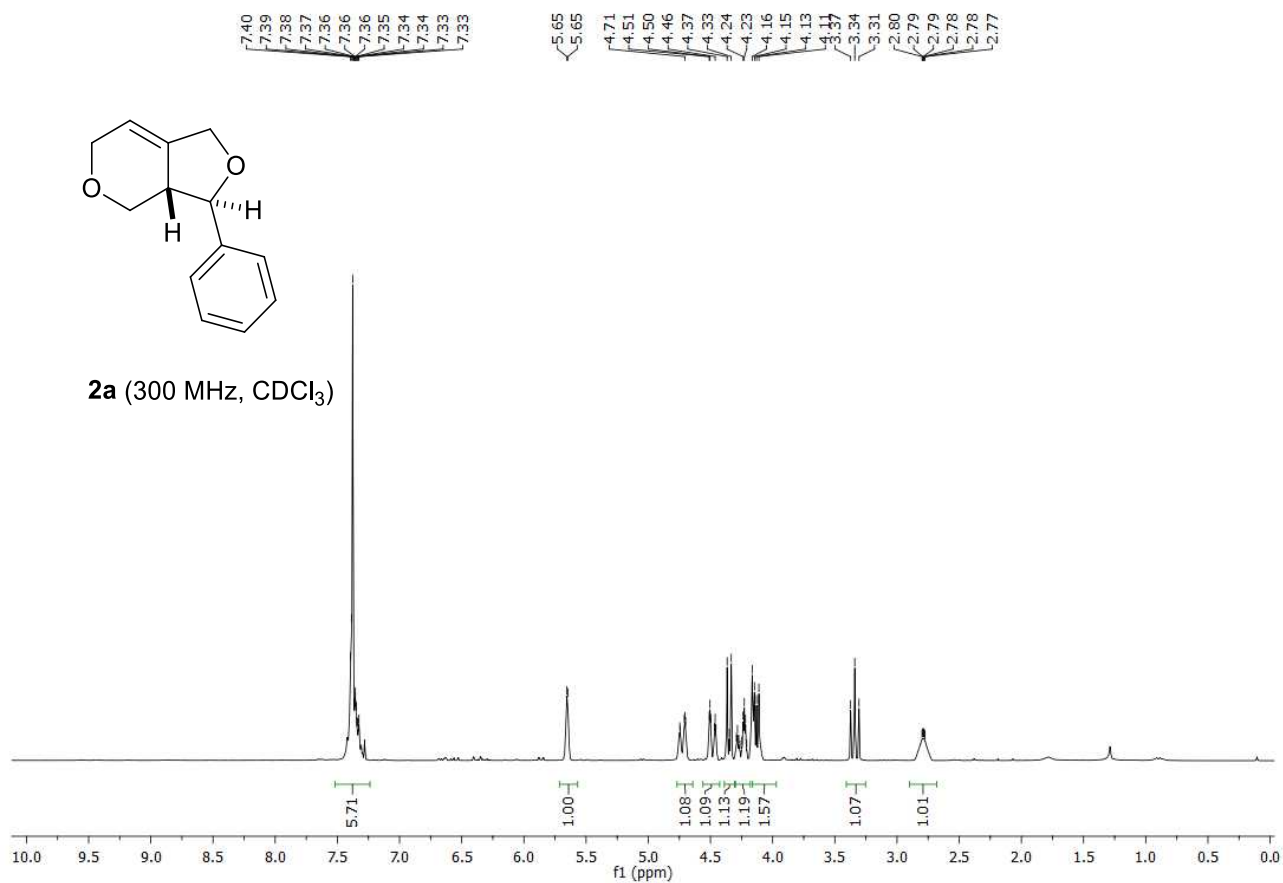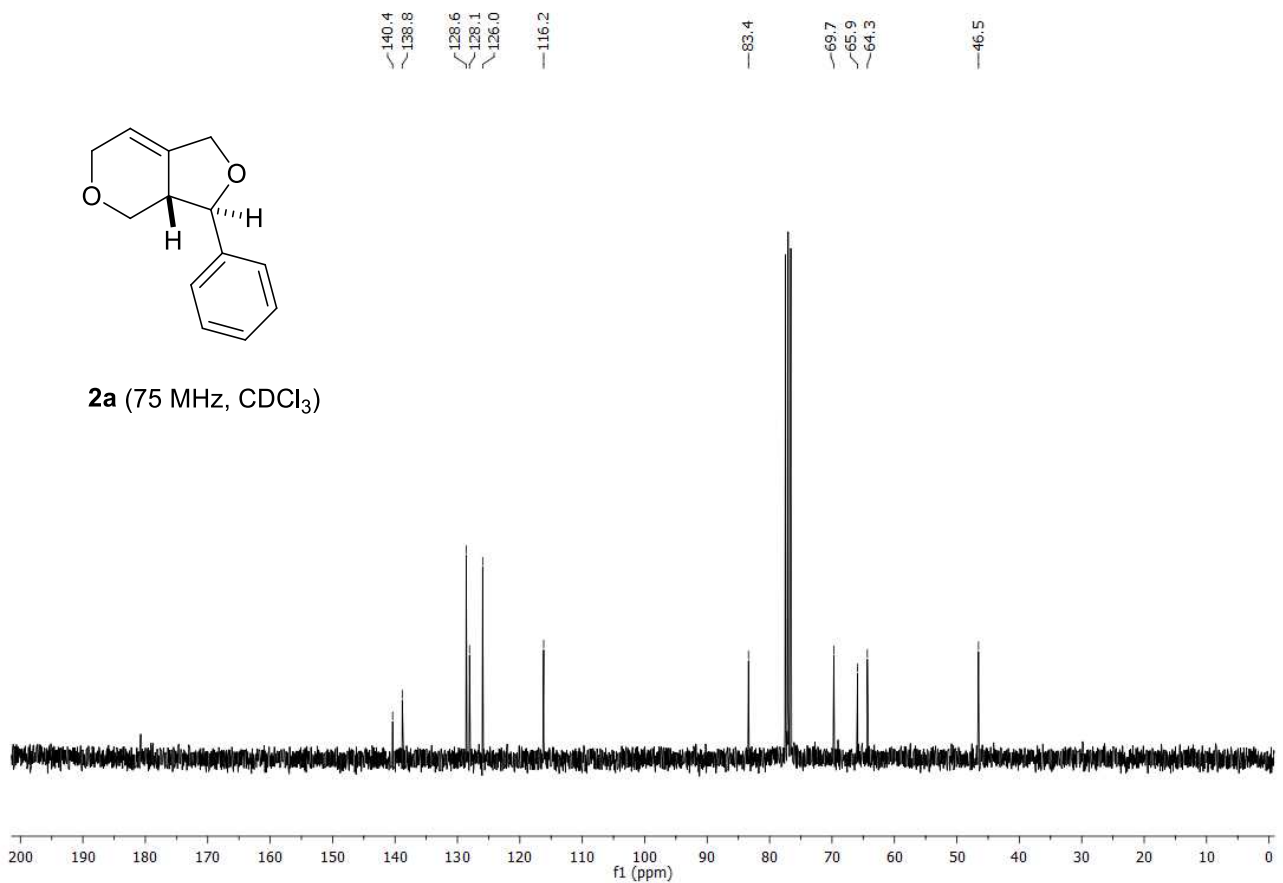

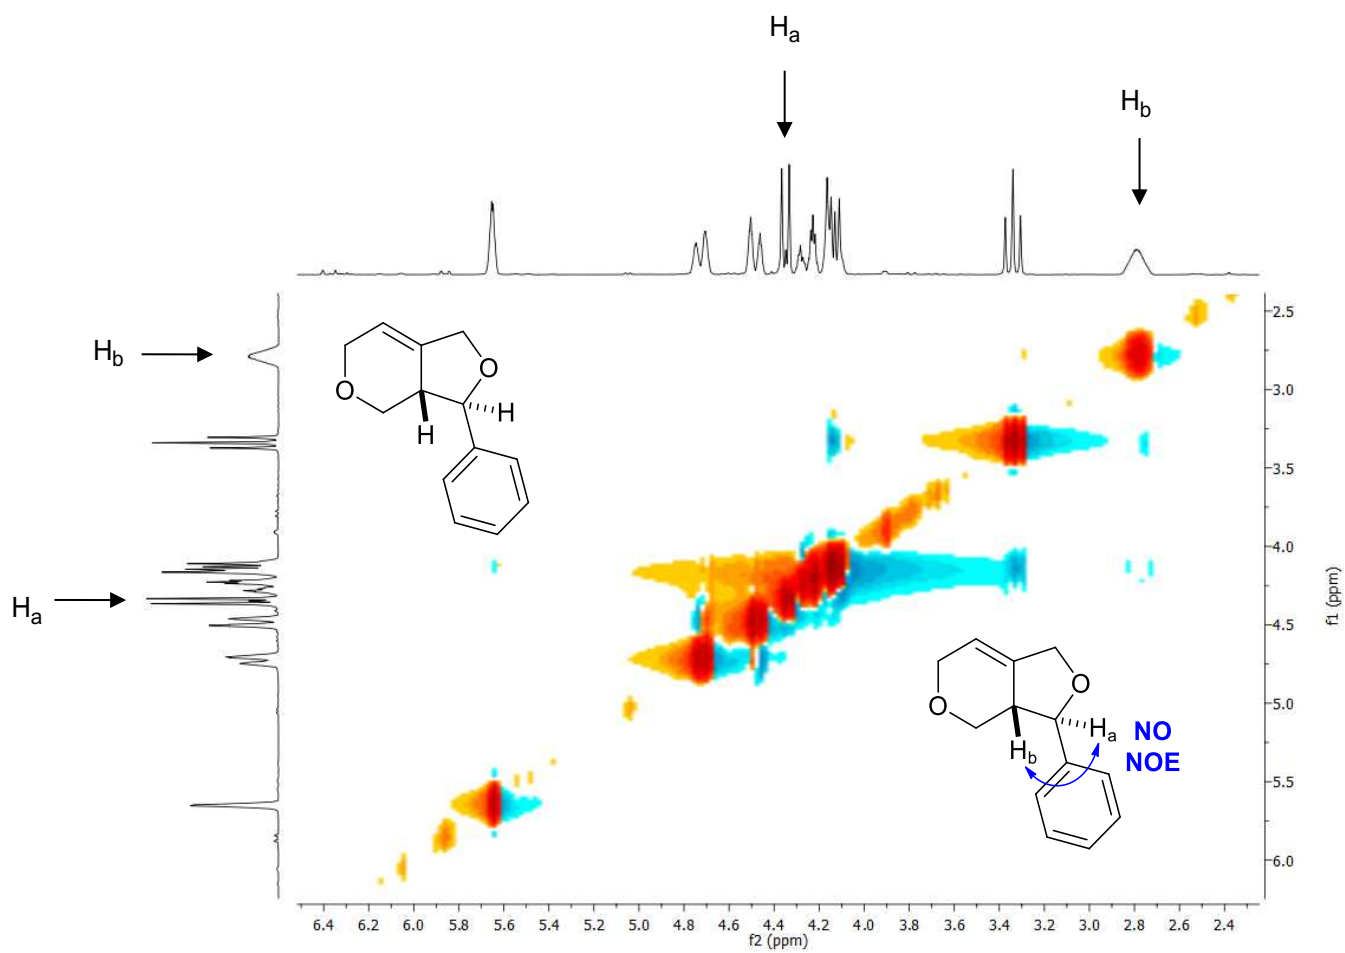

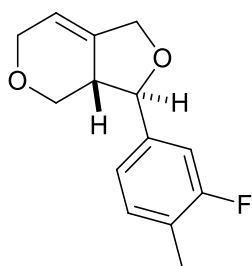

**2b** (300 MHz CDCl<sub>3</sub>)

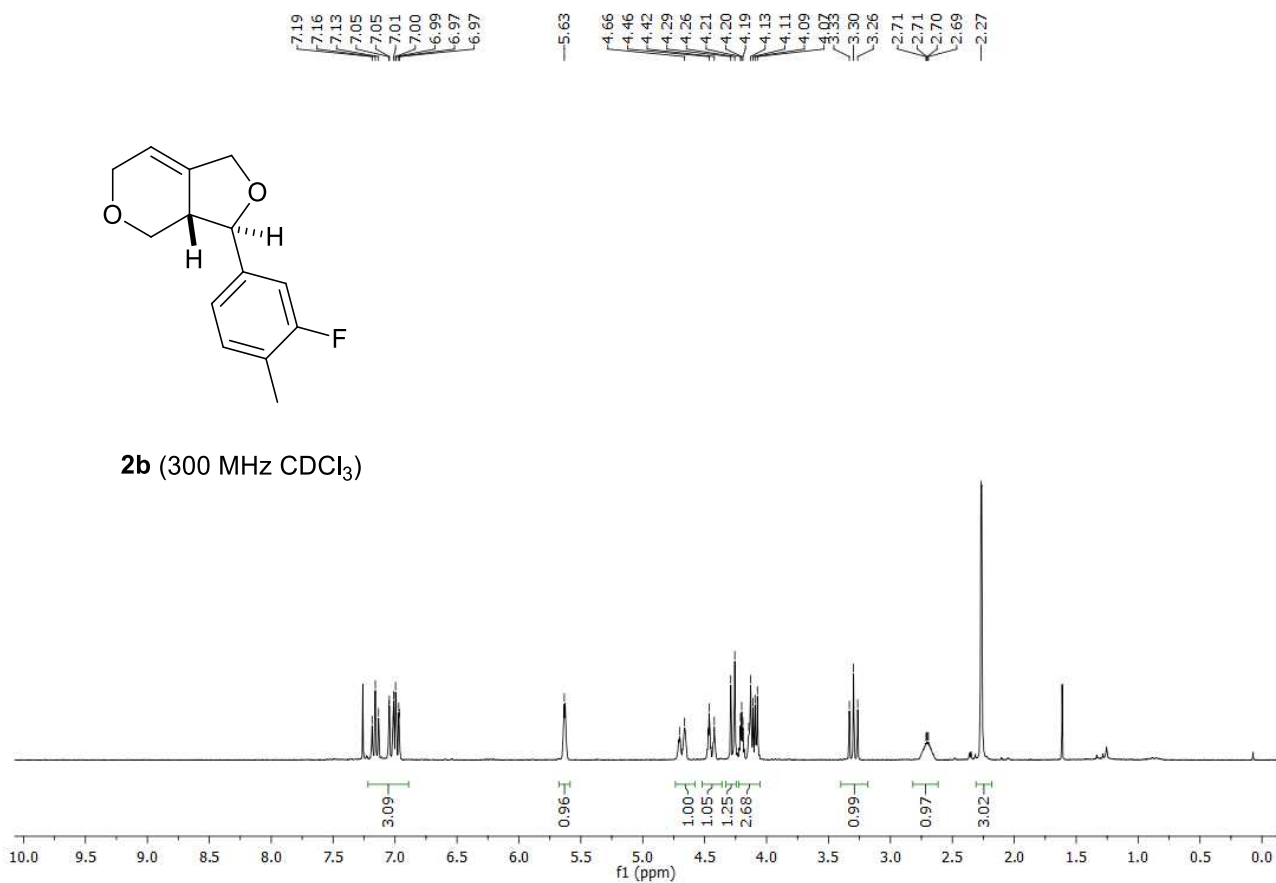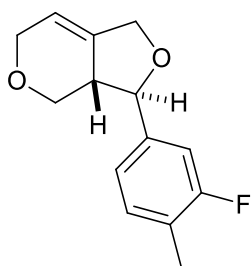

**2b** (75 MHz CDCl<sub>3</sub>)

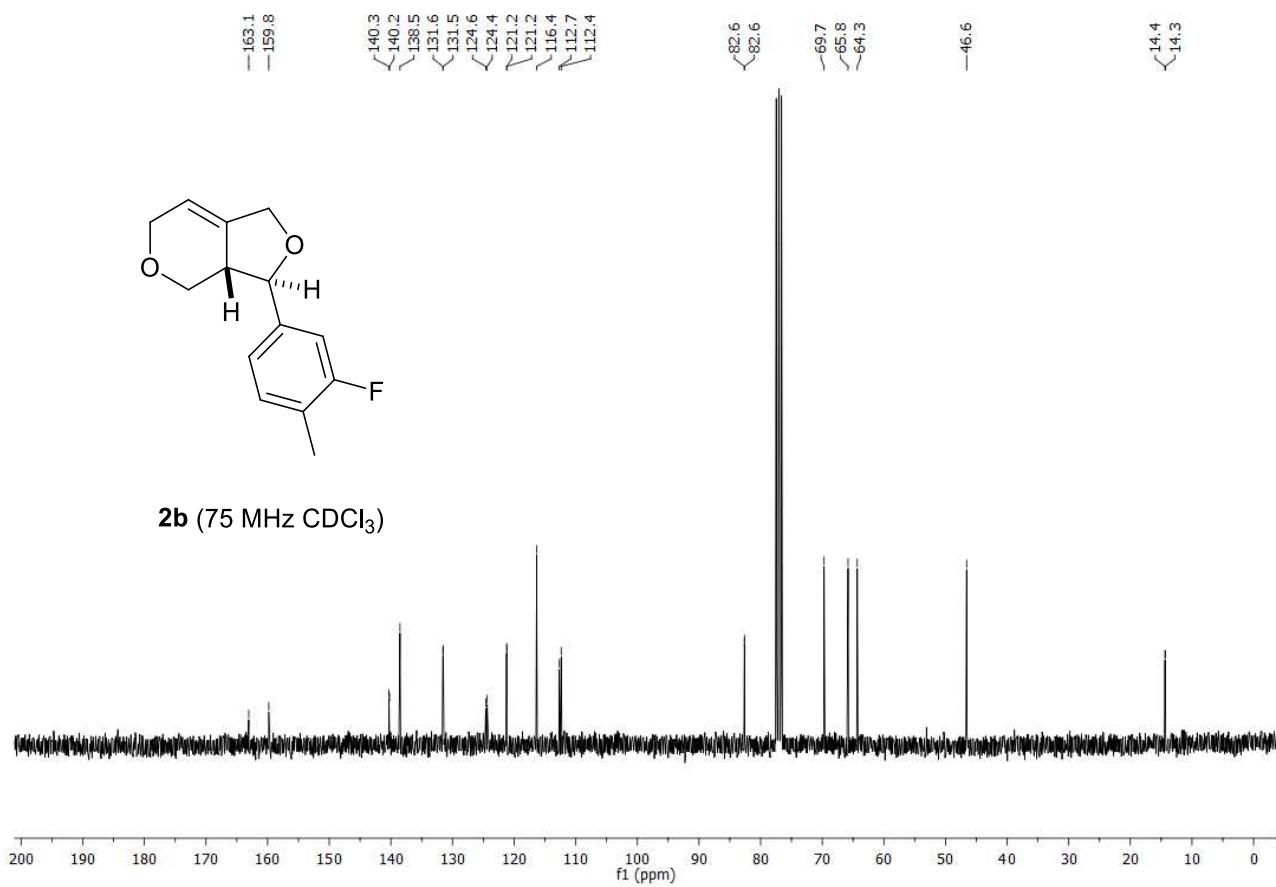



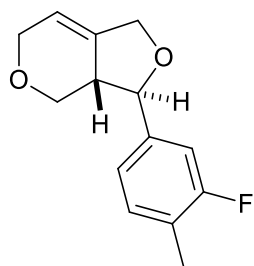

**2b** (565 MHz CDCl<sub>3</sub>)

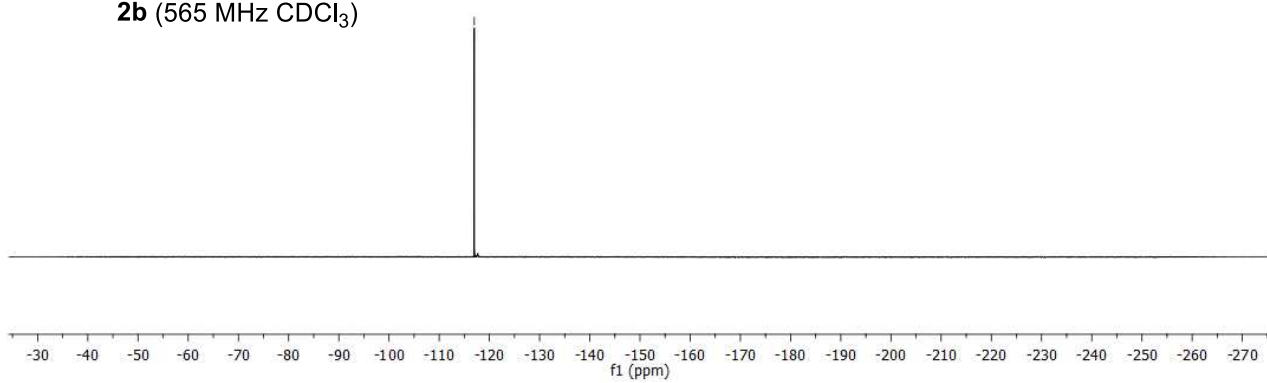

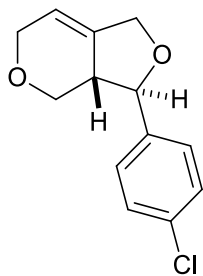

**2c** (400 MHz, CDCl<sub>3</sub>)

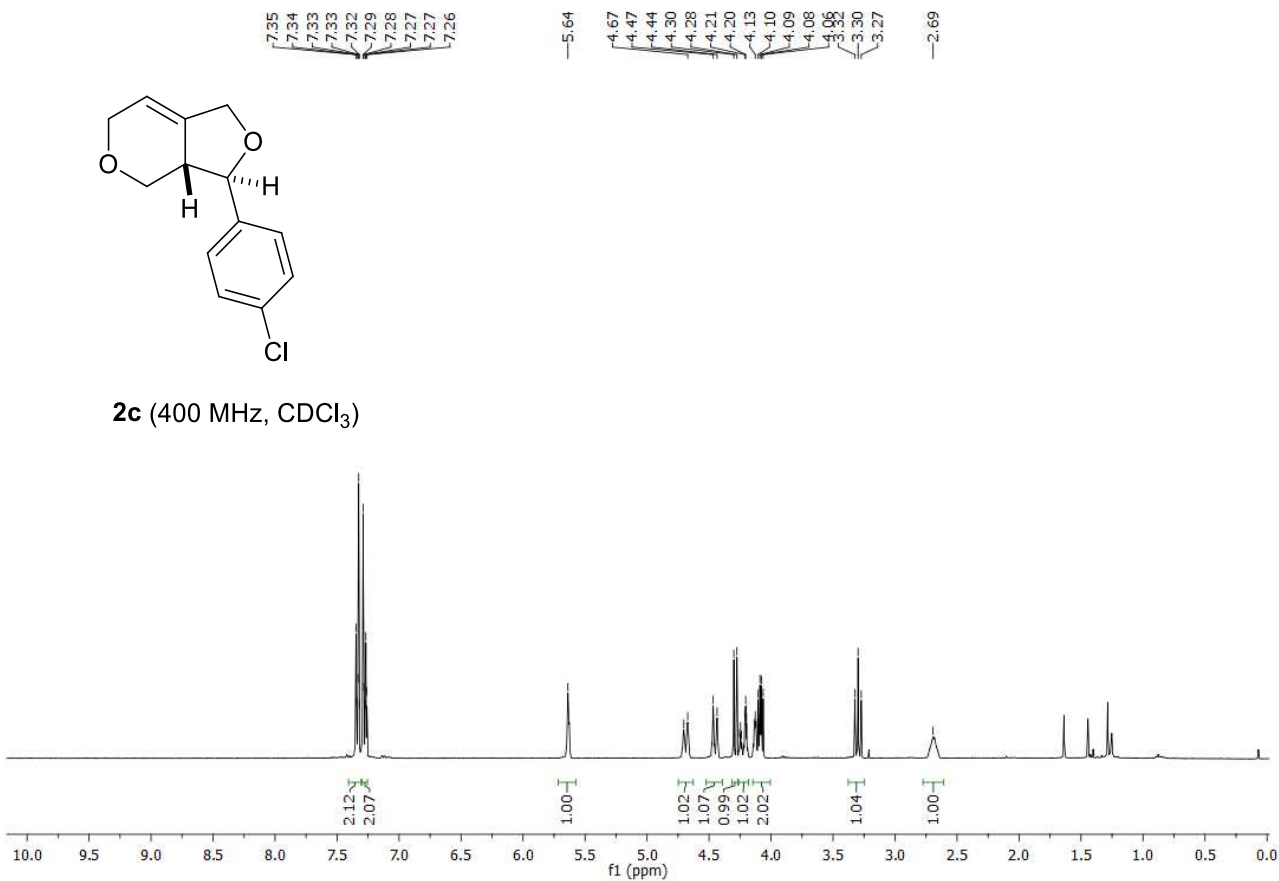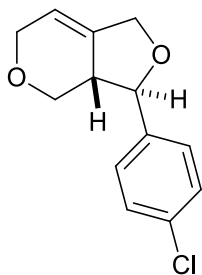

**2c** (101 MHz, CDCl<sub>3</sub>)

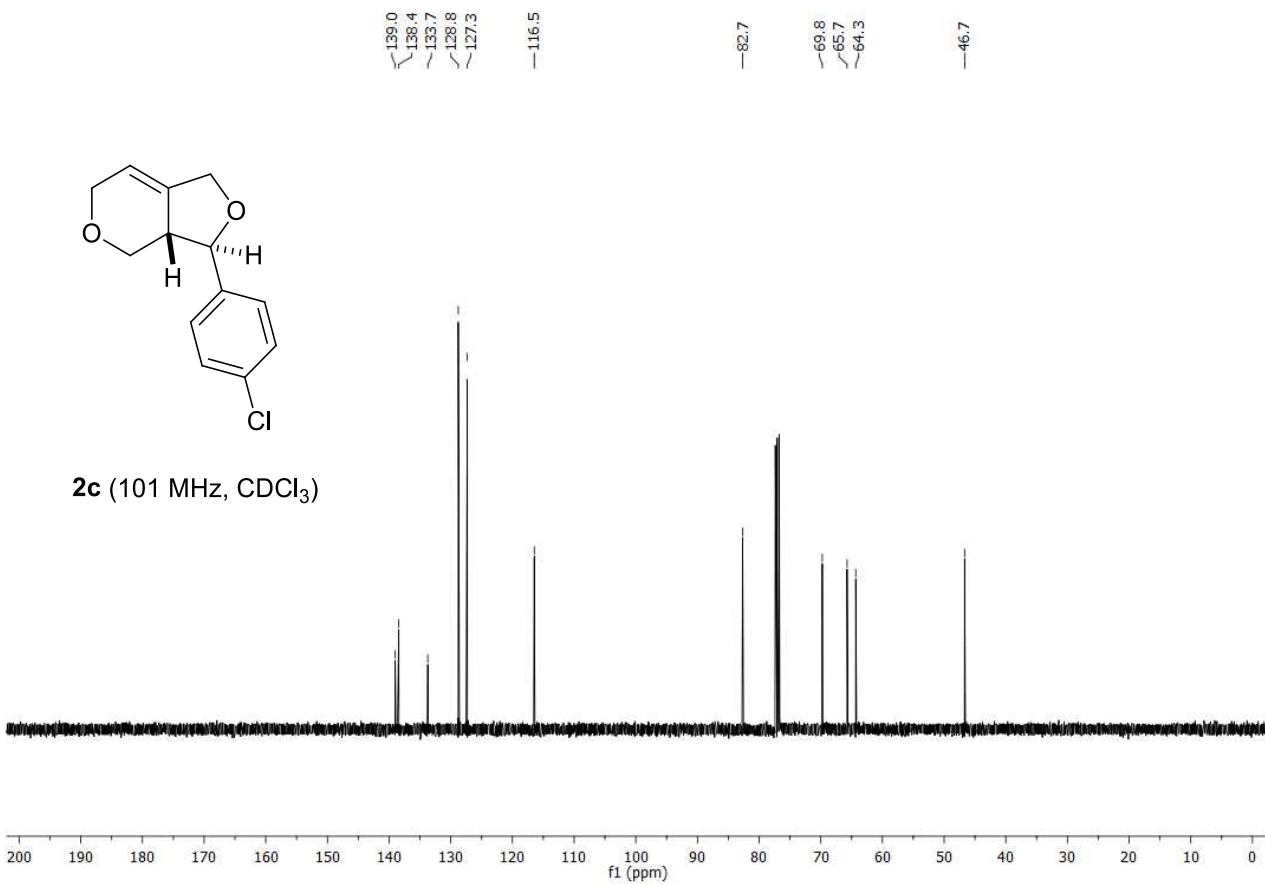

8.09  
8.08  
8.05  
7.90  
7.90  
7.88  
7.88  
7.87  
7.85  
7.82  
7.70  
7.68  
7.55  
7.53  
7.52  
7.51  
7.50  
7.47

5.70  
5.10  
5.07  
4.79  
4.61  
4.26  
4.25  
4.24  
4.19  
4.14  
4.13  
4.11  
3.98  
3.45  
3.42  
3.39  
3.12

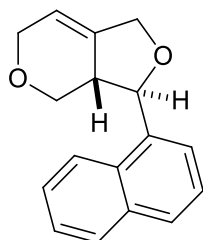

**2d** (300 MHz, CDCl<sub>3</sub>)

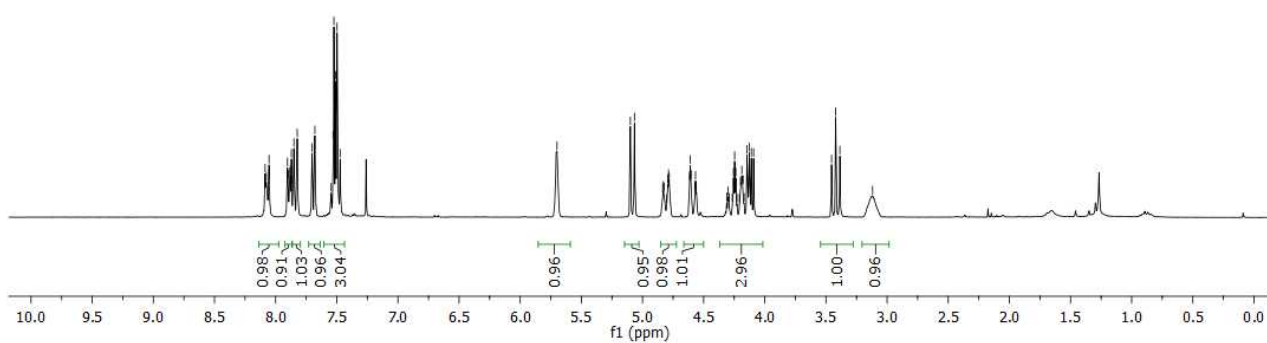

139.0  
135.3  
133.9  
131.3  
128.9  
128.8  
126.2  
125.7  
125.5  
123.6  
123.3  
116.3

80.6

69.6

66.5

64.5

45.4

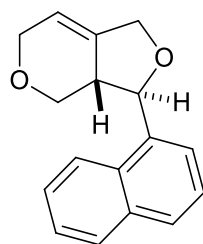

**2d** (75 MHz, CDCl<sub>3</sub>)

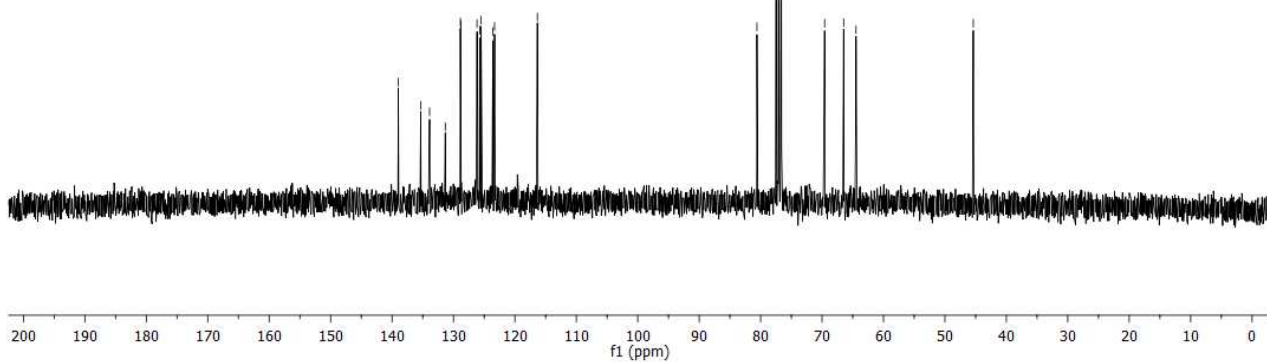

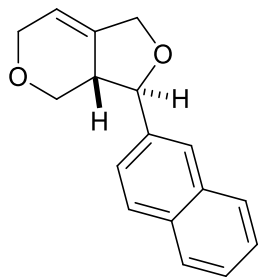

**2e** (400 MHz, CDCl<sub>3</sub>)

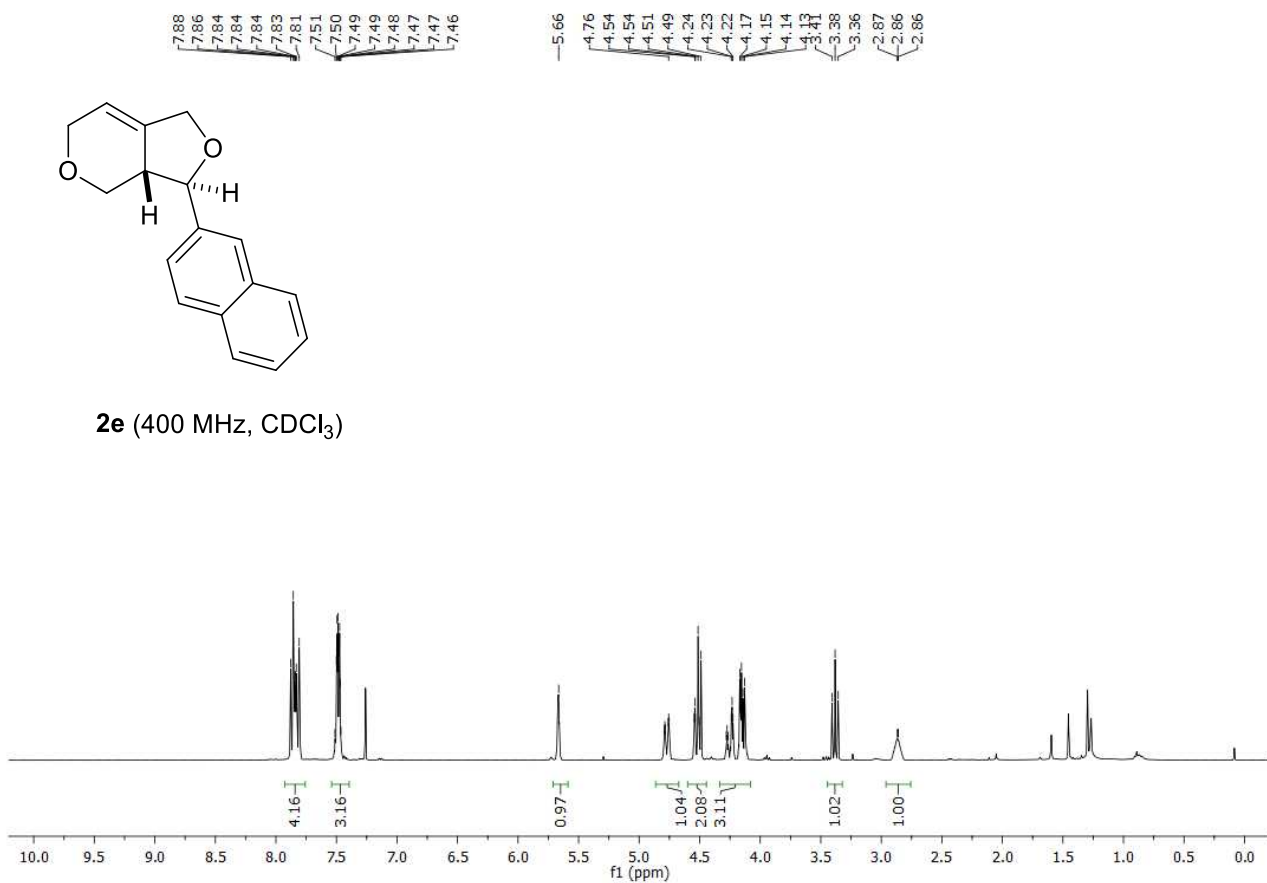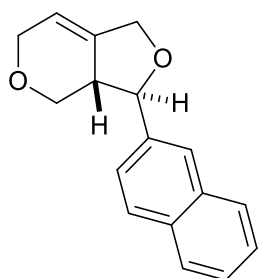

**2e** (101 MHz, CDCl<sub>3</sub>)

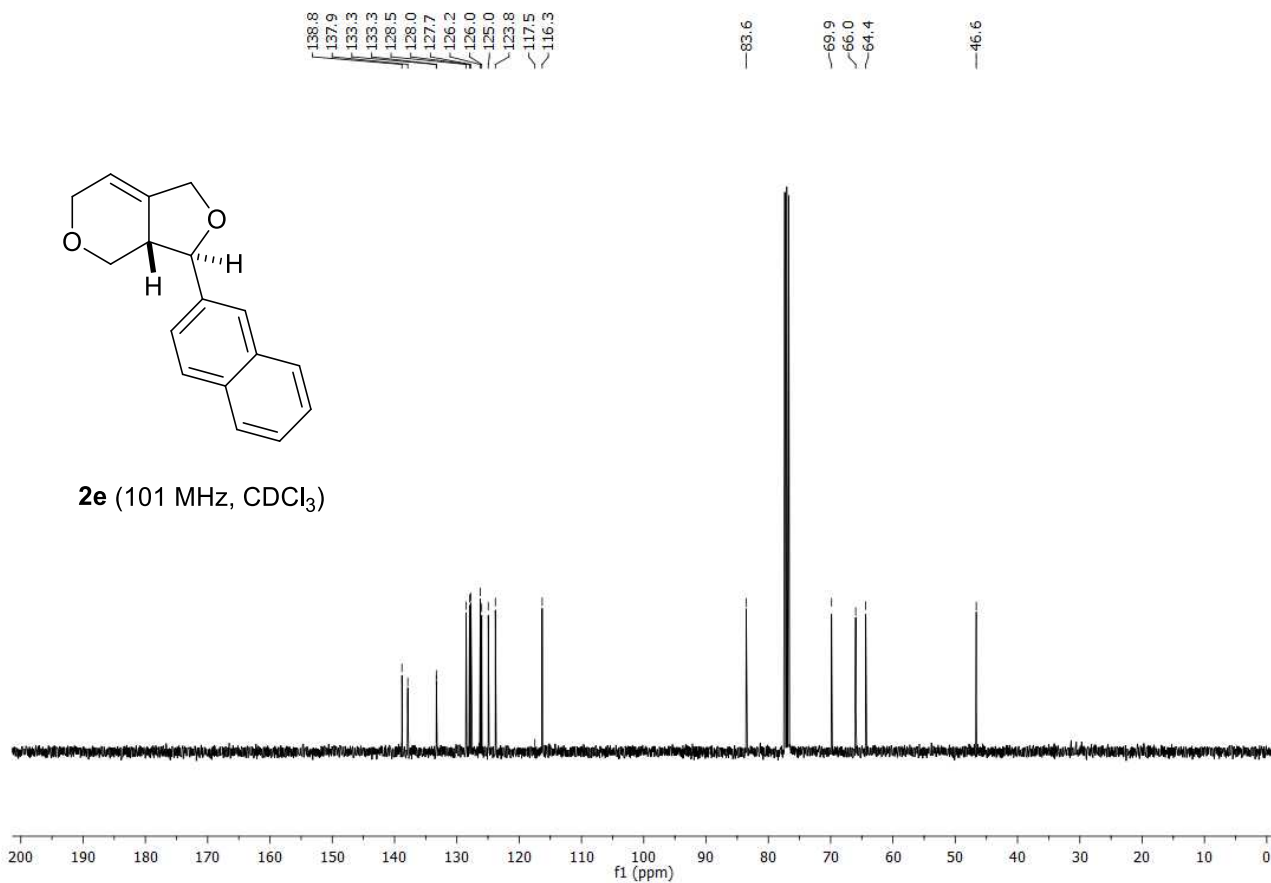

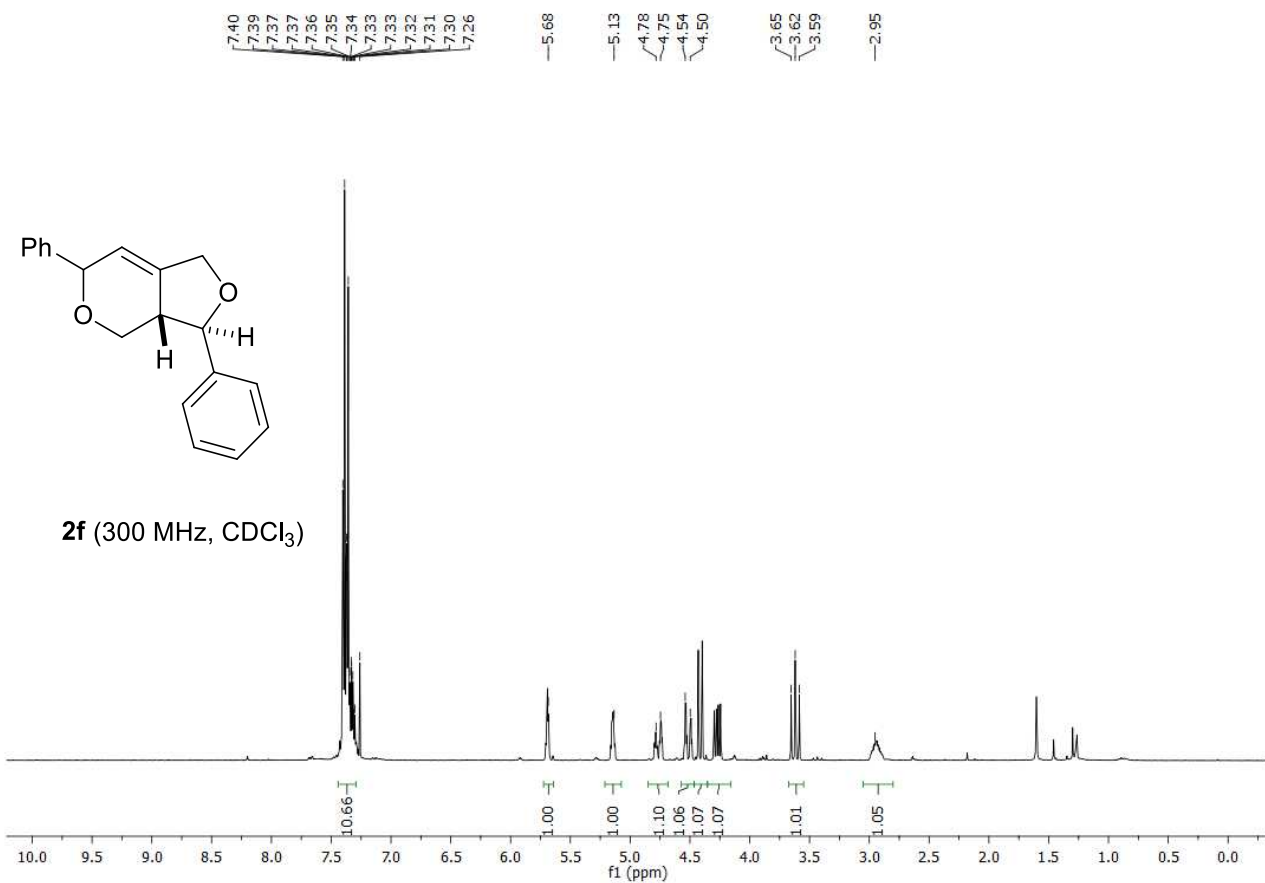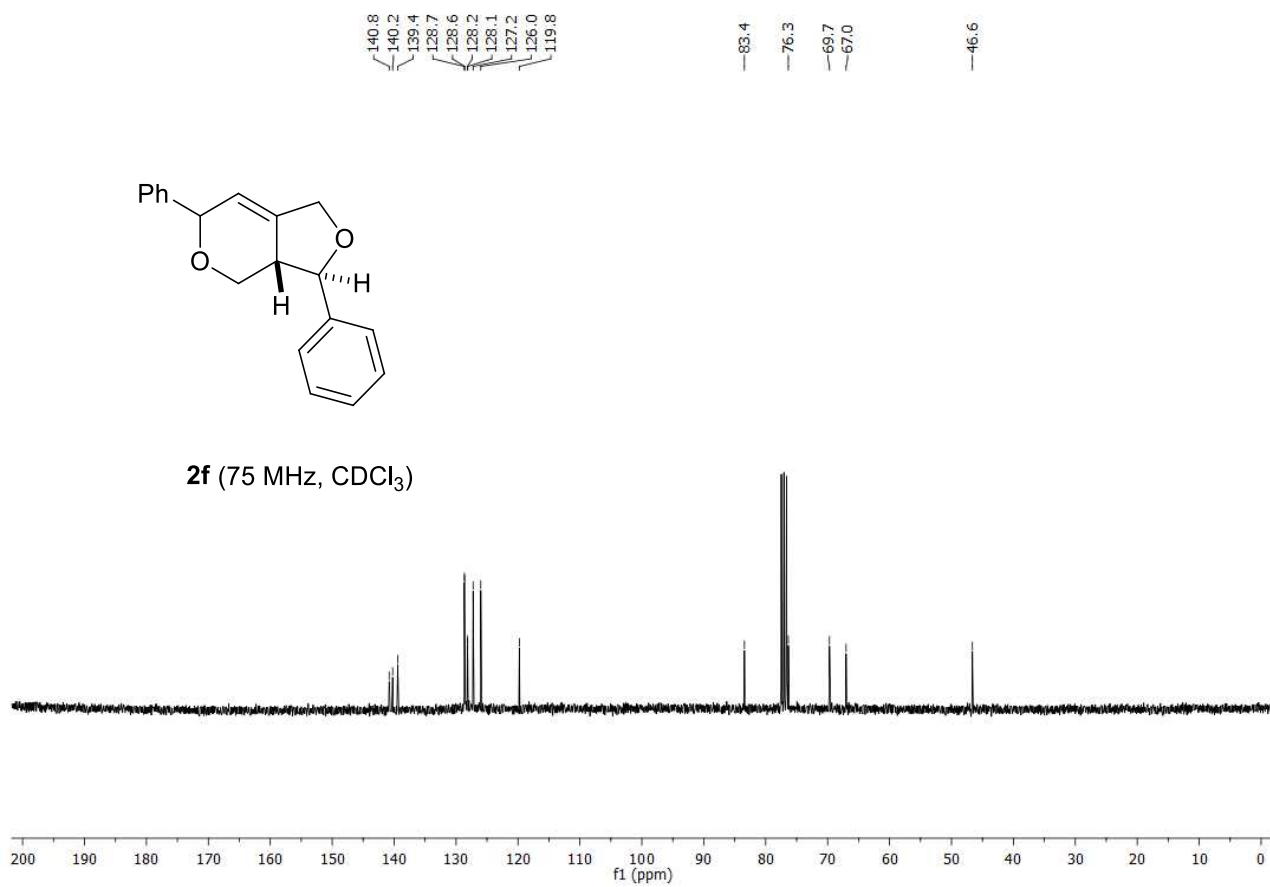

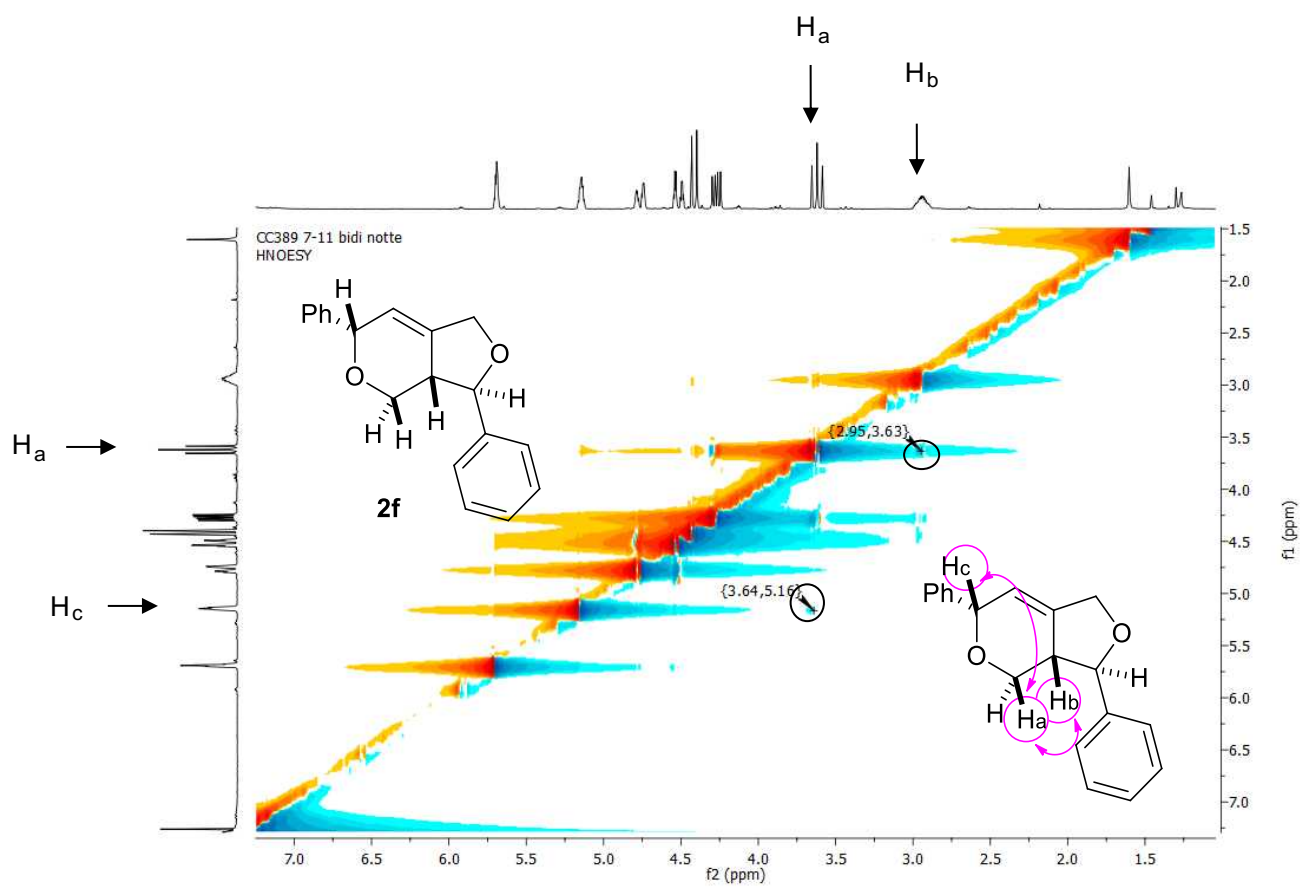

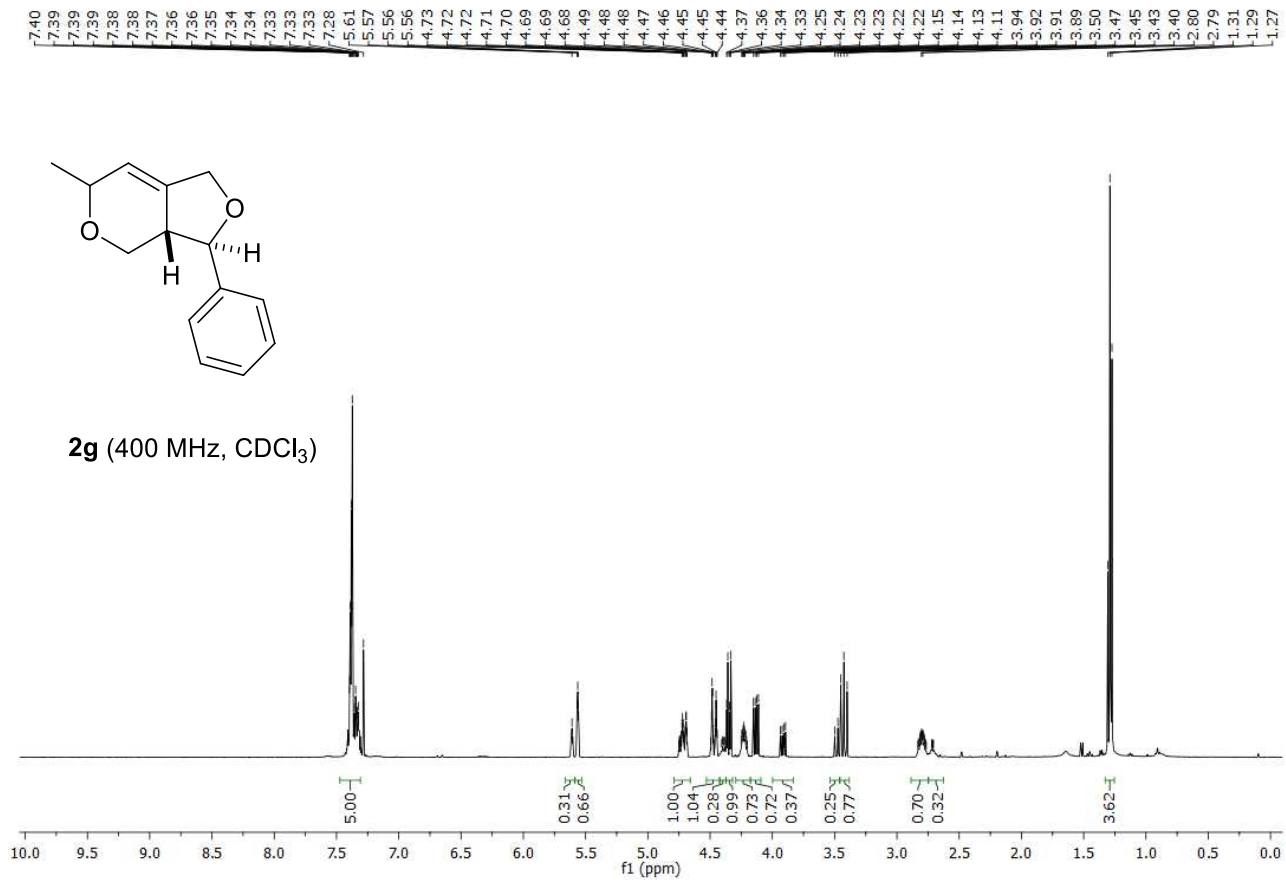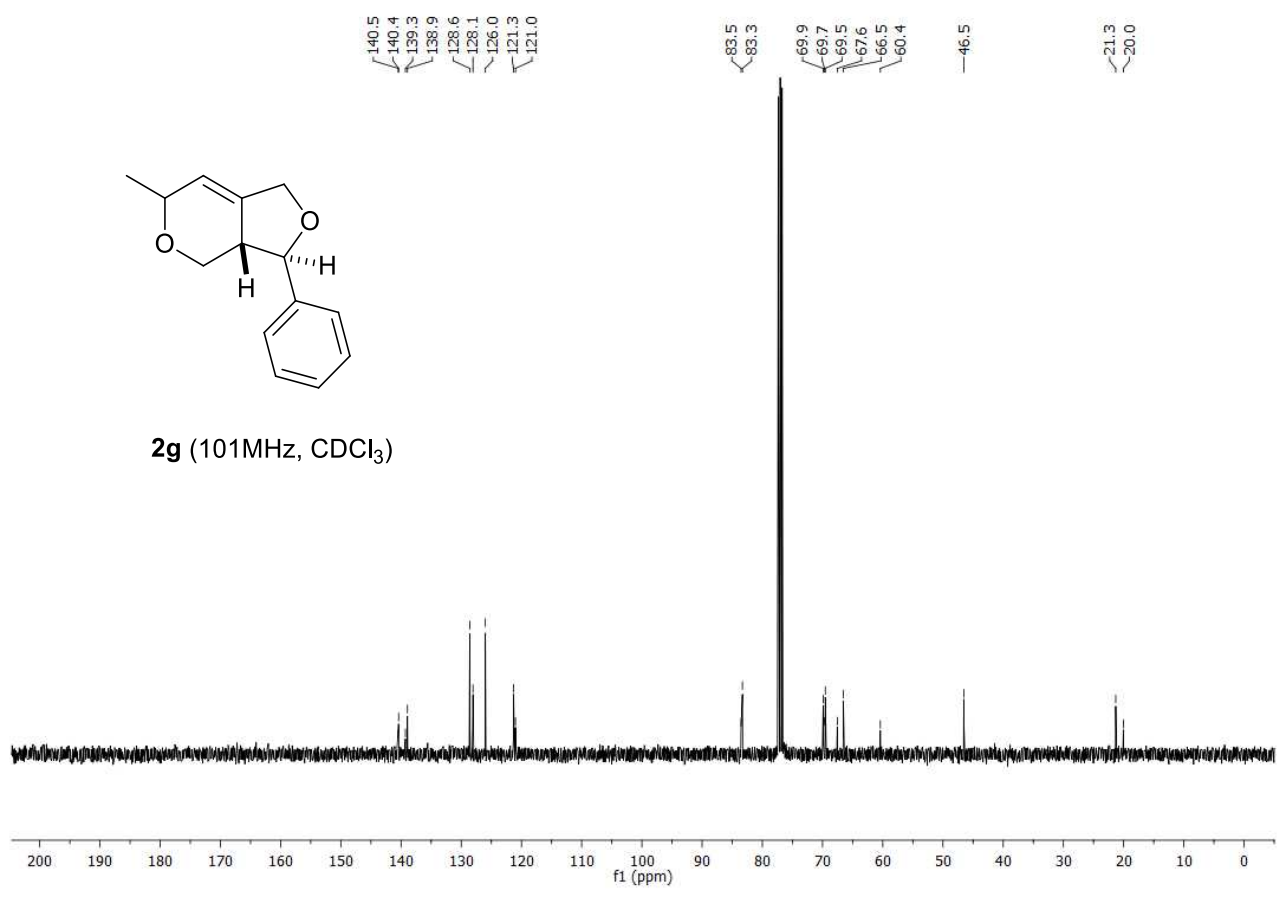

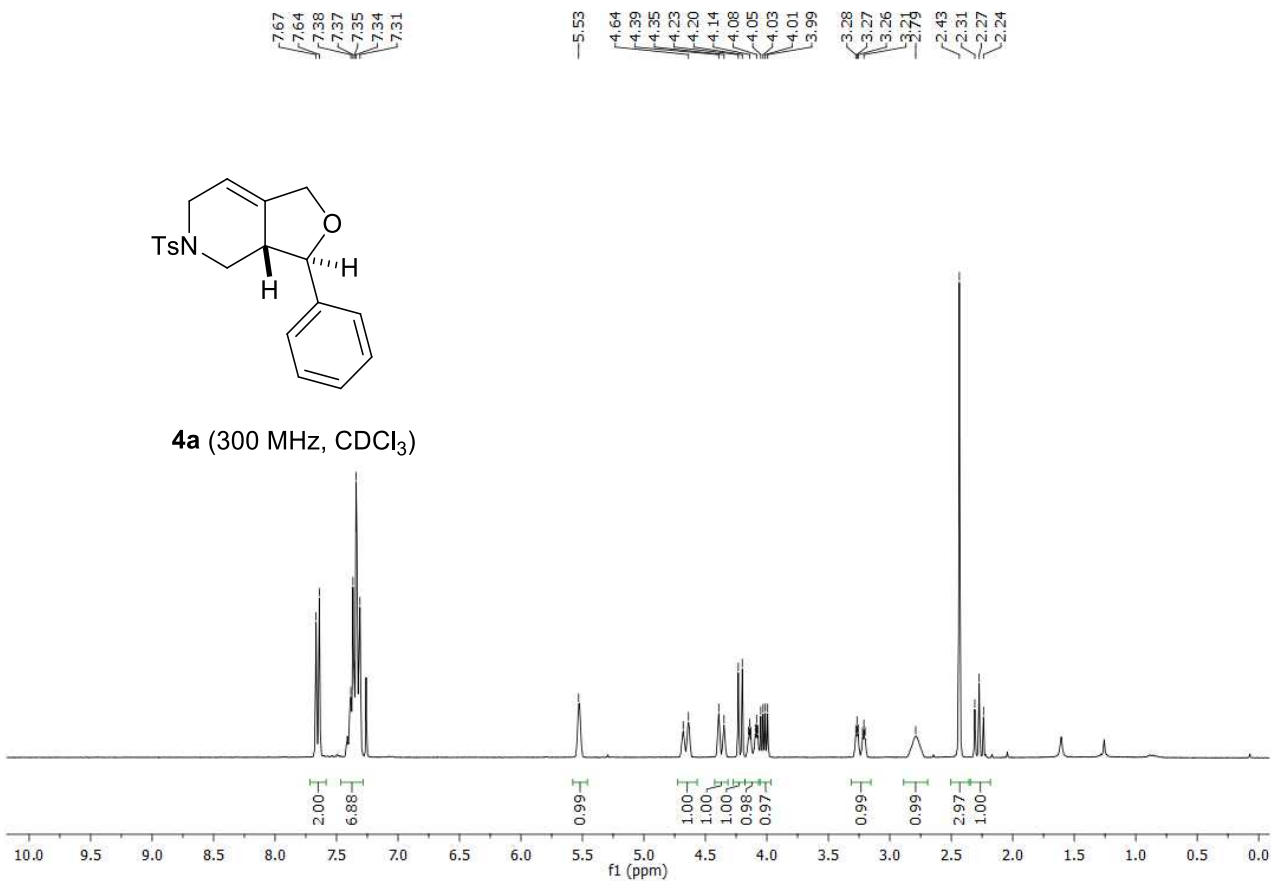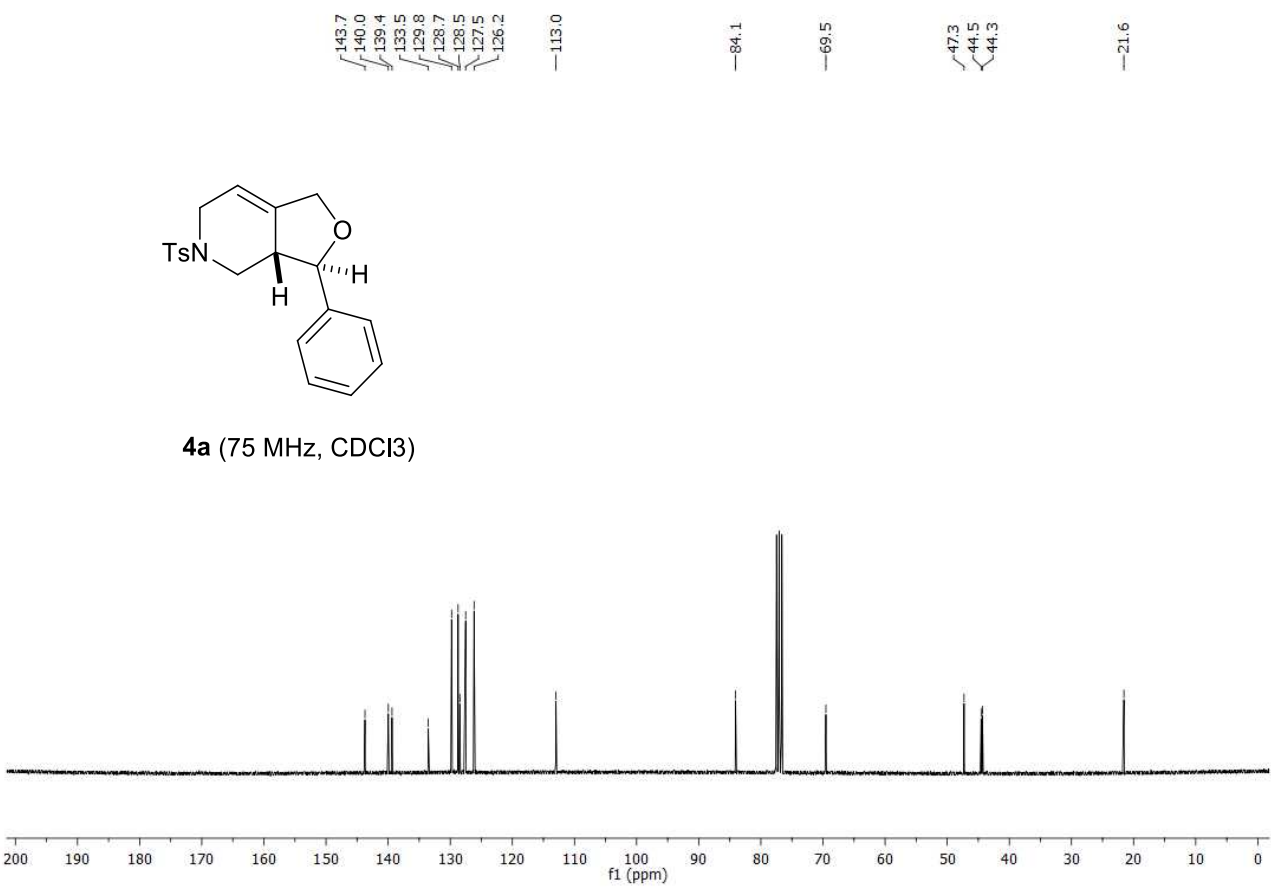



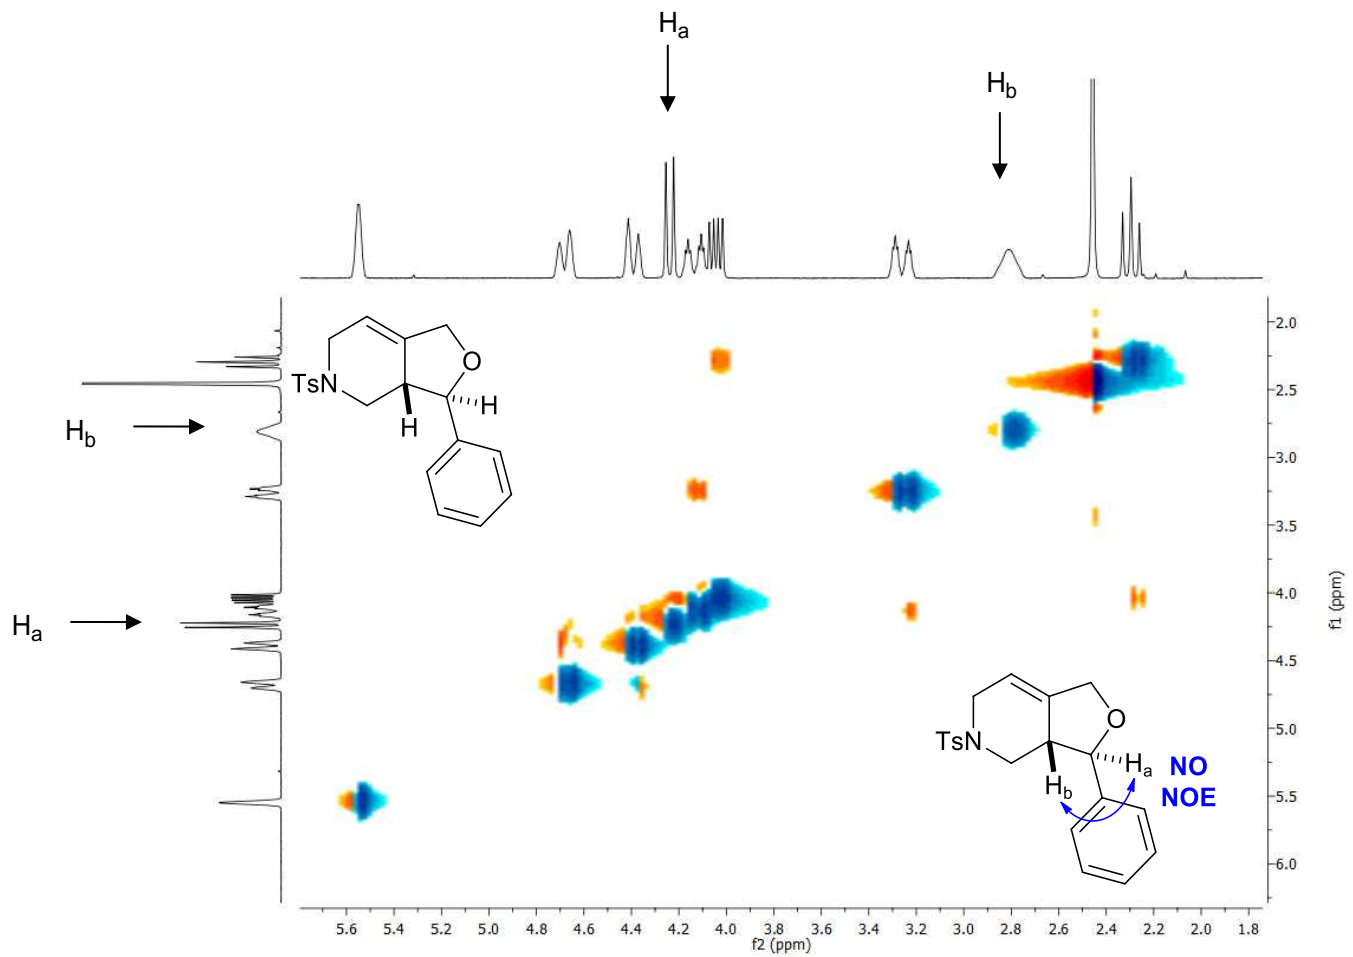

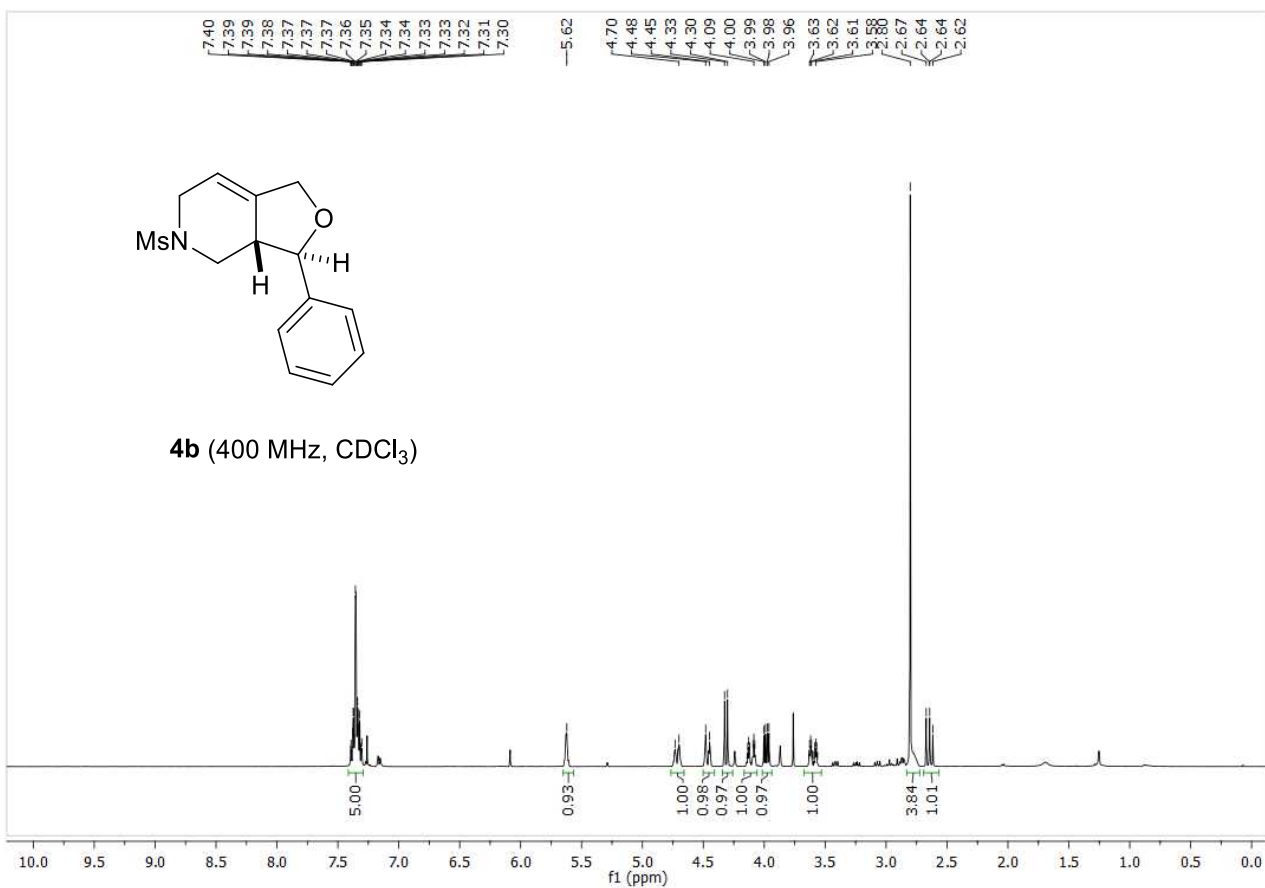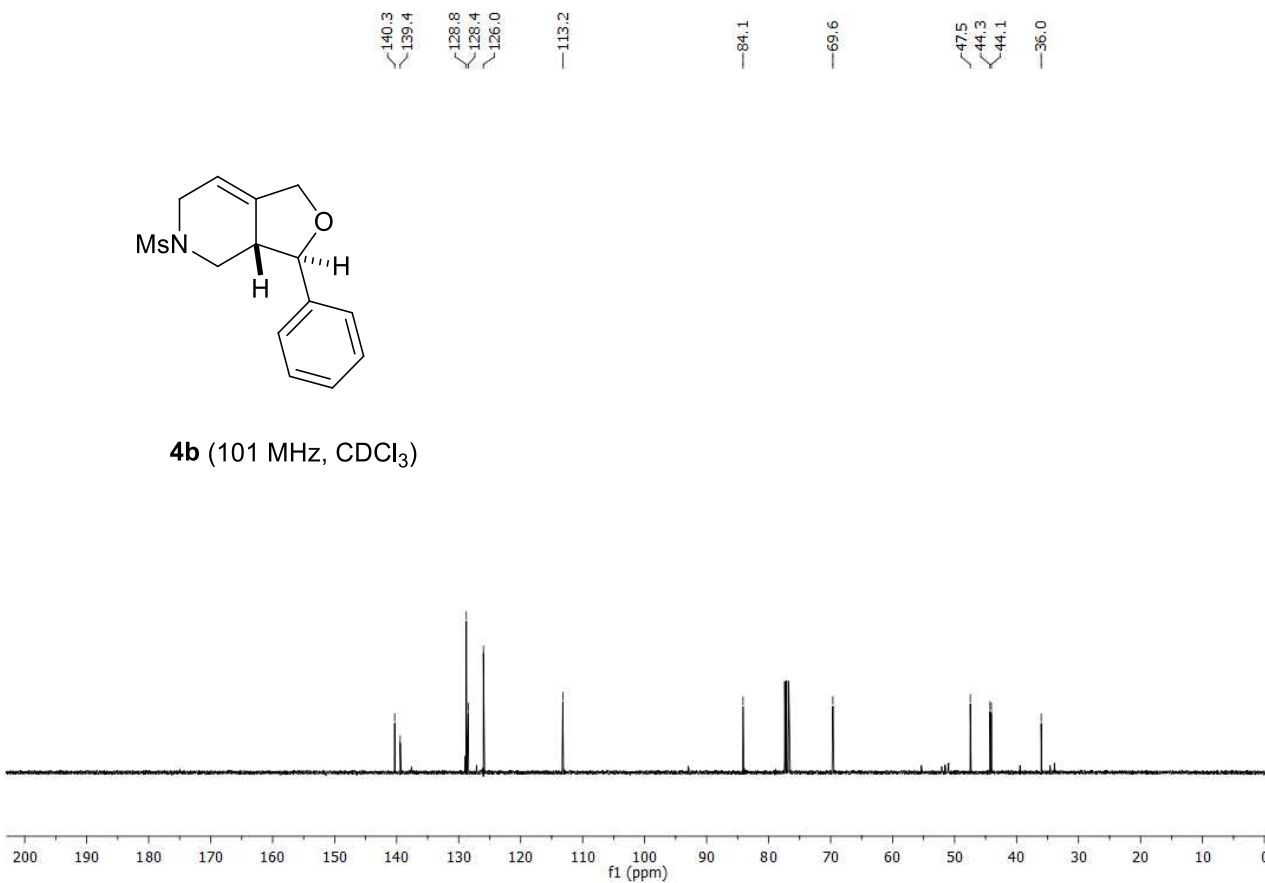

7.68  
7.66  
7.46  
7.45  
7.44  
7.35  
7.33  
7.30  
7.28  
7.28  
7.27  
7.26  
7.25  
7.24  
7.24  
7.21  
7.19  
7.18  
5.56  
5.55  
4.69  
4.66  
4.51  
4.48  
4.40  
4.37  
4.17  
4.13  
4.06  
4.05  
4.03  
4.02  
3.29  
3.25  
2.94  
2.46  
2.33  
2.31  
2.29  
2.26

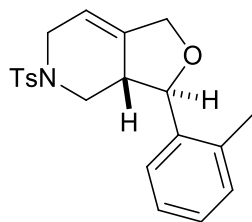

**4c** (400 MHz, CDCl<sub>3</sub>)

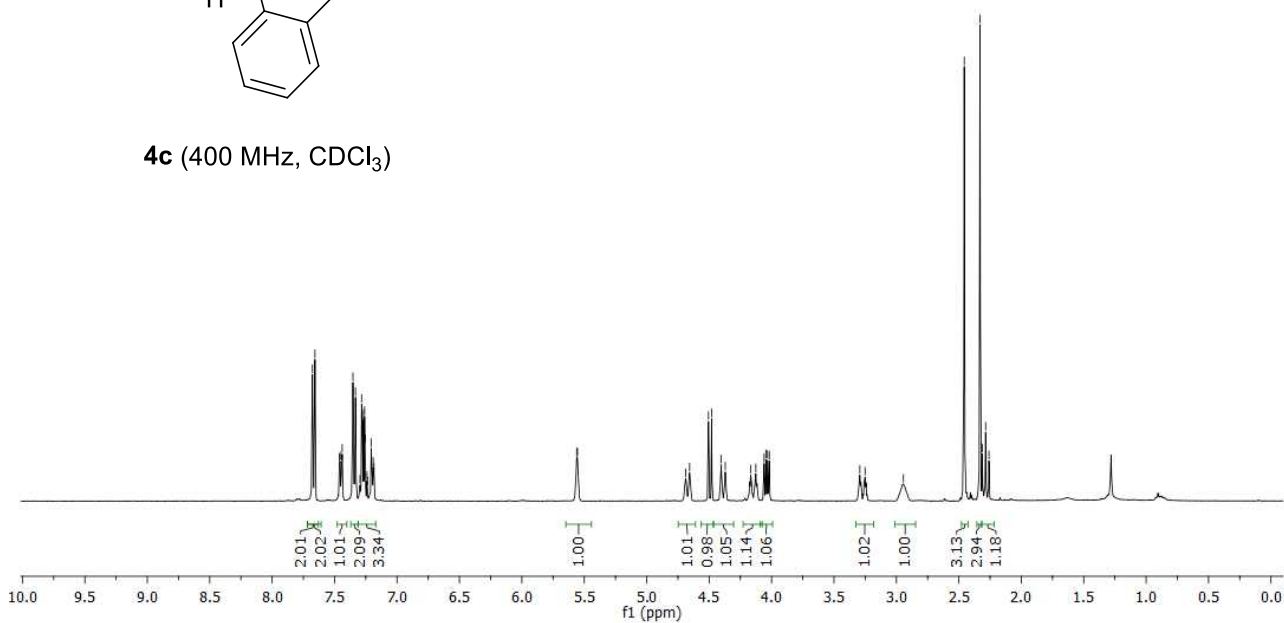

143.7  
140.2  
136.8  
135.9  
133.6  
130.7  
129.8  
128.2  
127.5  
126.5  
126.1  
112.9  
80.8  
69.3  
46.5  
44.7  
44.3  
21.5  
19.3

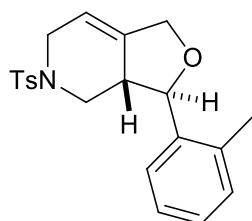

**4c** (101 MHz, CDCl<sub>3</sub>)

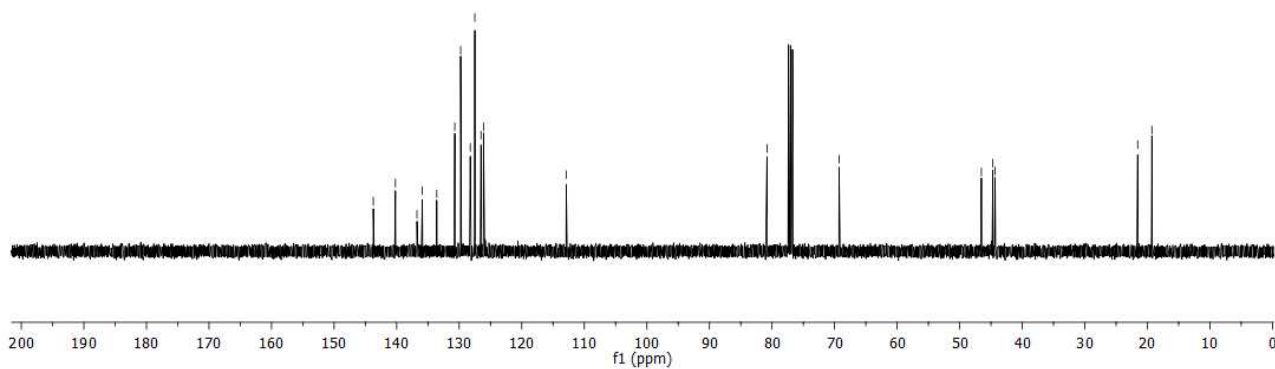

7.67  
7.65  
7.48  
7.46  
7.43  
7.41  
7.39  
7.37  
7.35  
7.34  
7.32  
7.32  
7.30  
7.28  
7.26  
6.99  
6.96  
6.96  
6.94  
6.94  
6.93  
6.91  
5.52  
5.52  
-5.09  
4.64  
4.38  
4.35  
4.20  
4.18  
4.05  
4.03  
4.02  
3.01  
3.03  
3.21  
-2.78  
2.43  
2.28  
2.26  
2.23

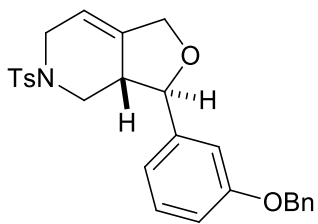

**4d** (400 MHz, CDCl<sub>3</sub>)

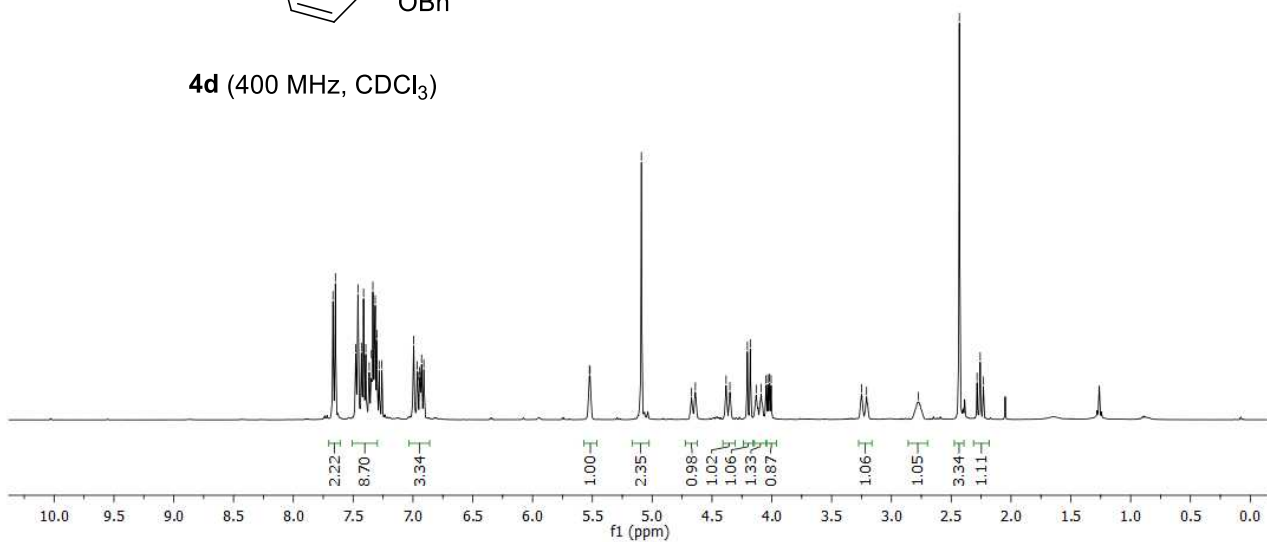

159.2  
143.8  
141.2  
139.9  
136.9  
133.5  
129.8  
129.8  
128.7  
128.1  
127.7  
127.5  
118.7  
114.5  
113.0  
112.8  
-83.9  
70.1  
69.6  
47.4  
44.6  
44.3  
-21.6

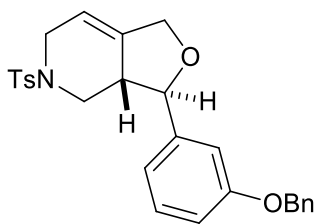

**4d** (101 MHz, CDCl<sub>3</sub>)

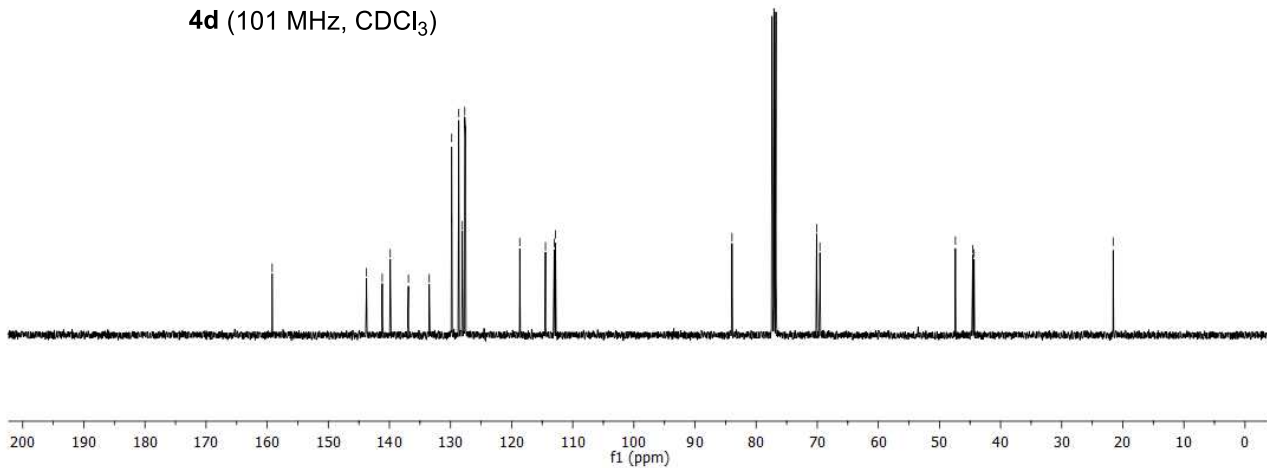

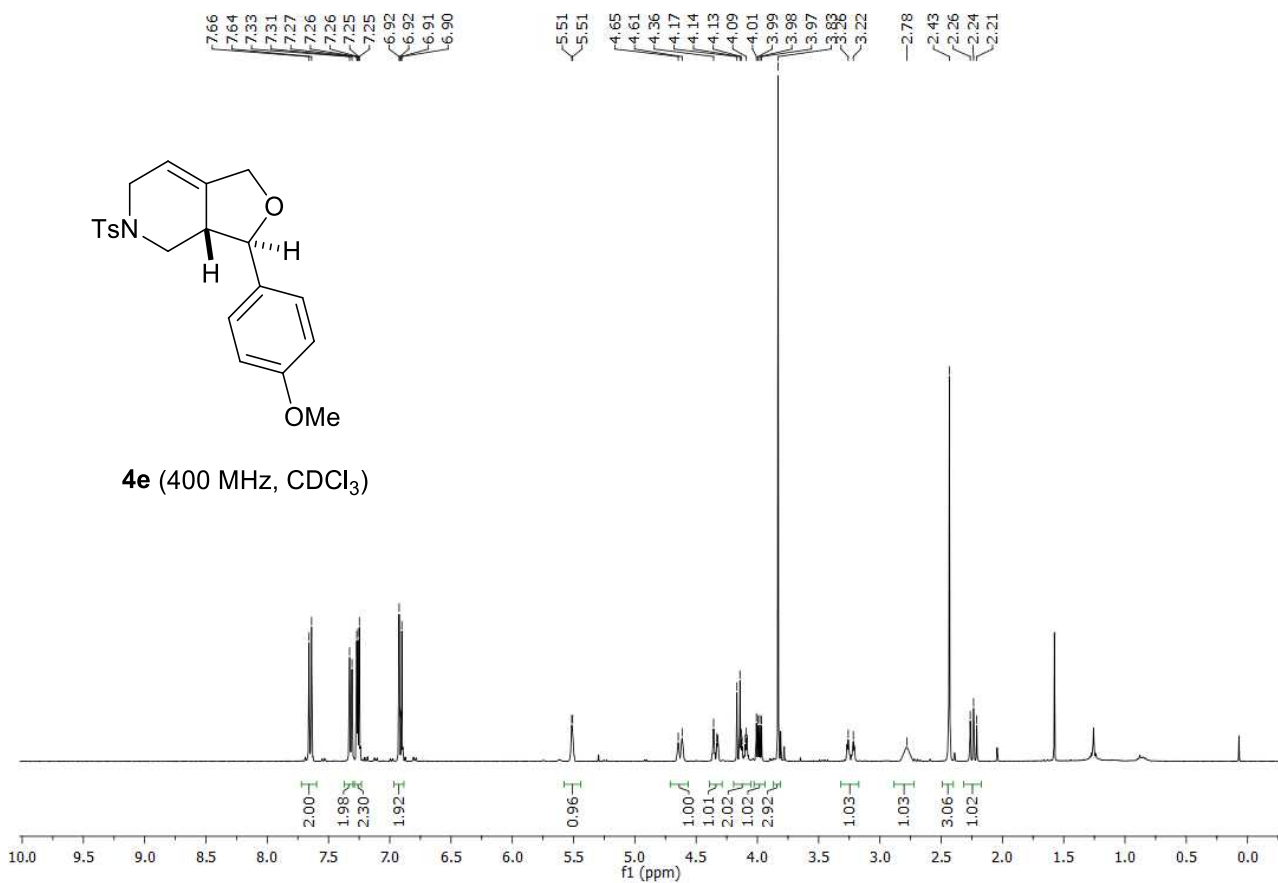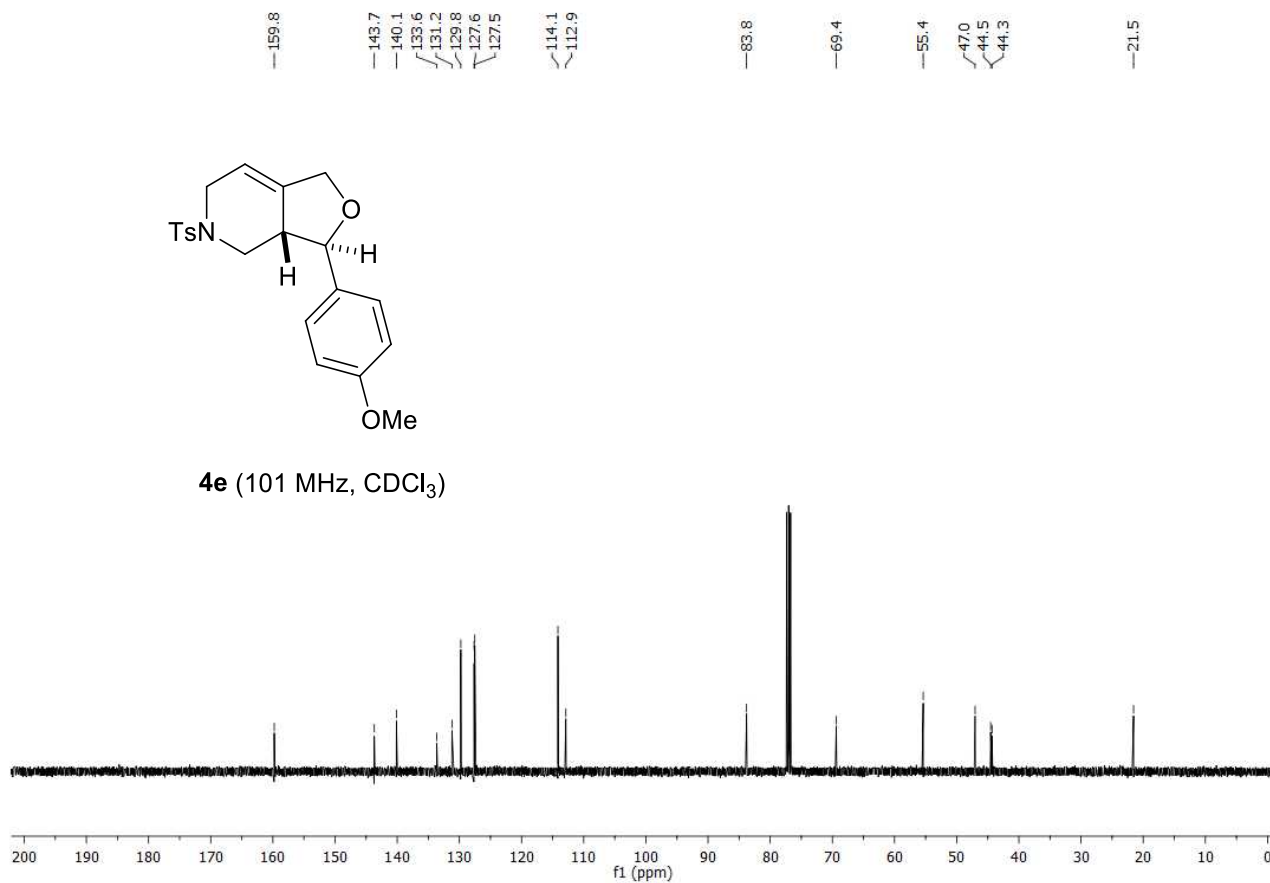

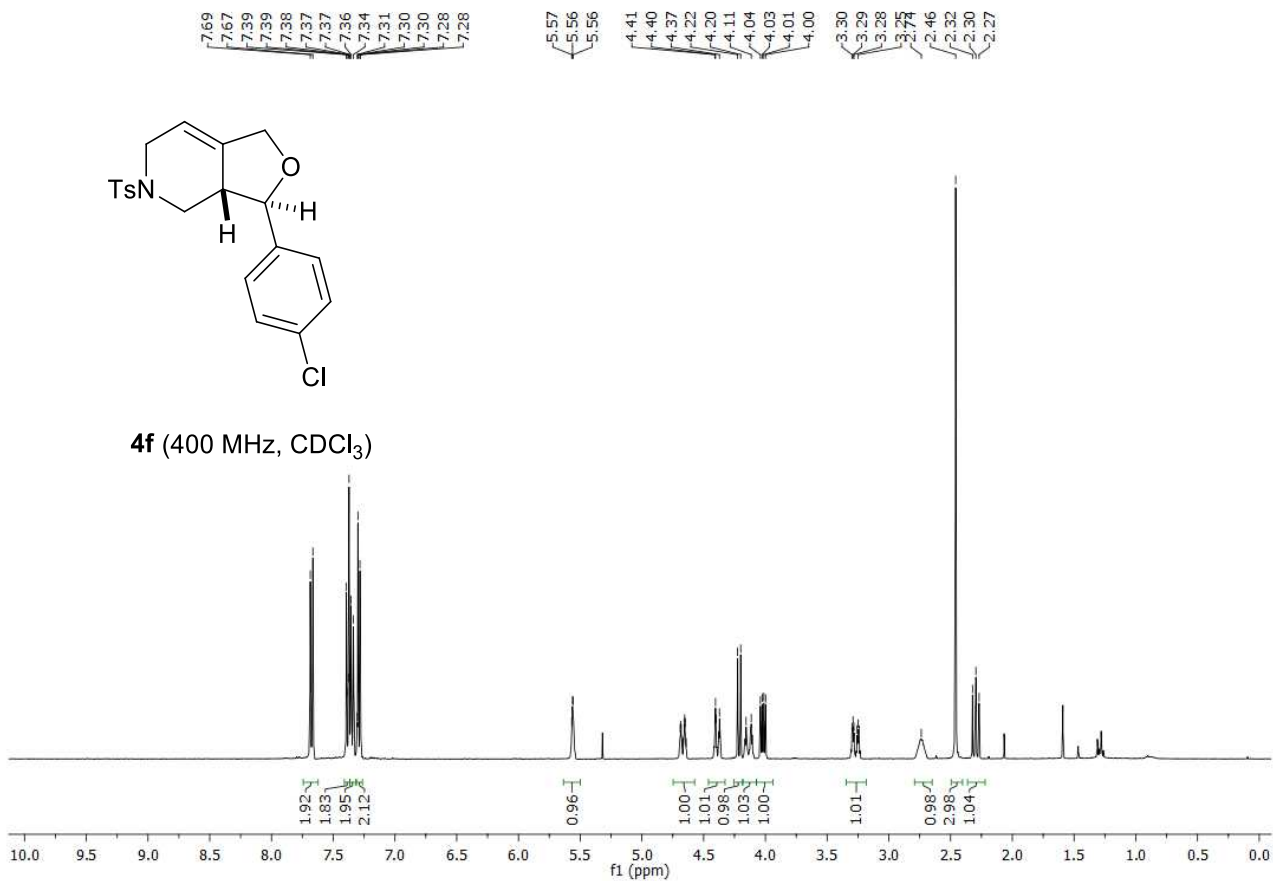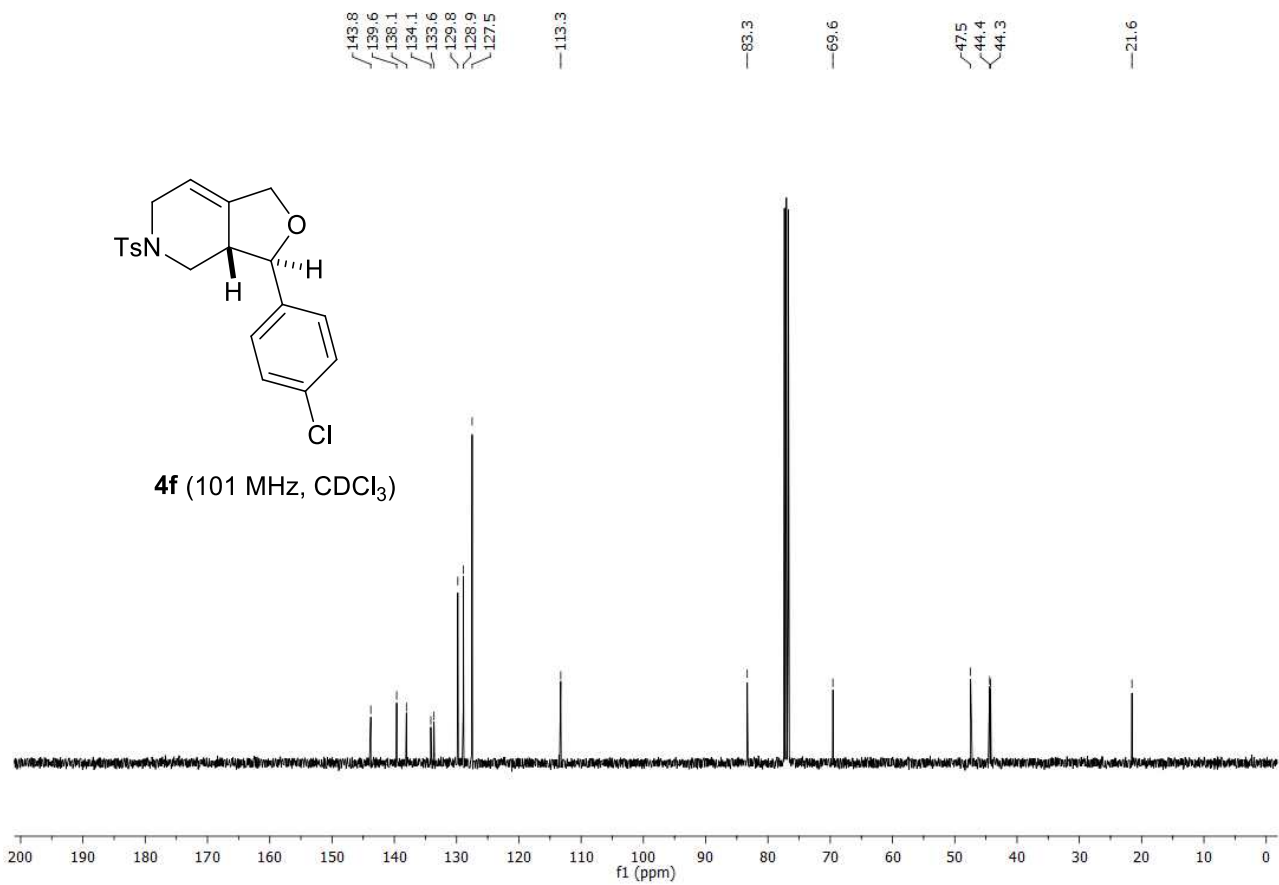

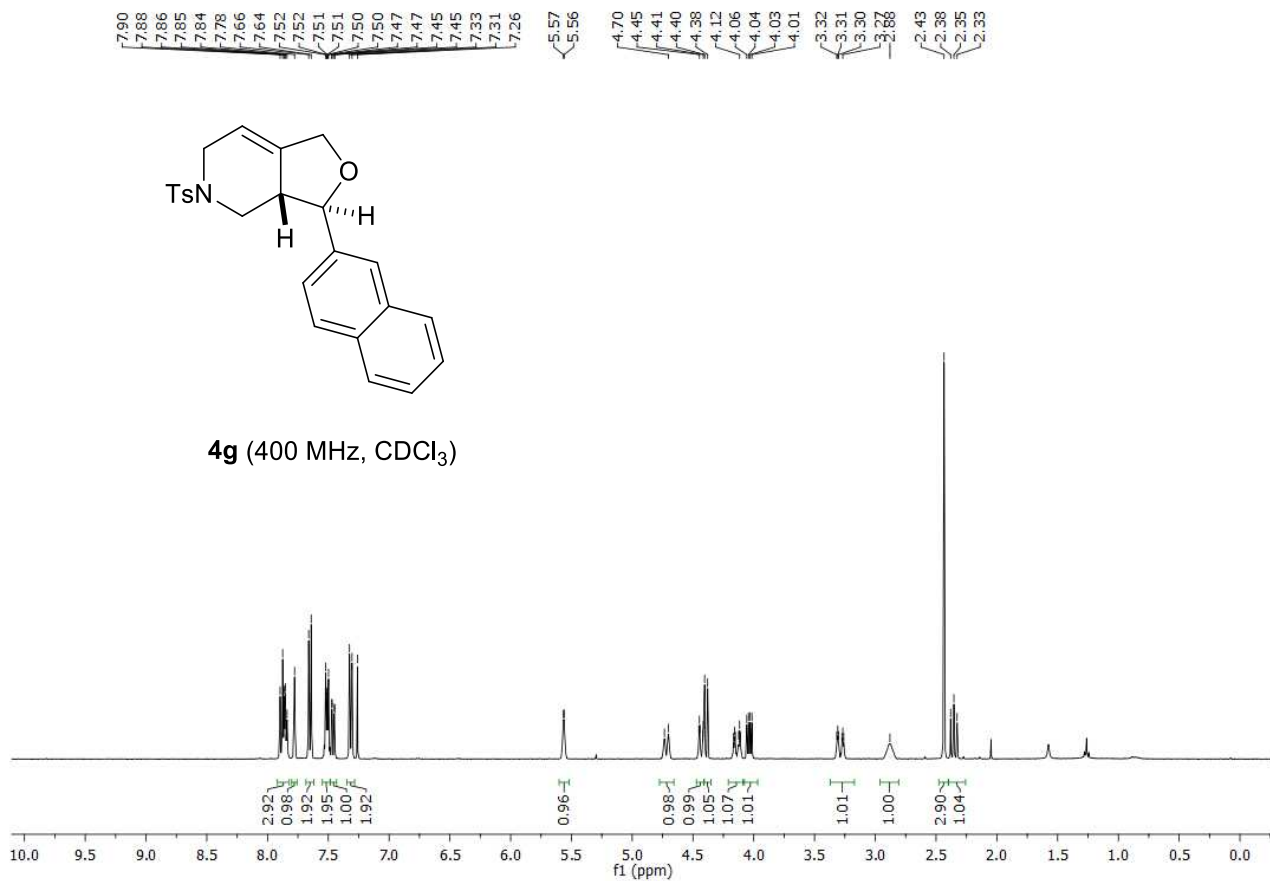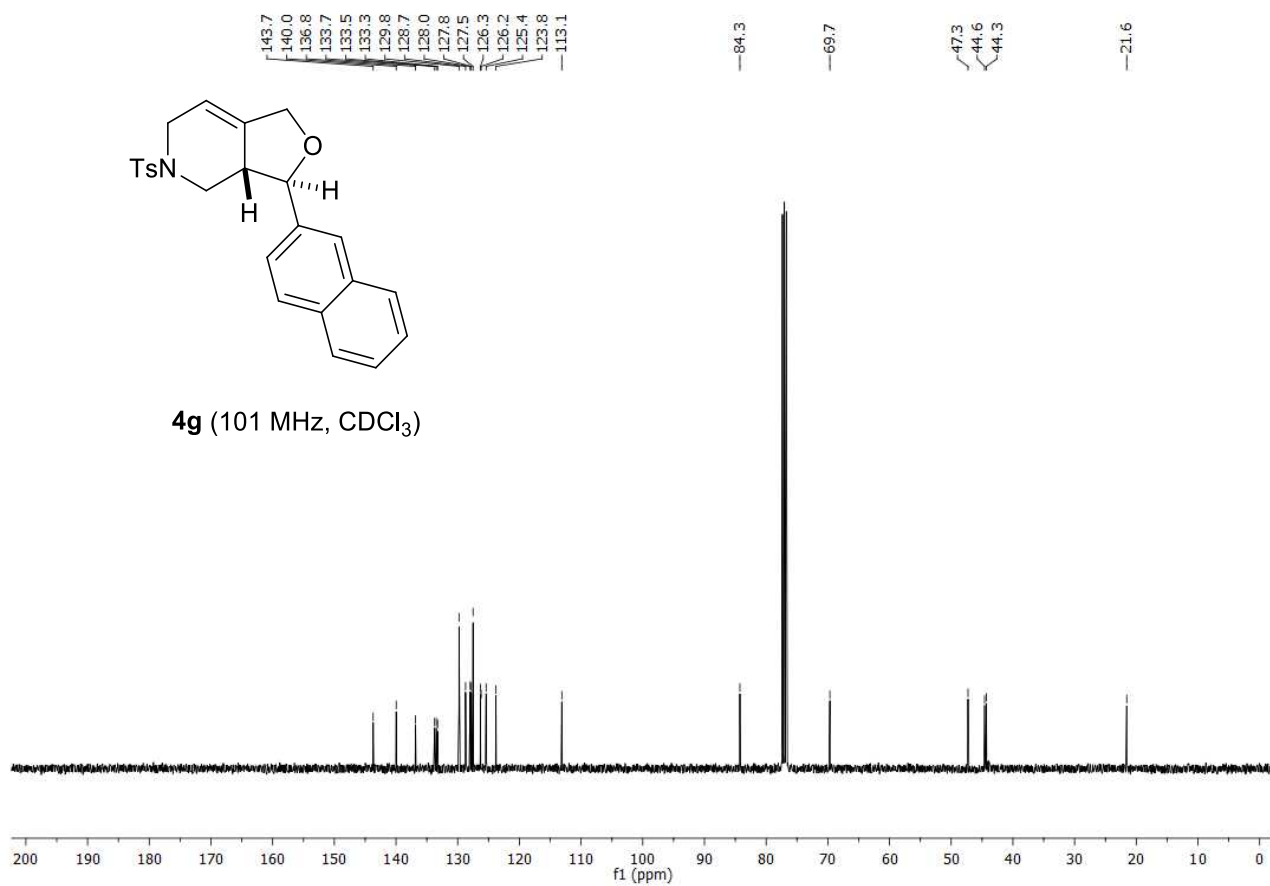

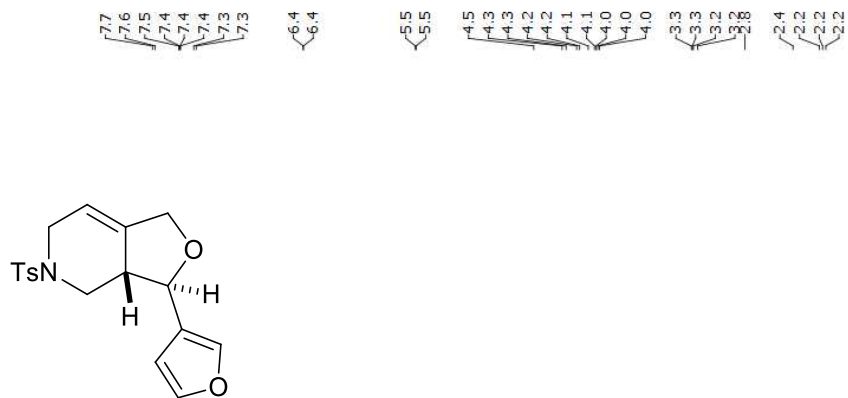

**4h** (400 MHz, CDCl<sub>3</sub>)

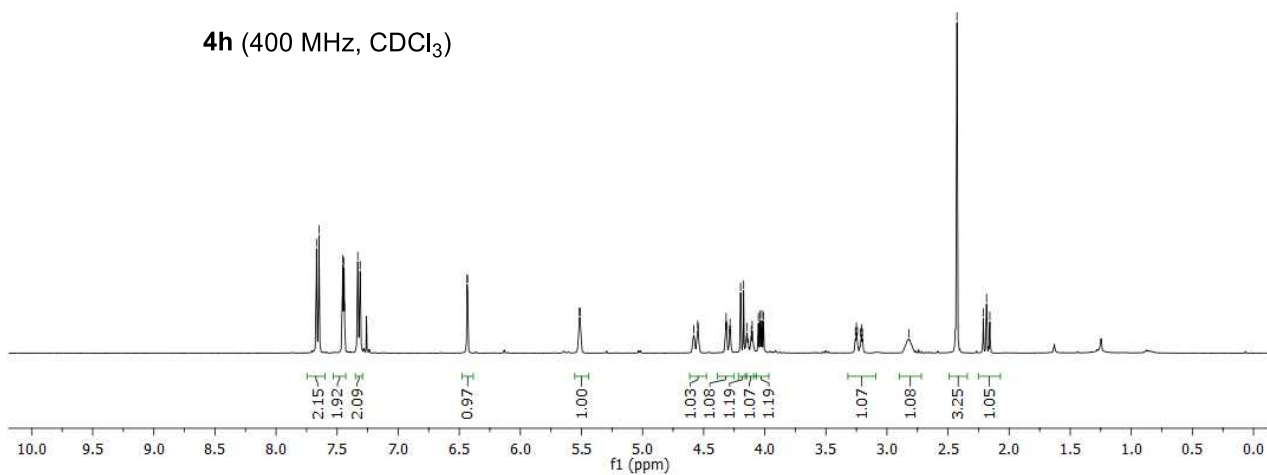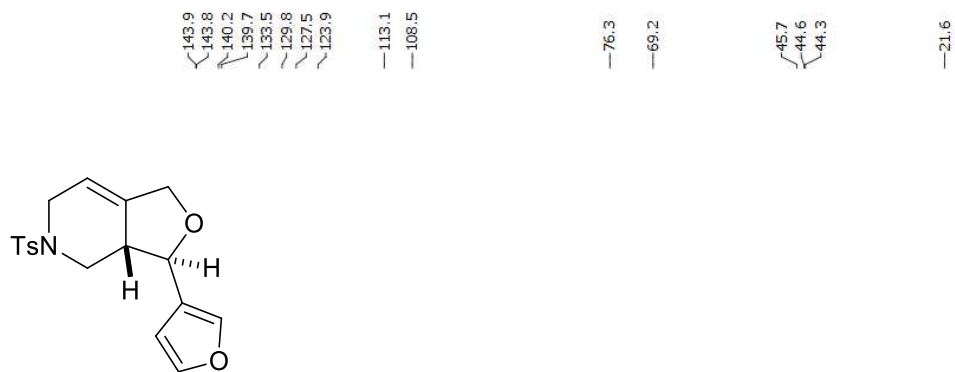

**4h** (101 MHz, CDCl<sub>3</sub>)

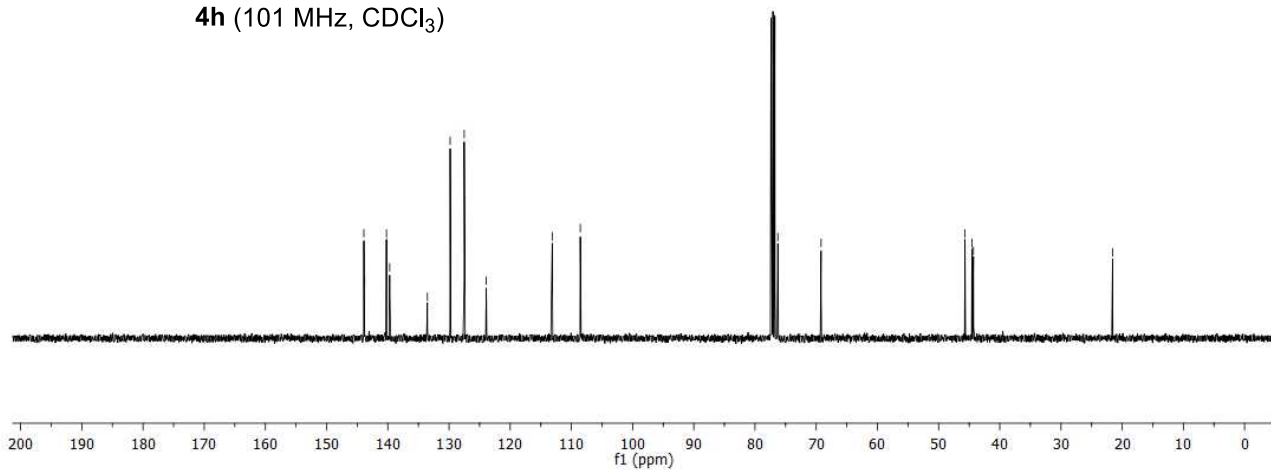



7.67  
7.65  
7.33  
7.32  
7.32  
7.31  
7.26  
7.03  
7.03  
7.02  
7.01  
7.00  
6.99

5.52  
4.63  
4.60  
4.49  
4.47  
4.35  
4.32  
4.15  
4.14  
4.11  
4.10  
4.09  
4.08  
4.07  
3.22  
2.90  
2.43  
2.27  
2.25  
2.22

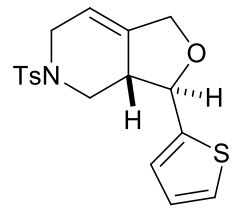

**4i** (400 MHz, CDCl<sub>3</sub>)

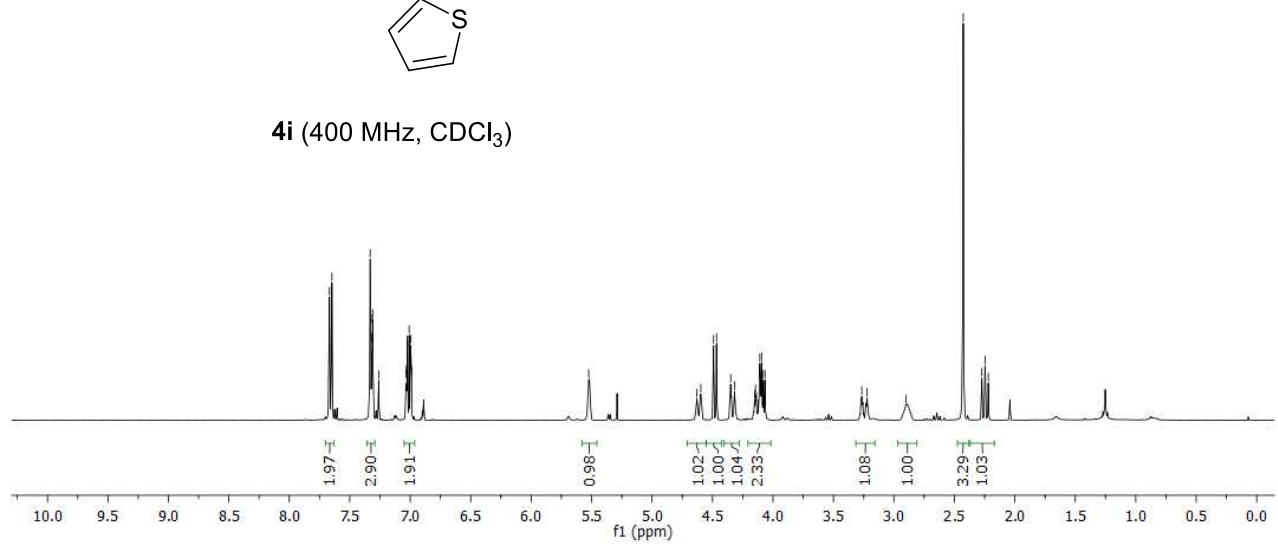

143.8  
142.4  
139.3  
129.8  
127.5  
126.8  
125.8  
125.2  
113.4  
79.5  
69.4  
47.4  
44.5  
44.3  
21.6

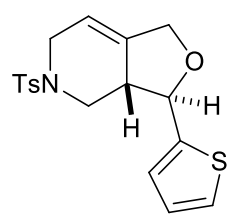

**4i** (101 MHz, CDCl<sub>3</sub>)

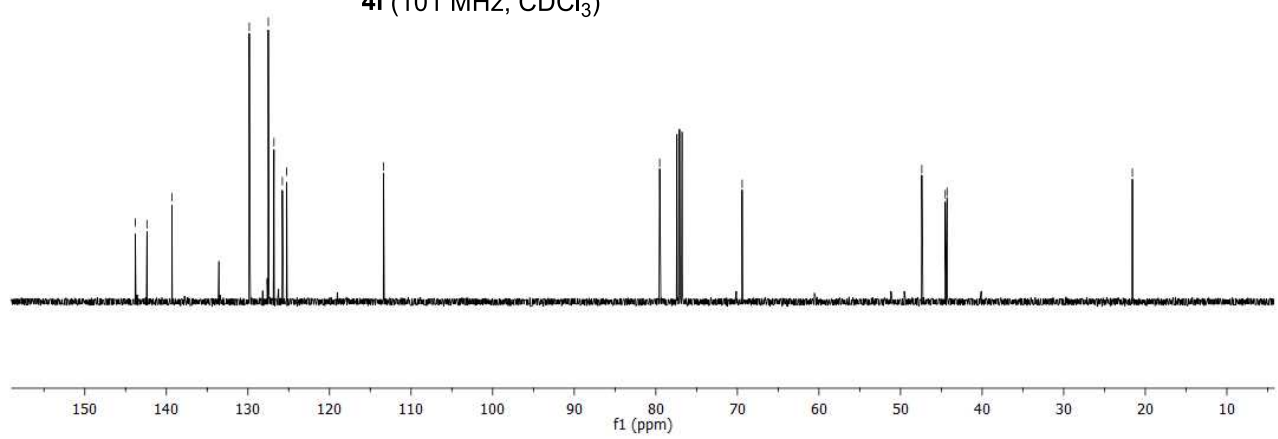

## Crystallographic data

*X-ray crystallography.* A summary of data collection and structure refinement for **4a** and **2e** is reported in Table 1. Single crystal data were collected with *Bruker D8 Venture PhotonII* area detector diffractometer. Complete datasets were obtained by merging several series of exposure frames.<sup>[7]</sup> An absorption correction was applied with the program SADABS.<sup>[8]</sup> The structure were solved with ShelxT<sup>[9]</sup> and refined on  $F^2$  with full-matrix least squares (ShelxL),<sup>[10]</sup> using the Olex2 software package.<sup>[11]</sup> Non hydrogen atoms were refined anisotropically, and the hydrogen atoms were placed at their calculated positions.

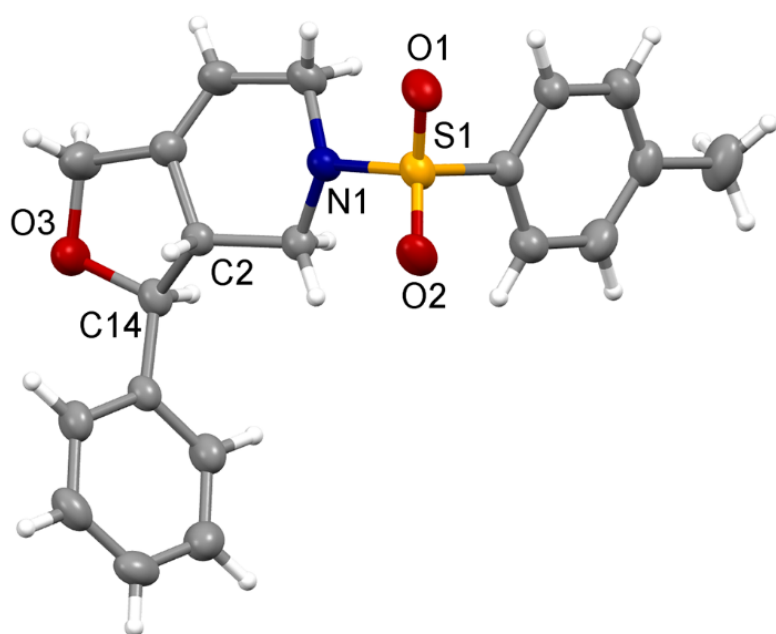

**Figure 1.** Asymmetric unit of **4a** with thermal ellipsoids depicted at the 30% probability level. C(14) and C(2) are stereocenters and in the asymmetric unit they exhibit S and R chirality, respectively. The space group is centrosymmetric ( $C2/c$ ), hence the centrosymmetrically related molecular structure is also present.

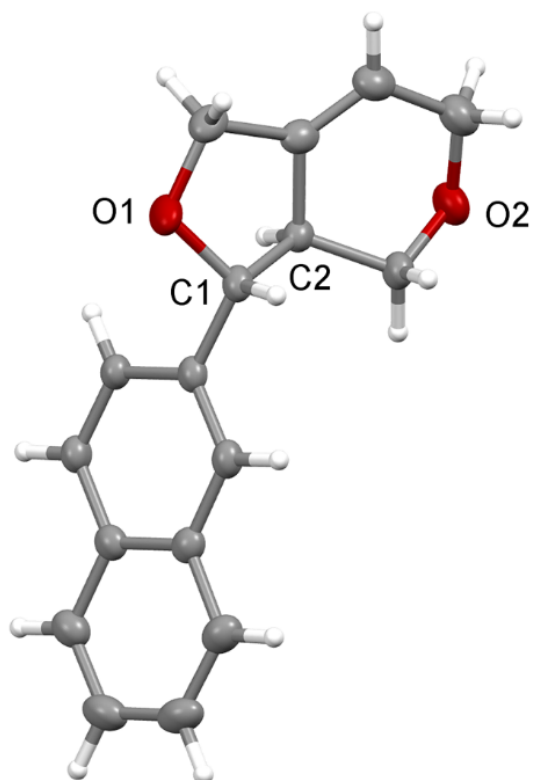

**Figure 2.** Asymmetric unit of **2e** with thermal ellipsoids depicted at the 30% probability level. C(1) and C(2) are stereocenters and in the asymmetric unit they exhibit R and S chirality, respectively. The space group is chiral  $P2_12_12_1$  and, in the crystal, the compound is enantiopure.

**Table 1.** Crystal data and structure refinement for **4a** and **2e**

|                                             | <b>4a</b>                                                     | <b>2e</b>                                                     |
|---------------------------------------------|---------------------------------------------------------------|---------------------------------------------------------------|
| Empirical formula                           | C <sub>20</sub> H <sub>21</sub> NO <sub>3</sub> S             | C <sub>17</sub> H <sub>16</sub> O <sub>2</sub>                |
| Formula weight                              | 355.44                                                        | 252.30                                                        |
| Temperature/K                               | 270                                                           | 200                                                           |
| Crystal system                              | monoclinic                                                    | orthorhombic                                                  |
| Space group                                 | C2/c                                                          | P2 <sub>1</sub> 2 <sub>1</sub> 2 <sub>1</sub>                 |
| a/Å                                         | 33.942(4)                                                     | 7.3872(2)                                                     |
| b/Å                                         | 11.5163(11)                                                   | 10.8747(3)                                                    |
| c/Å                                         | 9.4629(9)                                                     | 16.4977(4)                                                    |
| $\alpha$ /°                                 | 90                                                            | 90                                                            |
| $\beta$ /°                                  | 99.030(4)                                                     | 90                                                            |
| $\gamma$ /°                                 | 90                                                            | 90                                                            |
| Volume/Å <sup>3</sup>                       | 3653.1(6)                                                     | 1325.32(6)                                                    |
| Z                                           | 8                                                             | 4                                                             |
| $\rho_{\text{calc}}/\text{cm}^3$            | 1.293                                                         | 1.264                                                         |
| $\mu/\text{mm}^{-1}$                        | 0.195                                                         | 0.648                                                         |
| F(000)                                      | 1504.0                                                        | 536.0                                                         |
| Crystal size/mm <sup>3</sup>                | 0.22 × 0.06 × 0.06                                            | 0.27 × 0.22 × 0.08                                            |
| Radiation                                   | MoK $\alpha$ ( $\lambda$ = 0.71073)                           | CuK $\alpha$ ( $\lambda$ = 1.54184)                           |
| 2 $\Theta$ range for data collection/°      | 5.888 to 51.43                                                | 10.726 to 149.024                                             |
| Index ranges                                | -41 ≤ h ≤ 38, -14 ≤ k ≤ 14, -11 ≤ l ≤ 11                      | -9 ≤ h ≤ 9, -13 ≤ k ≤ 13, -20 ≤ l ≤ 20                        |
| Reflections collected                       | 19589                                                         | 40279                                                         |
| Independent reflections                     | 3460 [R <sub>int</sub> = 0.0991, R <sub>sigma</sub> = 0.0607] | 2682 [R <sub>int</sub> = 0.0208, R <sub>sigma</sub> = 0.0084] |
| Data/restraints/parameters                  | 3460/0/228                                                    | 2682/0/172                                                    |
| Goodness-of-fit on F <sup>2</sup>           | 1.031                                                         | 1.059                                                         |
| Final R indexes [I ≥ 2 $\sigma$ (I)]        | R <sub>1</sub> = 0.0516, wR <sub>2</sub> = 0.1011             | R <sub>1</sub> = 0.0306, wR <sub>2</sub> = 0.0833             |
| Final R indexes [all data]                  | R <sub>1</sub> = 0.1147, wR <sub>2</sub> = 0.1309             | R <sub>1</sub> = 0.0307, wR <sub>2</sub> = 0.0835             |
| Largest diff. peak/hole / e Å <sup>-3</sup> | 0.19/-0.23                                                    | 0.29/-0.16                                                    |
| Flack parameter                             | -                                                             | 0.04(2)                                                       |

## References

- [1] C. Cecchini, M. Lanzi, G. Cera, M. Malacria and G. Maestri, *Synthesis*, 2019, **51**, 1216.
- [2] M. Lanzi, T. Cañeque, L. Marchiò, R. Maggi, F. Bigi, M. Malacria and G. Maestri, *ACS Catal.*, 2018, **8**, 144.
- [3] C.A. Busacca, and Y. Dong, *Tetrahedron Lett.*, 1996, **37**, 3947.
- [4] J. Cordón, J.M. López-de-Luzuriaga, and M. Monge, *Organometallics*, 2016, **35**, 732.
- [5] Y. Lu, X. Fu, H. Chen, X Du, X. Jia and Y. Liu, *Adv. Synth. Catal.*, 2009, **351**, 129.
- [6] S. López, E. Herrero-Gómez, P. Pérez-Galán, C. Nieto-Oberhuber and A. Echavarren, *Angew. Chem.Int.Ed.*, 2006, **45**, 6029.
- [7] Bruker, 2012. SMART and SAINT. Bruker AXS Inc., Madison, Wisconsin, USA.
- [8] L. Krause, R. Herbst-Irmer, G. M. Sheldrick and D. J. Stalke, *Appl. Cryst.*, 2015, **48**, 3.
- [9] G. M. Sheldrick, *Acta Crystallographica Section A*, 2015, **71**, 3.
- [10] G. M. Sheldrick, *Acta Crystallographica Section C*, 2015, **71**, 3.
- [11] O.V. Dolomanov, L.J. Bourhis, R.J. Gildea, J.A.K. Howard and H. Puschmann, *J. Appl. Cryst.*, 2009, **42**, 339.
